# Supplementary material for: Iron(iii)-catalyzed mono-, di- and tricyanomethylation of primary amines with diazoacetonitrile: construction of α-amino acetonitriles and asymmetric α-amino succinonitriles
Source: Royal Society of Chemistry journal article supplement (doi:10.1039/d4qo02218a), 2025-01-01

## Supporting Information

# **Iron(III)-catalyzed mono-, di- and tricyanomethylation of primary amines with diazoacetonitrile: Construction of $\alpha$ -amino acetonitriles and asymmetric $\alpha$ -amino succinonitriles**

Gang Wang, Yu-Heng Zeng<sup>‡</sup>, Qian-Yu Jiang<sup>‡</sup>, Jia-Yi Chen,

Rong Zhou and Huai-Bo Zou<sup>\*</sup>

Department of Chemistry & Bioengineering, Yichun Key Laboratory of Applied Chemistry, Key Laboratory of Jiangxi University for Applied Chemistry & Chemical Biology, Yichun University, Yichun 336000, China

E-mail: zouhb@jxycu.edu.cn

## **Contents**

| <b>List of Contents</b>                                                                                         | <b>Page No.</b> |
|-----------------------------------------------------------------------------------------------------------------|-----------------|
| I. General Information.....                                                                                     | 2               |
| II. General Procedures.....                                                                                     | 2               |
| III. Characterization Data of the Diazoacetonitrile ( <b>1a</b> ).....                                          | 4               |
| IV. Characterization Data of the Products <b>2a–2v</b> , <b>3a–3s</b> , <b>5a–5s</b> and <b>3a'</b> .....       | 4               |
| V. The Gram-Scale Synthesis of <b>2a</b> , <b>3a</b> and <b>5a</b> .....                                        | 26              |
| VI. Procedure for Synthetic Transformation of <b>3a</b> and Characterization Data of the Product <b>6</b> ..... | 27              |
| VII. The Control Experiments.....                                                                               | 28              |
| VIII. Solvent Effect on the Mono- and Dicyanomethylation Reaction.....                                          | 29              |
| IX. References.....                                                                                             | 31              |
| X. NMR Spectra.....                                                                                             | 32              |

## I. General Information

All reactions were carried out under an inert atmosphere ( $N_2$ ) unless otherwise stated, with oven-dried glassware using standard techniques. All reagents with the exception of diazoacetonitrile (**1a**) and 2,2'-(phenylazanediyldiacetonitrile (**3a'**) were purchased from reagent suppliers. Unless otherwise noted, all solvents and chemicals were reagent grade. Column chromatography was performed by using 200–300 mesh silica gel. Yields are based on the pure products isolated. The diazoacetonitrile was prepared according to the reported method. All  $^1H$ ,  $^{13}C$ , and  $^{19}F$  NMR spectra were recorded on a Bruker Avance III 400 MHz NMR spectrometer with tetramethylsilane (TMS) as internal reference in  $\delta$  scale downfield from TMS. Coupling constants ( $J$ ) were reported in hertz (Hz). The following abbreviations are used: s = singlet; d = doublet; and m = multiplet. High-resolution mass spectrometry (HR-MS) electrospray ionization (ESI) mass spectra were recorded on an Agilent 1290/6545 UPLC-TOF/MS spectrometer. GC-MS and HPLC-MS analyses were conducted on an Agilent 8890-7000 and an Agilent 1290/6545 UPLC-TOF/MS apparatus, respectively.

## II. General Procedures

### Procedure for the Synthesis of Diazoacetonitrile **1a**<sup>S1</sup>

Aminoacetonitrile hydrochloride (4.63 g, 50 mmol) was dissolved in water (10 mL) in a 100 mL round-bottomed flask immersed in an ice-water bath, and then  $CH_2Cl_2$  (20 mL) was added. The mixture was stirred vigorously, and  $NaNO_2$  (3.45 g, 50 mmol) was added over 10 min. After stirring for another 1 h, the mixture was extracted with  $CH_2Cl_2$  (50 mL), and the organic layer was washed with brine and dried over  $Na_2SO_4$ . Removing the solvent at 0 °C under vacuum and giving the  $N_2CHCN$  as a yellow liquid (1.98 g, 59%), and then it is formulated into a 1 mmol/mL acetonitrile solution to storage and use.

### General Procedure of the **2a–2s**

A 0.5 mmol amount of amines and 3.52 mg (1 mol% ) of (TPP)Fe(III)Cl were placed into a reaction flask and dissolved in 4 mL of DCM at 25 °C under  $N_2$ . A solution of 52.25 mg (0.75 mmol) of diazoacetonitrile in 1 mL of DCM was added by syringe in one aliquot to the reaction mixture with vigorous stirring. After 20 min, the solvent was removed *in vacuo*. The residue was

separated through column chromatography using EtOAc/petroleum ether as eluting, and then the desired target product was obtained upon evaporation of the solvent.

#### **General Procedure of the 3a–3p**

A 0.5 mmol amount of aniline and 3.52 mg (1 mol% ) of (TPP)Fe(III)Cl were placed into a reaction flask and dissolved in 2 mL of acetonitrile at 25 °C under N<sub>2</sub>. A solution of 134 mg (2 mmol) of diazoacetonitrile in 0.5 mL of DCM was added by syringe in one aliquot to the reaction mixture with vigorous stirring. After 20 min, the solvent was removed *in vacuo*. The residue was separated through column chromatography using EtOAc/petroleum ether as eluting, and then the desired target product was obtained upon evaporation of the solvent.

#### **General Procedure of the 5a–5r**

A 0.5 mmol amount of amines and 3.52 mg (1 mol% ) of (TPP)Fe(III)Cl were placed into a reaction flask and dissolved in 4 mL of DCM at 25 °C under N<sub>2</sub>. A solution of 52.25 mg (0.75 mmol) of diazoacetonitrile in 1 mL of DCM was added by syringe in one aliquot to the reaction mixture until completion of the reaction (follow by TLC). Then 9 mg (3 mol% ) of PcFe(III)Cl was added into the reaction flask, Another solution of 167.5 mg (2.5 mmol) of diazoacetonitrile in 1 mL of DCM was added by syringe in one aliquot to the reaction mixture with vigorous stirring. After 20 min, the solvent was removed *in vacuo*. The residue was separated through column chromatography using EtOAc/petroleum ether as eluting, and then the desired target product was obtained upon evaporation of the solvent.

#### **Procedure for the Synthesis of 2,2'-(Phenylazanediyl)diacetonitrile (3a')**

A 0.5 mmol amount of aniline and 3.52 mg (1 mol% ) of (TPP)Fe(III)Cl were placed into a reaction flask and dissolved in 4 mL of DCM at 25 °C under N<sub>2</sub>. A solution of 134 mg (2 mmol) of diazoacetonitrile in 1 mL of DCM was added by syringe in one aliquot to the reaction mixture with vigorous stirring. After 20 min, the solvent was removed *in vacuo*. The residue was separated through column chromatography using EtOAc/petroleum ether as eluting, and then the desired target product was obtained upon evaporation of the solvent.

### III. Characterization Data of the Diazoacetoneitrile (1a)

Diazoacetoneitrile ( $\text{N}_2\text{CHCN}$ ): a yellow liquid, 1.98 g, yield: 59%.  $^1\text{H}$  NMR (400 MHz,  $\text{CD}_3\text{CN}$ ):  $\delta$  4.76 (s), The  $^1\text{H}$  NMR spectral data are in good agreement with the literature data.<sup>S1</sup>

### IV. Characterization Data of the Products 2a–2s, 3a–3p, 5a–5r and 3a'

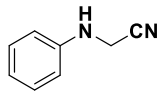

(phenylamino)acetonitrile (**2a**): a yellow liquid was obtained after column chromatography ( $\text{SiO}_2$ , 1.5 cm  $\times$  25 cm) using Petroleum ether/EtOAc (5/1, v/v), 63mg, Yield: 95%.

$^1\text{H}$  NMR (400 MHz,  $\text{CDCl}_3$ ):  $\delta$  7.27-7.22 (m, 2 H), 6.88-6.85 (m, 1 H), 6.68-6.66 (m, 2 H), 3.99 (s, 3 H).

$^{13}\text{C}$  NMR (100 MHz,  $\text{CDCl}_3$ ):  $\delta$  145.19, 119.98, 117.30, 113.65, 32.61.

These spectroscopic data are in good agreement with the literature data.<sup>S2</sup>

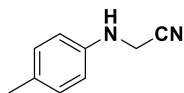

2-(p-tolylamino)acetonitrile (**2b**): a yellow liquid was obtained after column chromatography ( $\text{SiO}_2$ , 1.5 cm  $\times$  25 cm) using Petroleum ether/EtOAc (5/1, v/v), 60 mg, Yield: 82%.

$^1\text{H}$  NMR (400 MHz,  $\text{CDCl}_3$ ):  $\delta$  7.07-7.05 (m, 2 H), 6.63-6.59 (m, 2 H), 4.02-3.87 (m, 3 H), 2.27 (s, 3 H).

$^{13}\text{C}$  NMR (100 MHz,  $\text{CDCl}_3$ ):  $\delta$  142.78, 130.10, 129.46, 117.27, 117.27, 113.89, 33.04, 20.49.

These spectroscopic data are in good agreement with the literature data.<sup>S2</sup>

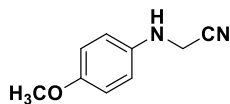

2-((4-methoxyphenyl)amino)acetonitrile (**2c**): a yellow liquid was obtained after column chromatography ( $\text{SiO}_2$ , 1.5 cm  $\times$  25 cm) using Petroleum ether/EtOAc (5/1, v/v), 67 mg, Yield: 83%.

$^1\text{H}$  NMR (400 MHz,  $\text{CDCl}_3$ ):  $\delta$  6.86-6.82 (m, 2 H), 6.69-6.65 (m, 2 H), 4.01 (s, 2 H), 3.83-3.76 (m, 4 H).



$^{13}\text{C}$  NMR (100 MHz,  $\text{CDCl}_3$ ):  $\delta$  153.89, 139.00, 117.38, 115.44, 115.08, 55.71, 33.75.

These spectroscopic data are in good agreement with the literature data.<sup>S2</sup>

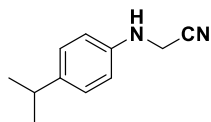

2-((4-isopropylphenyl)amino)acetonitrile (**2d**): a yellow liquid was obtained after column chromatography ( $\text{SiO}_2$ , 1.5 cm  $\times$  25 cm) using Petroleum ether/EtOAc (5/1, v/v), 76.5 mg, Yield: 88%.

$^1\text{H}$  NMR (400 MHz,  $\text{CDCl}_3$ ):  $\delta$  7.13-7.10 (m, 2 H), 6.66-6.62 (m, 2 H), 4.01-3.91 (m, 3 H), 2.87-2.80 (m, 1 H), 1.22-1.20 (m, 6 H).

$^{13}\text{C}$  NMR (100 MHz,  $\text{CDCl}_3$ ):  $\delta$  143.08, 140.64, 127.49, 117.38, 113.80, 33.28, 32.96, 24.20.

These spectroscopic data are in good agreement with the literature data.<sup>S3</sup>

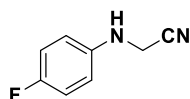

2-((4-fluorophenyl)amino)acetonitrile (**2e**): a light yellow liquid was obtained after column chromatography ( $\text{SiO}_2$ , 1.5 cm  $\times$  25 cm) using Petroleum ether/EtOAc (20/1, v/v), 57 mg, Yield: 76%;

$^1\text{H}$  NMR (400 MHz,  $\text{CDCl}_3$ ):  $\delta$  6.99-6.93 (m, 2 H), 6.66-6.61 (m, 2 H), 4.03 (s, 3 H).

$^{13}\text{C}$  NMR (100 MHz,  $\text{CDCl}_3$ ):  $\delta$  158.38, 156.02, 141.40, 141.37, 117.13, 116.27, 116.04, 114.95, 114.87, 33.28.

$^{19}\text{F}$  NMR (376 MHz,  $\text{CDCl}_3$ ):  $\delta$  -124.67-(-124.71) (m).

These spectroscopic data are in good agreement with the literature data.<sup>S2</sup>

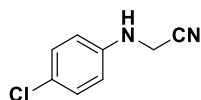

2-((chlorophenyl)amino)acetonitrile (**2f**): a light yellow liquid was obtained after column chromatography ( $\text{SiO}_2$ , 1.5 cm  $\times$  25 cm) using Petroleum ether/EtOAc (5/1, v/v), 76 mg, Yield: 92%.

$^1\text{H}$  NMR (400 MHz,  $\text{CDCl}_3$ ):  $\delta$  7.21-7.17 (m, 2 H), 6.62-6.58 (m, 2 H), 4.12-4.00 (m, 3 H).

$^{13}\text{C}$  NMR (100 MHz,  $\text{CDCl}_3$ ):  $\delta$  143.75, 129.48, 124.74, 116.96, 114.81, 32.67.

These spectroscopic data are in good agreement with the literature data.<sup>S2</sup>

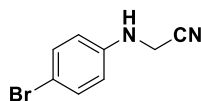

2-((4-bromophenyl)amino)acetonitrile (**2g**): a light yellow liquid was obtained after column chromatography ( $\text{SiO}_2$ , 1.5 cm  $\times$  25 cm) using Petroleum ether/EtOAc (20/1, v/v), 98mg, Yield: 94%.

$^1\text{H}$  NMR (400 MHz,  $\text{CDCl}_3$ ):  $\delta$  7.36-7.32 (m, 2 H), 6.58-6.54 (m, 2 H), 4.11-4.03 (m, 3 H).

$^{13}\text{C}$  NMR (100 MHz,  $\text{CDCl}_3$ ):  $\delta$  144.14, 132.37, 116.80, 115.25, 111.97, 32.59.

These spectroscopic data are in good agreement with the literature data.<sup>S2</sup>

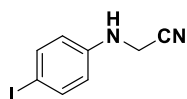

2-((4-iodophenyl)amino)acetonitrile (**2h**): a light yellow liquid was obtained after column chromatography ( $\text{SiO}_2$ , 1.5 cm  $\times$  25 cm) using Petroleum ether/EtOAc (5/1, v/v), 105 mg, Yield: 82%.

$^1\text{H}$  NMR (400 MHz,  $\text{CDCl}_3$ ):  $\delta$  7.47-7.44 (m, 2 H), 6.43-6.40 (m, 2 H), 3.99 (s, 3 H).

$^{13}\text{C}$  NMR (100 MHz,  $\text{CDCl}_3$ ):  $\delta$  144.69, 138.25, 116.58, 115.75, 81.58, 32.46.

These spectroscopic data are in good agreement with the literature data.<sup>S2</sup>

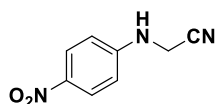

((4-nitrophenyl)amino)acetonitrile (**2i**): Not detected.

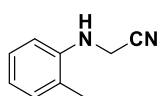

2-(*o*-tolylamino)acetonitrile (**2j**): a white solid was obtained after column chromatography (SiO<sub>2</sub>, 1.5 cm × 25 cm) using Petroleum ether/EtOAc (20/1, v/v), 64 mg, Yield: 88%.

<sup>1</sup>H NMR (400 MHz, CDCl<sub>3</sub>): δ 7.20-7.16 (m, 1 H), 7.10-7.08 (m, 1 H), 6.82-6.78 (m, 1 H), 6.66-6.64 (m, 1 H), 4.04-4.02 (m, 2 H), 3.89 (s, 1 H), 2.10 (s, 3 H).

<sup>13</sup>C NMR (100 MHz, CDCl<sub>3</sub>): δ 143.27, 130.72, 127.38, 123.53, 119.60, 117.51, 117.47, 110.44, 32.45, 17.37.

These spectroscopic data are in good agreement with the literature data.<sup>S2</sup>

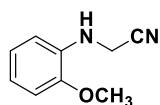

((2-methoxyphenyl)amino)acetonitrile (**2k**): a yellow liquid was obtained after column chromatography (SiO<sub>2</sub>, 1.5 cm × 25 cm) using Petroleum ether/EtOAc (5/1, v/v), 73 mg, Yield: 90%.

<sup>1</sup>H NMR (400 MHz, CDCl<sub>3</sub>): δ 6.95-6.90 (m, 1 H), 6.85-6.80 (m, 2 H), 6.69-6.67 (m, 1 H), 4.57 (s, 1 H), 4.07 (s, 2 H), 3.82 (s, 3 H)

<sup>13</sup>C NMR (100 MHz, CDCl<sub>3</sub>): δ 147.54, 135.06, 121.32, 119.43, 117.14, 110.86, 110.09, 55.58, 32.36.

These spectroscopic data are in good agreement with the literature data.<sup>S4</sup>

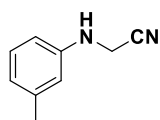

(*m*-tolylamino)acetonitrile (**2l**): a yellow liquid was obtained after column chromatography (SiO<sub>2</sub>, 1.5 cm × 25 cm) using Petroleum ether/EtOAc (5/1, v/v), 69 mg, Yield: 95%.

<sup>1</sup>H NMR (400 MHz, CDCl<sub>3</sub>): δ 7.15-7.11 (m, 1 H), 6.70-6.78 (m, 1 H), 6.49-6.46 (m, 2 H), 3.97-3.94 (m, 3 H), 2.30 (s, 3 H);

<sup>13</sup>C NMR (100 MHz, CDCl<sub>3</sub>): δ 145.23, 139.54, 129.48, 120.93, 117.37, 114.45, 110.77, 32.64, 21.65.

These spectroscopic data are in good agreement with the literature data.<sup>S2</sup>

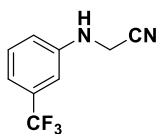

((3-(trifluoromethyl)phenyl)amino)acetonitrile (**2m**): a yellow liquid was obtained after column chromatography (SiO<sub>2</sub>, 1.5 cm × 25 cm) using Petroleum ether/EtOAc (4/1, v/v), 84 mg, Yield: 84%.

<sup>1</sup>H NMR (400 MHz, CDCl<sub>3</sub>): δ 7.36-7.32 (m, 1 H), 7.11-7.09 (m, 1 H), 6.89-6.88 (m, 1 H), 6.84-6.81 (m, 1 H), 4.34-4.09 (m, 3 H).

<sup>13</sup>C NMR (100 MHz, CDCl<sub>3</sub>): δ 145.45, 145.43, 132.00, 131.68, 130.15, 128.14, 125.44, 122.73, 120.02, 116.72, 116.69, 116.47, 116.42, 116.40, 116.35, 110.06, 110.02, 32.31.

<sup>19</sup>F NMR (376 MHz, CDCl<sub>3</sub>): δ -62.86-(-62.89) (m)

These spectroscopic data are in good agreement with the literature data.<sup>S5</sup>

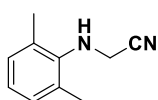

((2,6-dimethylphenyl)amino)acetonitrile (**2n**): a light yellow liquid was obtained after column chromatography (SiO<sub>2</sub>, 1.5 cm × 25 cm) using Petroleum ether/EtOAc (5/1, v/v), 60mg, Yield: 75 %.

<sup>1</sup>H NMR (400 MHz, CDCl<sub>3</sub>): δ 7.05-7.03 (m, 2 H), 6.95-6.91 (m, 1 H), 3.90 (s, 2 H), 3.42 (s, 1 H), 2.32 (s, 6 H).

<sup>13</sup>C NMR (100 MHz, CDCl<sub>3</sub>): δ 142.44, 130.87, 129.22, 124.26, 117.97, 36.16, 18.20.

These spectroscopic data are in good agreement with the literature data.<sup>S2</sup>

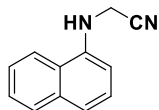

2-(naphthalen-1-ylamino)acetonitrile (**2o**): a light yellow liquid was obtained after column chromatography (SiO<sub>2</sub>, 1.5 cm × 25 cm) using Petroleum ether/EtOAc (5/1, v/v), 77mg, Yield: 85%.

$^1\text{H}$  NMR (400 MHz,  $\text{CDCl}_3$ ):  $\delta$  7.81-7.79 (m, 1 H), 7.69-7.67 (m, 1 H), 7.46-7.36 (m, 4 H), 6.67-6.63 (m, 1 H), 4.59 (s, 1 H), 4.13 (s, 2 H).

$^{13}\text{C}$  NMR (100 MHz,  $\text{CDCl}_3$ ):  $\delta$  140.45, 134.30, 128.85, 126.29, 126.24, 125.58, 123.89, 120.33, 120.30, 119.84, 117.16, 105.95, 32.70.

These spectroscopic data are in good agreement with the literature data.<sup>S3</sup>

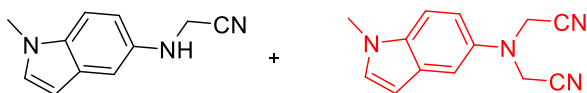

(**2p:2p'**)2-((1-methyl-1H-indol-5-yl)amino)acetonitrile:2,2'-((1-methyl-1H-indol-5-yl)azanediyl)diacetonitrile(1:1.5), a yellow liquid was obtained after column chromatography ( $\text{SiO}_2$ , 1.5 cm  $\times$  25 cm) using Petroleum ether/EtOAc (2/1, v/v), 95 mg, Yield: 93%.

$^1\text{H}$  NMR (500 MHz,  $\text{CDCl}_3$ ):  $\delta$  7.36 (d,  $J$  = 2.0 Hz, 1 H), 7.31-7.29 (m, 1 H), 7.22-7.20 (m, 0.65 H), 7.09 (d,  $J$  = 3.1 Hz, 1 H), 7.01-6.96 (m, 1.65 H), 6.96 (d,  $J$  = 2.5 Hz, 1 H), 6.71-6.69 (m, 0.65 H), 6.46-6.45 (m, 1 H), 6.37 (m, 0.65 H), 4.17 (s, 4 H), 4.11 (s, 1 H), 3.78 (s, 3 H), 3.74 (s, 2 H).

$^{13}\text{C}$  NMR (126 MHz,  $\text{CDCl}_3$ ):  $\delta$  139.49, 138.59, 134.52, 132.56, 130.48, 129.66, 129.21, 128.92, 117.70, 115.94, 115.20, 112.51, 112.07, 110.61, 110.42, 104.61, 101.18, 100.24, 43.06, 34.45, 33.16, 33.07.

HR-MS (ESI): Calcd. 225.1135 for  $\text{C}_{13}\text{H}_{13}\text{N}_4^+[\text{M}+\text{H}]^+$ , found: 225.1131 and Calcd. 186.1026 for  $\text{C}_{11}\text{H}_{12}\text{N}_3^+[\text{M}+\text{H}]^+$ , found: 186.1026.

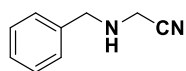

2-(benzylamino)acetonitrile (**2q**): a yellow liquid was obtained after column chromatography ( $\text{SiO}_2$ , 1.5 cm  $\times$  25 cm) using Petroleum ether/EtOAc (5/1, v/v), 66 mg, Yield: 90%.

$^1\text{H}$  NMR (400 MHz,  $\text{CDCl}_3$ ):  $\delta$  7.36-7.25 (m, 5 H), 3.91 (s, 2 H), 3.54 (s, 2 H), 1.70 (s, 1 H)

$^{13}\text{C}$  NMR (100 MHz,  $\text{CDCl}_3$ ):  $\delta$  137.86, 128.69, 128.48, 127.73, 117.74, 52.35, 36.30.

These spectroscopic data are in good agreement with the literature data.<sup>S3</sup>

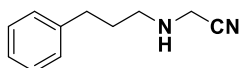

2-((3-phenylpropyl)amino)acetonitrile (**2r**): a yellow liquid was obtained after column chromatography (SiO<sub>2</sub>, 1.5 cm × 25 cm) using Petroleum ether/EtOAc (5/1, v/v), 61 mg, Yield: 70%.

<sup>1</sup>H NMR (400 MHz, CDCl<sub>3</sub>): δ 7.30-7.26 (m, 2 H), 7.21-7.16 (m, 3 H), 3.53 (s, 2 H), 2.72 (t, *J* = 7.08 Hz, 2 H), 2.67 (t, *J* = 7.32 Hz, 2 H), 1.84-1.77 (m, 2H), 1.35 (s, 1 H).

<sup>13</sup>C NMR (100 MHz, CDCl<sub>3</sub>): δ 141.67, 128.49, 128.44, 126.03, 117.97, 48.28, 37.33, 33.33, 31.11.

HR-MS (ESI): Calcd. 175.1230 for C<sub>11</sub>H<sub>15</sub>N<sub>2</sub>[M+H]<sup>+</sup>, found: 175.1232.

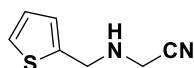

2-((thiophen-2-ylmethyl)amino)acetonitrile(**2s**): a yellow liquid was obtained after column chromatography (SiO<sub>2</sub>, 1.5 cm × 25 cm) using Petroleum ether/EtOAc (5/1, v/v), 50 mg, Yield: 66%.

<sup>1</sup>H NMR (400 MHz, CDCl<sub>3</sub>): δ 7.28-7.26 (m, 1 H), 7.01-7.00 (m, 1 H), 6.98-6.96 (m, 1 H), 4.13 (s, 2 H), 3.59 (s, 2 H), 1.80 (s, 1 H).

<sup>13</sup>C NMR (100 MHz, CDCl<sub>3</sub>) δ 141.09, 126.85, 126.37, 125.58, 117.49, 46.95, 35.90.

HR-MS (ESI): Calcd. 153.0481 for C<sub>7</sub>H<sub>9</sub>N<sub>2</sub>S<sup>+</sup>[M+H]<sup>+</sup>, found: 153.0485.

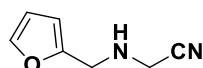

((furan-2-ylmethyl)amino)acetonitrile (**2t**): a yellow liquid was obtained after column chromatography (SiO<sub>2</sub>, 1.5 cm × 25 cm) using Petroleum ether/EtOAc (5/1, v/v), 43 mg, Yield: 64%.

<sup>1</sup>H NMR (400 MHz, CDCl<sub>3</sub>): δ 7.40 (s, 1 H), 6.34-6.28 (m, 2 H), 3.93 (s, 2 H), 3.58 (s, 2 H), 1.80 (s, 1 H).

<sup>13</sup>C NMR (100 MHz, CDCl<sub>3</sub>) δ 141.09, 126.85, 126.37, 125.58, 117.49, 46.95, 35.90.

HR-MS (ESI): Calcd. 137.0709 for C<sub>7</sub>H<sub>9</sub>N<sub>2</sub>O<sup>+</sup>[M+H]<sup>+</sup>, found: 137.0710.

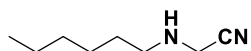

2-(hexylamino)acetonitrile (**2u**): a yellow liquid was obtained after column chromatography (SiO<sub>2</sub>, 1.5 cm × 25 cm) using Petroleum ether/EtOAc (5/1, v/v), 44 mg, Yield: 57%.

<sup>1</sup>H NMR (400 MHz, CDCl<sub>3</sub>): δ 3.60 (s, 2 H), 2.73 (t, *J* = 7.08 Hz, 2 H), 1.52-1.46 (m, 2 H), 1.34-1.30 (m, 6 H), 1.25 (s, 1 H), 0.91-0.88 (m, 3 H).

<sup>13</sup>C NMR (100 MHz, CDCl<sub>3</sub>): δ 117.93, 48.91, 37.36, 31.62, 29.43, 26.77, 22.57, 14.02.

HR-MS (ESI): Calcd. 141.1386 for C<sub>8</sub>H<sub>17</sub>N<sub>2</sub> [M+H]<sup>+</sup>, found: 141.1389.

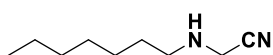

2-(heptylamino)acetonitrile (**2v**): a yellow liquid was obtained after column chromatography (SiO<sub>2</sub>, 1.5 cm × 25 cm) using Petroleum ether/EtOAc (5/1, v/v), 50.5 mg, Yield: 60%.

<sup>1</sup>H NMR (400 MHz, CDCl<sub>3</sub>): δ 3.59 (s, 2 H), 2.74-2.70 (m, 2 H), 1.53-1.48 (m, 2 H), 1.36-1.27 (m, 8 H), 0.90-0.86 (m, 3 H).

<sup>13</sup>C NMR (100 MHz, CDCl<sub>3</sub>): δ 117.96, 48.88, 37.33, 31.73, 29.45, 29.07, 27.03, 22.57, 14.04.

HR-MS (ESI): Calcd. 155.1543 for C<sub>9</sub>H<sub>19</sub>N<sub>2</sub><sup>+</sup> [M+H]<sup>+</sup>, found: 155.1536.

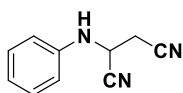

2-(phenylamino)succinonitrile (**3a**): a yellow solid was obtained after column chromatography (SiO<sub>2</sub>, 1.5 cm × 25 cm) using *n*-Hexane/EtOAc (3/1, v/v), 67.5 mg, Yield: 79%, m.p. 119-120 °C.

<sup>1</sup>H NMR (400 MHz, DMSO-*d*<sub>6</sub>): δ 7.24-7.20 (m, 2 H), 6.81-6.77 (m, 3 H), 6.47 (d, *J* = 10.04 Hz, 1 H), 5.11-5.05 (m, 1 H), 3.33-3.21 (m, 2 H).

<sup>13</sup>C NMR (100 MHz, DMSO-*d*<sub>6</sub>): δ 145.79, 129.71, 119.50, 119.07, 117.47, 114.37, 42.18, 21.90.

DEPT135: 129.71, 119.50, 114.37, 42.17, -21.90.

HR-MS (ESI): Calcd. 194.0689 for  $C_{10}H_9N_3Na^+ [M+Na]^+$ , found: 194.0680.

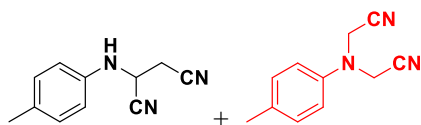

(**3b** : **3b'**): 2-(*p*-tolylamino)succinonitrile : 2,2'-(*p*-tolylazanediyl)diacetonitrile (1:1), a yellow liquid was obtained after column chromatography ( $SiO_2$ , 1.5 cm  $\times$  25 cm) using Petroleum ether/EtOAc (3/1, v/v), 47.5 mg, Yield: 60%.

$^1H$  NMR (400 MHz,  $CDCl_3$ ):  $\delta$  7.17-7.15 (m, 2 H), 7.07-7.04 (m, 2 H), 6.87-6.84 (m, 2 H), 6.66-6.63 (m, 2 H), 4.54-4.46 (m, 1 H), 4.22-4.13 (m, 5 H), 2.93-2.91 (m, 2 H), 2.28 (d,  $J$  = 13.7 Hz 6 H).

$^{13}C$  NMR (100 MHz,  $CDCl_3$ ):  $\delta$  142.94, 141.26, 132.94, 130.88, 130.86, 130.29, 118.45, 117.39, 117.18, 117.08, 115.40, 115.37, 115.20, 115.18, 43.38, 41.20, 22.72, 20.57.

HR-MS (ESI): Calcd. 208.0845 for  $C_{11}H_{11}N_3Na^+ [M+Na]^+$ , found: 208.0840.

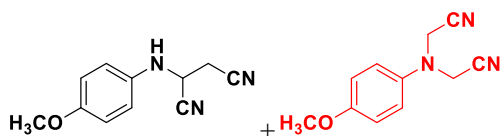

(**3c** : **3c'**) 2-((4-methoxyphenyl)amino)succinonitrile : 2,2'-((4-methoxyphenyl)azanediyl)diacetonitrile (1.2 : 1), a yellow liquid was obtained after column chromatography ( $SiO_2$ , 1.5 cm  $\times$  25 cm) using Petroleum ether/EtOAc (3/1, v/v), 30 mg, Yield: 30%.

$^1H$  NMR (400 MHz,  $CDCl_3$ ):  $\delta$  7.02-7.99 (m, 2.2 H), 6.91-6.83 (m, 4 H), 6.78-6.75 (m, 1.8 H), 4.48-4.43 (m, 1 H), 4.11-4.04 (m, 5 H), 3.80-3.76 (m, 6 H), 2.98 (d,  $J$  = 6.48 Hz 2 H).

$^{13}C$  NMR (100 MHz,  $CDCl_3$ ):  $\delta$  156.62, 155.02, 139.29, 137.09, 121.91, 120.79, 117.83, 117.31, 115.14, 115.01, 114.92, 114.27, 55.65, 55.60, 44.56, 42.19, 22.90.

HR-MS (ESI): Calcd. 224.0794 for  $C_{11}H_{11}N_3NaO^+ [M+Na]^+$ , found: 224.0797.

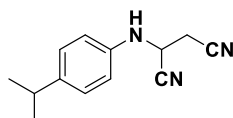



2-((4-isopropylphenyl)amino)succinonitrile (**3d**): a yellow liquid was obtained after column chromatography (SiO<sub>2</sub>, 1.5 cm × 25 cm) using Petroleum ether/EtOAc (3/1, v/v), 49mg, Yield: 46%.

<sup>1</sup>H NMR (400 MHz, DMSO-*d*<sub>6</sub>): δ 7.11-7.07 (m, 2 H), 6.75-6.71 (m, 2 H), 6.28 (d, *J* = 10.28 Hz, 1 H), 5.06-4.99 (m, 1 H), 3.30-3.18 (m, 2 H), 2.84-2.73 (m, 1 H), 1.16 (d, *J* = 6.84 Hz, 6 H).

<sup>13</sup>C NMR (100 MHz, DMSO-*d*<sub>6</sub>): δ 143.71, 139.53, 127.43, 119.22, 117.48, 114.49, 42.46, 33.04, 24.59, 24.56, 21.93.

HR-MS (ESI): Calcd. 236.1158 for C<sub>13</sub>H<sub>15</sub>N<sub>3</sub>Na<sup>+</sup> [M+Na]<sup>+</sup>, found: 236.1154.

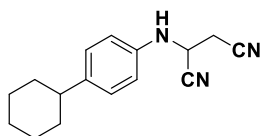

2-((2,3-dichlorophenyl)amino)succinonitrile (**3e**): a yellow solid was obtained after column chromatography (SiO<sub>2</sub>, 1.5 cm × 25 cm) using *n*-Hexane/EtOAc (3/1, v/v), 73.5 mg, Yield: 58%, m.p. 117-118 °C.

<sup>1</sup>H NMR (400 MHz, DMSO-*d*<sub>6</sub>): δ 7.08-7.05 (m, 2 H), 6.74-6.70 (m, 2 H), 6.28 (d, *J* = 10.16 Hz, 1 H), 5.05-4.99 (m, 1 H), 3.30-3.17 (m, 2 H), 2.41-2.35 (m, 1 H), 1.79-1.66 (m, 5 H), 1.40-1.22 (m, 5 H).

<sup>13</sup>C NMR (100 MHz, DMSO-*d*<sub>6</sub>): δ 143.72, 138.84, 127.78, 119.22, 117.48, 114.45, 43.40, 42.43, 34.70, 26.92, 26.12, 21.94.

HR-MS (ESI): Calcd. 276.1471 for C<sub>16</sub>H<sub>19</sub>N<sub>3</sub>Na<sup>+</sup> [M+Na]<sup>+</sup>, found: 276.1479.

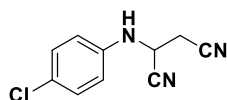

2-((4-chlorophenyl)amino)succinonitrile (**3f**): a yellow solid was obtained after column chromatography (SiO<sub>2</sub>, 1.5 cm × 25 cm) using *n*-Hexane/EtOAc (3/1, v/v), 67 mg, Yield: 65%, m.p. 89-90 °C.

<sup>1</sup>H NMR (400 MHz, DMSO-*d*<sub>6</sub>): δ 7.28-7.24 (m, 2 H), 6.84-6.80 (m, 2 H), 6.67 (d, *J* = 9.8 Hz, 1 H), 5.13-5.07 (m, 1 H), 3.34-3.22 (m, 2 H).

$^{13}\text{C}$  NMR (100 MHz,  $\text{DMSO-}d_6$ ):  $\delta$  144.77, 129.46, 123.03, 118.79, 117.37, 115.88, 42.21, 21.82.

HR-MS (ESI): Calcd. 228.0299 for  $\text{C}_{10}\text{H}_8\text{ClN}_3\text{Na}^+ [\text{M}+\text{Na}]^+$ , found: 228.0291.

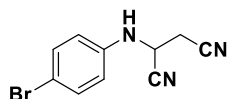

2-((4-bromophenyl)amino)succinonitrile (**3g**): a yellow solid was obtained after column chromatography ( $\text{SiO}_2$ , 1.5 cm  $\times$  25 cm) using *n*-Hexane/EtOAc (3/1, v/v), 84 mg, Yield: 68%, m.p. 98-99  $^\circ\text{C}$ .

$^1\text{H}$  NMR (400 MHz,  $\text{DMSO-}d_6$ ):  $\delta$  7.40-7.36 (m, 2 H), 6.80-6.76 (m, 2 H), 6.69 (d,  $J$  = 9.8 Hz, 1 H), 5.12-5.06 (m, 1 H), 3.34-3.22 (m, 2 H).

$^{13}\text{C}$  NMR (100 MHz,  $\text{DMSO-}d_6$ ):  $\delta$  145.15, 132.30, 118.74, 117.35, 116.37, 110.61, 42.13, 21.83.

HR-MS (ESI): Calcd. 271.9706 for  $\text{C}_{10}\text{H}_8\text{BrN}_3\text{Na}^+ [\text{M}+\text{Na}]^+$ , found: 271.9708.

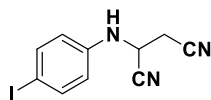

2-((4-iodophenyl)amino)succinonitrile (**3h**): a yellow solid was obtained after column chromatography ( $\text{SiO}_2$ , 1.5 cm  $\times$  25 cm) using *n*-Hexane/EtOAc (3/1, v/v), 111 mg, Yield: 75%, m.p. 117-118  $^\circ\text{C}$ .

$^1\text{H}$  NMR (400 MHz,  $\text{DMSO-}d_6$ ):  $\delta$  7.54-7.50 (m, 2 H), 6.69-6.65 (m, 3 H), 5.11-5.05 (m, 1 H), 3.33-3.21 (m, 2 H).

$^{13}\text{C}$  NMR (100 MHz,  $\text{DMSO-}d_6$ ):  $\delta$  145.61, 138.06, 118.74, 117.35, 116.90, 81.20, 41.98, 21.81.

HR-MS (ESI): Calcd. 319.9655 for  $\text{C}_{10}\text{H}_8\text{IN}_3\text{Na}^+ [\text{M}+\text{Na}]^+$ , found: 319.9647.

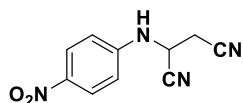

2-((4-nitrophenyl)amino)succinonitrile (**3i**): Not detected.

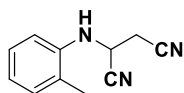

2-(o-tolylamino)succinonitrile (**3j**): a yellow solid was obtained after column chromatography (SiO<sub>2</sub>, 1.5 cm × 25 cm) using *n*-Hexane/EtOAc (3/1, v/v), 65 mg, Yield: 70%, m.p. 149-150 °C.

<sup>1</sup>H NMR (400 MHz, DMSO-*d*<sub>6</sub>): δ 7.15-7.08 (m, 2 H), 6.82-6.73 (m, 2 H), 5.66 (d, *J* = 10.4 Hz, 1 H), 5.12-5.05 (m, 1 H), 3.37-3.35 (m, 2 H), 2.15 (s, 3 H).

<sup>13</sup>C NMR (100 MHz, DMSO-*d*<sub>6</sub>): δ 143.62, 130.89, 127.32, 124.54, 119.67, 119.21, 117.55, 112.23, 42.22, 21.81, 18.01.

HR-MS (ESI): Calcd. 208.0845 for C<sub>11</sub>H<sub>10</sub>N<sub>3</sub>Na<sup>+</sup>[M+Na]<sup>+</sup>, found: 208.0838.

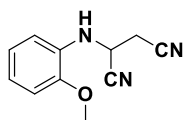

2-((2-methoxyphenyl)amino)succinonitrile (**3k**): a yellow solid was obtained after column chromatography (SiO<sub>2</sub>, 1.5 cm × 25 cm) using *n*-Hexane/EtOAc (3/1, v/v), 57 mg, Yield: 57%, m.p. 108-109 °C.

<sup>1</sup>H NMR (400 MHz, DMSO-*d*<sub>6</sub>): δ 6.95-6.77 (m, 4 H), 5.87 (d, *J* = 10.88 Hz, 1 H), 5.15-5.08 (m, 1 H), 3.82 (s, 3 H), 3.38 (d, *J* = 7.6 Hz, 2 H).

<sup>13</sup>C NMR (100 MHz, DMSO-*d*<sub>6</sub>): δ 147.91, 134.92, 121.40, 119.67, 119.09, 117.63, 112.38, 111.12, 55.93, 41.95, 21.53.

HR-MS (ESI): Calcd. 224.0794 for C<sub>11</sub>H<sub>11</sub>N<sub>3</sub>NaO<sup>+</sup> [M+Na]<sup>+</sup>, found: 224.0790.

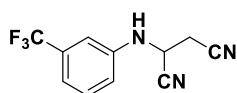

2-((3-(trifluoromethyl)phenyl)amino)succinonitrile (**3l**): a yellow liquid was obtained after column chromatography (SiO<sub>2</sub>, 1.5 cm × 25 cm) using *n*-Hexane/EtOAc (3/1, v/v), 61 mg, Yield: 51%.

<sup>1</sup>H NMR (400 MHz, DMSO-*d*<sub>6</sub>): δ 7.47-7.43 (m, 1 H), 7.14-7.08 (m, 3 H), 7.00 (d, *J* = 9.64 Hz, 1 H), 5.30-5.25 (m, 1 H), 3.37-3.26 (m, 2 H).

$^{13}\text{C}$  NMR (100 MHz,  $\text{DMSO}-d_6$ ):  $\delta$  146.47, 131.06-130.12(m), 130.76, 128.78-120.66 (m), 118.68, 117.94, 117.31, 115.58-115.46 (m), 110.23-110.15 (m), 41.91, 21.83.

$^{19}\text{F}$  NMR (376 MHz,  $\text{DMSO}-d_6$ ):  $\delta$  -61.36-(-61.40) (m).

HR-MS (ESI): Calcd. 240.0743 for  $\text{C}_{11}\text{H}_9\text{F}_3\text{N}_3^+$   $[\text{M}+\text{H}]^+$ , found: 240.0750.

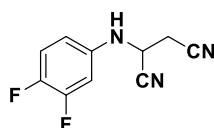

2-((3,4-difluorophenyl)amino)succinonitrile (**3m**): a yellow solid was obtained after column chromatography ( $\text{SiO}_2$ , 1.5 cm  $\times$  25 cm) using *n*-Hexane/EtOAc (3/1, v/v), 67 mg, Yield: 65%, m.p. 81-82  $^\circ\text{C}$ .

$^1\text{H}$  NMR (400 MHz,  $\text{DMSO}-d_6$ ):  $\delta$  7.31-7.24 (m, 1 H), 6.92-6.86 (m, 1 H), 6.72 (d,  $J$  = 9.92 Hz, 1 H), 6.64-6.61 (m, 1 H), 5.13-5.07 (m, 1 H), 3.31-3.27 (m, 2 H).

$^{13}\text{C}$  NMR (100 MHz,  $\text{DMSO}-d_6$ ):  $\delta$  150.38 (dd,  $J$  = 996.84, 53.96 Hz, ), 144.59 (d,  $J$  = 51.04 Hz), 143.33-143.22 (m), 142.25, (d,  $J$  = 51.04 Hz), 118.34 (d,  $J$  = 65.6 Hz), 117.99 (d,  $J$  = 552.68 Hz), 110.43-110.34 (m), 103.11 (d,  $J$  = 84.56 Hz), 112.23, 42.49, 21.81.

$^{19}\text{F}$  NMR (376 MHz,  $\text{DMSO}-d_6$ ):  $\delta$  -137.43-(-137.49) (m), -151.37-(-151.43) (m).

HR-MS (ESI): Calcd. 230.0500 for  $\text{C}_{10}\text{H}_7\text{F}_2\text{N}_3\text{Na}^+$   $[\text{M}+\text{Na}]^+$ , found: 230.0490.

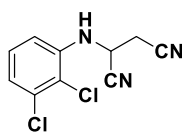

2-((2,3-dichlorophenyl)amino)succinonitrile (**3n**): a yellow solid was obtained after column chromatography ( $\text{SiO}_2$ , 1.5 cm  $\times$  25 cm) using *n*-Hexane/EtOAc (3/1, v/v), 74 mg, Yield: 62%, m.p. 132-133  $^\circ\text{C}$ .

$^1\text{H}$  NMR (400 MHz,  $\text{DMSO}-d_6$ ):  $\delta$  7.32-7.28 (m, 1 H), 7.09-7.01 (m, 2 H), 6.54 (d,  $J$  = 10 Hz, 1 H), 5.33-5.27 (m, 1 H), 3.51-3.41 (m, 2 H).

$^{13}\text{C}$  NMR (100 MHz,  $\text{DMSO}-d_6$ ):  $\delta$  143.62, 132.77, 129.15, 120.74, 118.49, 118.03, 117.32, 112.17, 42.01, 21.45.

HR-MS (ESI): Calcd. 261.9909 for  $\text{C}_{10}\text{H}_7\text{Cl}_2\text{N}_3\text{Na}^+$   $[\text{M}+\text{Na}]^+$ , found: 261.9900.

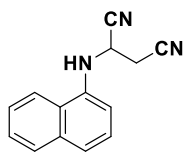

2-(naphthalen-1-ylamino)succinonitrile (**3o**): a yellow solid was obtained after column chromatography (SiO<sub>2</sub>, 1.5 cm × 25 cm) using *n*-Hexane/EtOAc (3/1, v/v), 74 mg, Yield: 67%, m.p. 99-100 °C.

<sup>1</sup>H NMR (400 MHz, DMSO-*d*<sub>6</sub>): δ 8.15-8.13 (m, 1 H), 7.88-7.85 (m, 1 H), 7.54-7.51 (m, 2 H), 7.45-7.39 (m, 2 H), 6.88-6.84 (m, 2 H), 5.30-5.24 (m, 1 H), 3.49-3.47 (m, 2 H).

<sup>13</sup>C NMR (100 MHz, DMSO-*d*<sub>6</sub>): δ 141.14, 134.40, 128.71, 126.78, 126.66, 125.52, 124.15, 121.93, 119.75, 119.05, 117.57, 106.92, 42.34, 21.83.

HR-MS (ESI): Calcd. 244.0845 for C<sub>14</sub>H<sub>11</sub>N<sub>3</sub>Na<sup>+</sup> [M+Na]<sup>+</sup>, found: 244.0838.

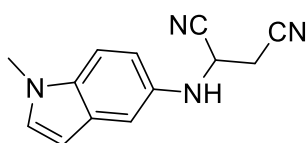

2-((1-methyl-1H-indol-5-yl)amino)succinonitrile (**3p**): a yellow liquid was obtained after column chromatography (SiO<sub>2</sub>, 1.5 cm × 25 cm) using *n*-Hexane/EtOAc (2/1, v/v), 56 mg, Yield: 50%.

<sup>1</sup>H NMR (500 MHz, CDCl<sub>3</sub>): δ 7.34-6.94 (m, 5 H), 4.2 (s, 2 H), 3.80-3.72 (m, 5 H).

<sup>13</sup>C NMR (126 MHz, CDCl<sub>3</sub>) δ 139.82, 134.88, 129.04, 126.94, 116.56, 115.00, 111.24, 109.89, 103.15, 100.51, 43.01, 33.21, 14.41.

HR-MS (ESI): Calcd. 225.1135 for C<sub>13</sub>H<sub>13</sub>N<sub>4</sub><sup>+</sup> [M+H]<sup>+</sup>, found: 225.1133.

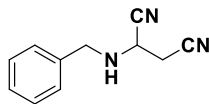

2-(benzylamino)succinonitrile (**3q**): a yellow liquid was obtained after column chromatography (SiO<sub>2</sub>, 1.5 cm × 25 cm) using *n*-Hexane/EtOAc (3/1, v/v), 46 mg, Yield: 50%.

<sup>1</sup>H NMR (400 MHz, CDCl<sub>3</sub>): δ 7.37-7.31 (m, 6 H), 4.12-4.09 (m, 1 H), 3.89-3.78 (m, 2 H), 2.89-2.78 (m, 2 H).

$^{13}\text{C}$  NMR (100 MHz,  $\text{CDCl}_3$ ):  $\delta$  137.04, 128.86, 128.45, 128.08, 117.24, 115.06, 51.33, 45.57, 23.19.

HR-MS (ESI): Calcd. 208.0845 for  $\text{C}_{11}\text{H}_{10}\text{N}_3\text{Na}^+[\text{M}+\text{Na}]^+$ , found: 208.0856.

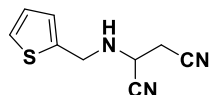

2-((thiophen-2-ylmethyl)amino)succinonitrile (**3r**): a yellow liquid was obtained after column chromatography ( $\text{SiO}_2$ , 1.5 cm  $\times$  25 cm) using *n*-Hexane/EtOAc (3/1, v/v), 23 mg, Yield: 30%.

$^1\text{H}$  NMR (400 MHz,  $\text{CDCl}_3$ ):  $\delta$  7.32-7.31 (m, 1 H), 7.07-7.05 (m, 1 H), 7.01-6.99 (m, 1 H), 4.34-4.30 (m, 1 H), 4.18-4.14 (m, 1 H), 3.89 (t,  $J$  = 6.4 Hz, 1 H), 2.89-2.87 (m, 2 H), 2.04 (s, 1 H).

$^{13}\text{C}$  NMR (100 MHz,  $\text{CDCl}_3$ ):  $\delta$  140.13, 126.99, 126.76, 126.05, 116.99, 114.89, 46.16, 45.06, 23.19.

HR-MS (ESI): Calcd. 192.0590 for  $\text{C}_9\text{H}_{10}\text{N}_3\text{S}^+[\text{M}+\text{H}]^+$ , found: 192.0593.

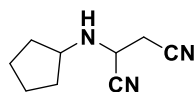

2-(cyclopentylamino)succinonitrile (**3s**): a yellow liquid was obtained after column chromatography ( $\text{SiO}_2$ , 1.5 cm  $\times$  25 cm) using *n*-Hexane/EtOAc (3/1, v/v), 29 mg, Yield: 31%.

$^1\text{H}$  NMR (400 MHz,  $\text{CDCl}_3$ ):  $\delta$  3.75 (t,  $J$  = 6.4 Hz, 1 H), 3.32-3.25 (m, 1 H), 2.83-2.74 (m, 2 H), 1.90-1.84 (m, 1 H), 1.76-1.64 (m, 3 H), 1.57-1.50 (m, 2 H), 1.38-1.28 (m, 2 H), 1.22-1.18 (m, 1 H).

$^{13}\text{C}$  NMR (101 MHz,  $\text{CDCl}_3$ ):  $\delta$  117.97, 115.31, 57.92, 45.55, 33.63, 32.09, 23.85, 23.81, 23.69.

HR-MS (ESI): Calcd. 164.1182 for  $\text{C}_9\text{H}_{14}\text{N}_3^+[\text{M}+\text{H}]^+$ , found: 164.1180.

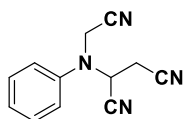

2-((cyanomethyl)(phenyl)amino)succinonitrile (**5a**): a yellow liquid was obtained after column chromatography ( $\text{SiO}_2$ , 1.5 cm  $\times$  25 cm) using *n*-Hexane/EtOAc (3/1, v/v), 97.5 mg, Yield: 93%.

$^1\text{H}$  NMR (400 MHz,  $\text{CDCl}_3$ ):  $\delta$  7.48-7.44 (m, 2 H), 7.37-7.31 (m, 3 H), 4.68-4.65 (m, 1 H), 4.26-4.15 (m, 2 H), 2.96-2.85 (m, 2 H).

$^{13}\text{C}$  NMR (100 MHz,  $\text{CDCl}_3$ ):  $\delta$  143.48, 130.45, 127.48, 123.59, 114.91, 114.67, 114.27, 50.84, 41.60, 21.89.

DEPT135: 130.58, 127.49, 123.60, 50.84, -41.61, -21.89.

HR-MS (ESI): Calcd. 233.0798 for  $\text{C}_{12}\text{H}_{10}\text{N}_4\text{Na}^+ [\text{M}+\text{Na}]^+$ , found: 233.0803.

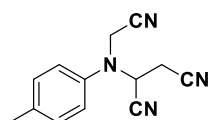

2-((cyanomethyl)(p-tolyl)amino)succinonitrile (**5b**): a yellow liquid was obtained after column chromatography ( $\text{SiO}_2$ , 1.5 cm  $\times$  25 cm) using *n*-Hexane/EtOAc (3/1, v/v), 99.5 mg, Yield: 89%.

$^1\text{H}$  NMR (400 MHz,  $\text{DMSO}-d_6$ ):  $\delta$  7.23-7.21 (m, 2 H), 7.12-7.10 (m, 2 H), 5.51-5.47 (m, 1 H), 4.71-4.54 (m, 2 H), 3.46-3.36 (m, 2 H), 2.28 (s, 3 H).

$^{13}\text{C}$  NMR (100 MHz,  $\text{DMSO}-d_6$ ):  $\delta$  142.90, 132.60, 130.45, 118.67, 116.87, 116.85, 116.29, 48.88, 37.35, 20.87, 20.58.

HR-MS (ESI): Calcd. 247.0954 for  $\text{C}_{13}\text{H}_{12}\text{N}_4\text{Na}^+ [\text{M}+\text{Na}]^+$ , found: 247.0947.

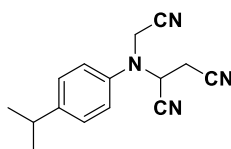

2-((cyanomethyl)(4-isopropylphenyl)amino)succinonitrile (**5c**): a yellow liquid was obtained after column chromatography ( $\text{SiO}_2$ , 1.5 cm  $\times$  25 cm) using *n*-Hexane/EtOAc (3/1, v/v), 101 mg, Yield: 80%.

$^1\text{H}$  NMR (400 MHz,  $\text{CDCl}_3$ ):  $\delta$  7.31-7.26 (m, 4 H), 4.62-4.58 (m, 1 H), 4.22-4.10 (m, 2 H), 2.96-2.86 (m, 3 H), 1.28-1.23 (m, 6 H).

$^{13}\text{C}$  NMR (100 MHz,  $\text{CDCl}_3$ ):  $\delta$  148.77, 140.95, 128.36, 124.31, 115.05, 114.87, 114.45, 51.06, 42.19, 33.70, 23.87, 21.92.

HR-MS (ESI): Calcd. 275.1267 for  $\text{C}_{15}\text{H}_{16}\text{N}_4\text{Na}^+ [\text{M}+\text{Na}]^+$ , found: 275.1259.

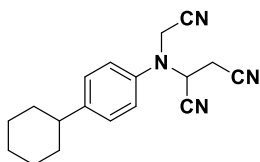

2-((cyanomethyl)(4-cyclohexylphenyl)amino)succinonitrile (**5d**): a yellow liquid was obtained after column chromatography (SiO<sub>2</sub>, 1.5 cm × 25 cm) using *n*-Hexane/EtOAc (3/1, v/v), 117 mg, Yield: 80%.

<sup>1</sup>H NMR (400 MHz, CDCl<sub>3</sub>): δ 7.29-7.24 (m, 4 H), 4.62-4.58 (m, 1 H), 4.22-4.10 (m, 2 H), 2.88-2.85 (m, 2 H), 2.54-2.49 (m, 1 H), 1.88-1.74 (m, 5 H), 1.44-1.27 (m, 5 H).

<sup>13</sup>C NMR (100 MHz, CDCl<sub>3</sub>): δ 147.94, 140.96, 128.71, 124.21, 115.06, 114.87, 114.45, 51.06, 44.04, 42.14, 34.34, 26.76, 26.02, 21.93.

HR-MS (ESI): Calcd. 315.1580 for C<sub>18</sub>H<sub>20</sub>N<sub>4</sub>Na<sup>+</sup> [M+Na]<sup>+</sup>, found: 315.1583.

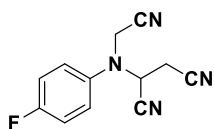

2-((cyanomethyl)(4-fluorophenyl)amino)succinonitrile (**5e**): a yellow liquid was obtained after column chromatography (SiO<sub>2</sub>, 1.5 cm × 25 cm) using *n*-Hexane/EtOAc (3/1, v/v), 97 mg, Yield: 85%.

<sup>1</sup>H NMR (400 MHz, DMSO-*d*<sub>6</sub>): δ 7.28-7.26 (m, 4 H), 5.49-5.45 (m, 1 H), 4.72-4.56 (m, 2 H), 3.46-3.37 (m, 2 H).

<sup>13</sup>C NMR (100 MHz, DMSO-*d*<sub>6</sub>): δ 158.81 (d, *J* = 956.6Hz), 141.76 (d, *J* = 10.0Hz), 121.19 (d, *J* = 33.52), 121.23, 121.15, 116.82-116.74 (m), 116.78, 116.56, 116.18, 49.31, 37.79, 20.89.

<sup>19</sup>F NMR (376 MHz, DMSO-*d*<sub>6</sub>): δ -120.06.

HR-MS (ESI): Calcd. 251.0703 for C<sub>12</sub>H<sub>9</sub>FN<sub>4</sub>Na<sup>+</sup> [M+Na]<sup>+</sup>, found: 251.0705.

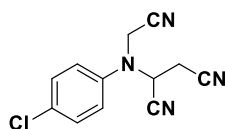

2-((4-chlorophenyl)(cyanomethyl)amino)succinonitrile (**5f**): a yellow liquid was obtained after column chromatography (SiO<sub>2</sub>, 1.5 cm × 25 cm) using *n*-Hexane/EtOAc (3/1, v/v), 110 mg, Yield: 90%.



$^1\text{H}$  NMR (400 MHz,  $\text{DMSO-}d_6$ ):  $\delta$  7.49-7.45 (m, 2 H), 7.24-7.20 (m, 2 H), 5.66-5.62 (m, 1 H), 4.79-4.63 (m, 2 H), 3.51-3.49 (m, 2 H).

$^{13}\text{C}$  NMR (100 MHz,  $\text{DMSO-}d_6$ ):  $\delta$  144.10, 129.81, 126.91, 119.34, 116.73, 116.63, 116.05, 48.32, 36.83, 20.69.

HR-MS (ESI): Calcd. 267.0408 for  $\text{C}_{12}\text{H}_9\text{ClN}_4\text{Na}^+$   $[\text{M}+\text{Na}]^+$ , found: 267.0401.

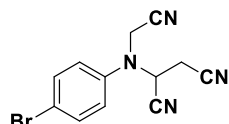

2-((4-bromophenyl)(cyanomethyl)amino)succinonitrile (**5g**): a yellow liquid was obtained after column chromatography ( $\text{SiO}_2$ , 1.5 cm  $\times$  25 cm) using *n*-Hexane/EtOAc (3/1, v/v), 129 mg, Yield: 90%.

$^1\text{H}$  NMR (400 MHz,  $\text{DMSO-}d_6$ ):  $\delta$  7.61-7.56 (m, 2 H), 7.18-7.14 (m, 2 H), 5.67-5.63 (m, 1 H), 4.79-4.64 (m, 2 H), 3.51-3.50 (m, 2 H).

$^{13}\text{C}$  NMR (100 MHz,  $\text{DMSO-}d_6$ ):  $\delta$  144.50, 132.69, 119.59, 116.72, 116.61, 116.03, 114.71, 48.19, 36.73, 20.67.

HR-MS (ESI): Calcd. 310.9903 for  $\text{C}_{12}\text{H}_9\text{BrN}_4\text{Na}^+$   $[\text{M}+\text{Na}]^+$ , found: 310.9894.

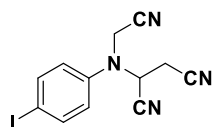

2-((cyanomethyl)(4-iodophenyl)amino)succinonitrile (**5h**): a yellow liquid was obtained after column chromatography ( $\text{SiO}_2$ , 1.5 cm  $\times$  25 cm) using *n*-Hexane/EtOAc (3/1, v/v), 117 mg, Yield: 70%.

$^1\text{H}$  NMR (400 MHz,  $\text{CDCl}_3$ ):  $\delta$  7.66-7.62 (m, 2 H), 6.93-6.89 (m, 2 H), 4.71-4.68 (m, 1 H), 4.12 (s, 2 H), 2.95-2.83 (m, 2 H).

$^{13}\text{C}$  NMR (100 MHz,  $\text{CDCl}_3$ ):  $\delta$  143.53, 139.29, 123.63, 115.33, 115.00, 114.94, 90.41, 50.07, 40.40, 21.69.

HR-MS (ESI): Calcd. 358.9764 for  $\text{C}_{12}\text{H}_9\text{IN}_4\text{Na}^+$   $[\text{M}+\text{Na}]^+$ , found: 358.9769.

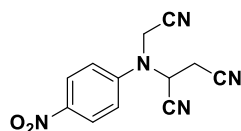

2-((cyanomethyl)(4-nitrophenyl)amino)succinonitrile (**5i**): Not detected.

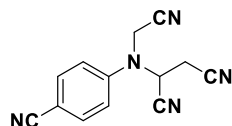

2-((cyanomethyl)(4-cyanophenyl)amino)succinonitrile (**5j**): Not detected.

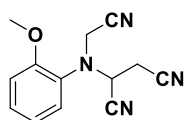

2-((cyanomethyl)(2-methoxyphenyl)amino)succinonitrile (**5k**): a yellow liquid was obtained after column chromatography (SiO<sub>2</sub>, 1.5 cm × 25 cm) using *n*-Hexane/EtOAc (3/1, v/v), 48 mg, Yield: 40%.

<sup>1</sup>H NMR (400 MHz, CDCl<sub>3</sub>): δ 7.34-7.29 (m, 2 H), 7.01-6.97 (m, 2H), 4.62-4.59 (m, 1 H), 4.24-4.13 (m, 2 H), 3.90 (s, 3 H), 2.98-2.84 (m, 2 H).

<sup>13</sup>C NMR (100 MHz, CDCl<sub>3</sub>): δ 155.70, 132.10, 129.40, 127.80, 121.53, 115.69, 115.30, 114.79, 112.47, 55.48, 51.04, 40.75, 22.32.

HR-MS (ESI): Calcd. 263.0903 for C<sub>13</sub>H<sub>13</sub>N<sub>4</sub>O<sup>+</sup> [M+H]<sup>+</sup>, found: 263.0897.

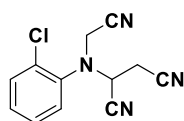

2-((2-chlorophenyl)(cyanomethyl)amino)succinonitrile (**5l**): a yellow liquid was obtained after column chromatography (SiO<sub>2</sub>, 1.5 cm × 25 cm) using *n*-Hexane/EtOAc (3/1, v/v), 91 mg, Yield: 75%.

<sup>1</sup>H NMR (400 MHz, CDCl<sub>3</sub>): δ 7.51-7.47 (m, 1 H), 7.35-7.32 (m, 1 H), 7.26-7.18 (m, 2 H), 4.64-4.61 (m, 1 H), 4.27-4.17 (m, 2 H), 3.04-2.92 (m, 2 H).

$^{13}\text{C}$  NMR (100 MHz,  $\text{CDCl}_3$ ):  $\delta$  158.26 (d,  $J = 993.1$  Hz), 131.13 (d,  $J = 43.7$  Hz), 129.62 (d,  $J = 33.5$  Hz), 126.78, 125.66 (d,  $J = 14.6$  Hz), 117.53 (d,  $J = 80.2$  Hz), 115.00, 114.79, 114.44, 51.09 (d,  $J = 7.3$  Hz), 41.15 (d,  $J = 11.6$  Hz), 22.00.

HR-MS (ESI): Calcd. 267.0408 for  $\text{C}_{12}\text{H}_9\text{ClN}_4\text{Na}^+ [\text{M}+\text{Na}]^+$ , found: 267.0400.

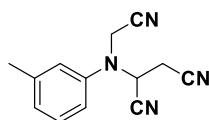

2-((cyanomethyl)(m-tolyl)amino)succinonitrile (**5m**): a yellow liquid was obtained after column chromatography ( $\text{SiO}_2$ , 1.5 cm  $\times$  25 cm) using *n*-Hexane/EtOAc (3/1, v/v), 96 mg, Yield: 86%.

$^1\text{H}$  NMR (400 MHz,  $\text{DMSO}-d_6$ ):  $\delta$  7.30-7.26 (m, 1 H), 7.03-6.97 (m, 2 H), 6.91-6.89 (m, 1 H), 5.62-5.58 (m, 1 H), 4.75-4.59 (m, 2 H), 3.54-3.43 (m, 2 H), 2.33 (s, 3 H).

$^{13}\text{C}$  NMR (100 MHz,  $\text{DMSO}-d_6$ ):  $\delta$  145.26, 139.48, 129.84, 123.68, 118.31, 116.87, 116.83, 116.27, 114.80, 48.32, 36.75, 21.74, 20.80.

HR-MS (ESI): Calcd. 247.0954 for  $\text{C}_{13}\text{H}_{12}\text{N}_4\text{Na}^+ [\text{M}+\text{Na}]^+$ , found: 247.0947.

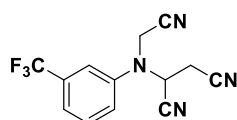

2-((cyanomethyl)(3-(trifluoromethyl)phenyl)amino)succinonitrile (**5n**): a yellow liquid was obtained after column chromatography ( $\text{SiO}_2$ , 1.5 cm  $\times$  25 cm) using *n*-Hexane/EtOAc (3/1, v/v), 115 mg, Yield: 83%.

$^1\text{H}$  NMR (400 MHz,  $\text{CDCl}_3$ ):  $\delta$  7.63-7.47 (m, 4 H), 4.80-4.70 (m, 1 H), 4.31-4.22 (m, 2 H), 3.05-2.94 (m, 2 H).

$^{13}\text{C}$  NMR (100 MHz,  $\text{CDCl}_3$ ):  $\delta$  144.35, 133.09-130.73 (m), 125.31-121.96 (m), 119.17-119.13 (m), 114.55, 114.27, 114.03, 50.47, 40.54, 21.88.

$^{19}\text{F}$  NMR (376 MHz,  $\text{CDCl}_3$ ):  $\delta$  -62.80-(-62.81) (m).

HR-MS (ESI): Calcd. 301.0672 for  $\text{C}_{13}\text{H}_9\text{F}_3\text{N}_4\text{Na}^+ [\text{M}+\text{Na}]^+$ , found: 301.0668.

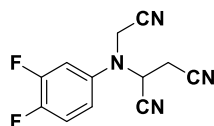

2-((cyanomethyl)(3,4-difluorophenyl)amino)succinonitrile (**5o**): a yellow liquid was obtained after column chromatography (SiO<sub>2</sub>, 1.5 cm × 25 cm) using *n*-Hexane/EtOAc (3/1, v/v), 100 mg, Yield: 81%.

<sup>1</sup>H NMR (400 MHz, CDCl<sub>3</sub>): δ 7.31-7.13 (m, 3 H), 4.64-4.60 (m, 1 H), 4.21-4.12 (m, 2 H), 2.99-2.86 (m, 2 H).

<sup>13</sup>C NMR (100 MHz, CDCl<sub>3</sub>): δ 152.10-148.20 (m), 139.89-139.78 (m), 120.66-120.56 (m), 118.97-118.78 (m), 114.65, 114.53, 114.33, 114.01 (d, *J* = 806.84 Hz), 50.94, 41.85, 21.86.

<sup>19</sup>F NMR (376 MHz, CDCl<sub>3</sub>): δ -132.19-(-132.25) (m), -136.95-(-137.01) (m).

HR-MS (ESI): Calcd. 269.0609 for C<sub>12</sub>H<sub>8</sub>F<sub>2</sub>N<sub>4</sub>Na<sup>+</sup> [M+Na]<sup>+</sup>, found: 269.0603.

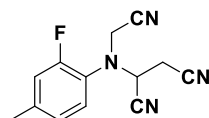

2-((cyanomethyl)(2-fluoro-4-methylphenyl)amino)succinonitrile (**5p**): a yellow liquid was obtained after column chromatography (SiO<sub>2</sub>, 1.5 cm × 25 cm) using *n*-Hexane/EtOAc (3/1, v/v), 100.5 mg, Yield: 83%.

<sup>1</sup>H NMR (400 MHz, CDCl<sub>3</sub>): δ 7.39-7.35 (m, 1 H), 7.04-7.00 (m, 2 H), 4.58-4.55 (m, 1 H), 4.23-4.12 (m, 2 H), 2.99-2.86 (m, 2 H), 2.37 (s, 3 H).

<sup>13</sup>C NMR (100 MHz, CDCl<sub>3</sub>): δ 158.31 (d, *J* = 991.64 Hz), 140.90 (d, *J* = 32.08 Hz), 127.94 (d, *J* = 45.2 Hz), 126.95 (d, *J* = 7.28 Hz), 126.21 (d, *J* = 13.12 Hz), 117.94 (d, *J* = 80.2 Hz), 114.96, 114.80, 114.38, 51.23 (d, *J* = 7.28 Hz), 41.61 (d, *J* = 10.2 Hz), 22.00, 21.10 (d, *J* = 5.84 Hz).

<sup>19</sup>F NMR (376 MHz, CDCl<sub>3</sub>): δ -119.82.

HR-MS (ESI): Calcd. 265.0860 for C<sub>13</sub>H<sub>12</sub>FN<sub>4</sub>Na<sup>+</sup> [M+Na]<sup>+</sup>, found: 265.0851.

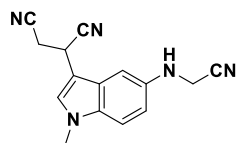

2-((3-(cyanomethyl)-1-methyl-1H-indol-5-yl)amino)succinonitrile (**5q**): a yellow liquid was obtained after column chromatography (SiO<sub>2</sub>, 1.5 cm × 25 cm) using *n*-Hexane/EtOAc (2/1, v/v), 112 mg, Yield: 85%.

<sup>1</sup>H NMR (500 MHz, DMSO-*d*<sub>6</sub>): δ 7.46-7.42 (m, 1 H), 7.33 (s, 1 H), 7.23-7.22 (m, 1 H), 7.06-7.02 (m, 1 H), 4.60-4.57 (m, 4 H), 4.00-3.95 (m, 2 H), 3.72 (s, 3 H).

<sup>13</sup>C NMR (126 MHz, DMSO-*d*<sub>6</sub>): δ 139.10, 133.14, 129.65, 127.36, 119.92, 117.50, 116.96, 113.04, 111.56, 105.44, 103.02, 41.33, 33.09, 19.88, 13.57.

HR-MS (ESI): Calcd. 264.1244 for C<sub>15</sub>H<sub>14</sub>N<sub>5</sub><sup>+</sup>[M+H]<sup>+</sup>, found: 264.1242.

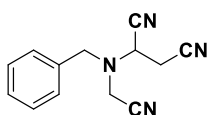

2-(benzyl(cyanomethyl)amino)succinonitrile (**5r**): a yellow liquid was obtained after column chromatography (SiO<sub>2</sub>, 1.5 cm × 25 cm) using *n*-Hexane/EtOAc (3/1, v/v), 58 mg, Yield: 52%.

<sup>1</sup>H NMR (400 MHz, CDCl<sub>3</sub>): δ 7.42-7.38 (m, 5 H), 4.18-4.06 (m, 2 H), 3.80-3.44 (m, 4 H), 2.98-2.95 (m, 2 H).

<sup>13</sup>C NMR (100 MHz, CDCl<sub>3</sub>): δ 133.89, 129.31, 129.04, 114.15, 113.89, 113.39, 55.48, 50.42, 39.88, 21.58.

HR-MS (ESI): Calcd. 247.0954 for C<sub>13</sub>H<sub>12</sub>N<sub>4</sub>Na<sup>+</sup>[M+Na]<sup>+</sup>, found: 247.0948.

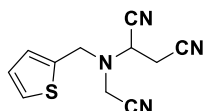

2-((cyanomethyl)(thiophen-2-ylmethyl)amino)succinonitrile (**5s**): a yellow liquid was obtained after column chromatography (SiO<sub>2</sub>, 1.5 cm × 25 cm) using *n*-Hexane/EtOAc (3/1, v/v), 64.5 mg, Yield: 56%.

<sup>1</sup>H NMR (400 MHz, CDCl<sub>3</sub>): δ 7.39-7.37 (m, 1 H), 7.14-7.12 (m, 1 H), 7.04-7.00 (m, 1H), 4.23-4.18 (m, 2 H), 4.10-4.06 (m, 1 H), 3.71-3.62 (m, 2 H), 2.97-2.95 (m, 2 H).

<sup>13</sup>C NMR (100 MHz, CDCl<sub>3</sub>): δ 136.70, 128.64, 127.58, 127.29, 114.17, 113.87, 113.34, 50.55, 49.99, 39.59, 21.65.

HR-MS (ESI): Calcd. 253.0518 for  $C_{11}H_{10}N_4NaS^+[M+Na]^+$ , found: 253.0509.

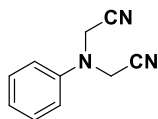

2,2'-(phenylazanediyl)diacetonitrile (**3a'**): a yellow liquid was obtained after column chromatography ( $SiO_2$ , 1.5 cm  $\times$  25 cm) using *n*-Hexane/EtOAc (5/1, v/v), 17 mg, Yield: 20%.

$^1H$  NMR (400 MHz,  $CDCl_3$ ):  $\delta$  7.42-7.36 (m, 2 H), 7.13-7.09 (m, 1 H), 7.02-6.98 (m, 2 H), 4.25 (s, 4 H).

$^{13}C$  NMR (100 MHz,  $CDCl_3$ ):  $\delta$  145.47, 130.00, 123.46, 117.23, 114.62, 41.01.

HR-MS (ESI): Calcd. 194.0689 for  $C_{10}H_9N_3Na^+[M+Na]^+$ , found: 194.0683.

## V. The Gram-Scale Synthesis of **2a**, **3a** and **5a**

### The Gram-Scale Synthesis of **2a**

A 20 mmol amount of aniline, and 140 mg (1 mol%) of (TPP)Fe(III)Cl were placed into a three-necked flask and dissolved in 80 mL of DCM at 25 °C under  $N_2$ . A solution of 2.01 g (30 mmol) of diazoacetonitrile **1a** in 20 mL of DCM was added by syringe over 10 min to the reaction mixture. After 20 min, the solvent was removed in vacuo. The residue was separated through column chromatography using EtOAc/petroleum ether as eluting, and then the desired product **2a** of 2.376 g in 90% yield was obtained upon evaporation of the solvent.

### The Gram-Scale Synthesis of **3a**

A 20 mmol amount of aniline, and 140 mg (1 mol%) of (TPP)Fe(III)Cl were placed into a three-necked flask and dissolved in 40 mL of acetonitrile at 25 °C under  $N_2$ . A solution of 2.01 g (80 mmol) of diazoacetonitrile **1a** in 10 mL of DCM was added by syringe over 10 min to the reaction mixture. After 20 min, the solvent was removed in vacuo. The residue was separated through column chromatography using EtOAc/petroleum ether as eluting, and then the desired product **3a** of 1.915 g in 56 % yield was obtained upon evaporation of the solvent.

## The Gram-Scale Synthesis of 5a

A 20 mmol amount of amines and 140 mg (1 mol% ) of (TPP)Fe(III)Cl were placed into a reaction flask and dissolved in 80 mL of DCM at 25 °C under N<sub>2</sub>. A solution of 2.01 g (30 mmol) of diazoacetonitrile in 10 mL of DCM was added by syringe over 10 min to the reaction mixture until completion of the reaction (follow by TLC). Then 360 mg (3 mol% ) of PcFe(III)Cl was added into the reaction flask, Another solution of 6.7 g (100 mmol) of diazoacetonitrile in 10 mL of DCM was added by syringe over 10 min to the reaction mixture with vigorous stirring. After about 20 min, the solvent was removed *in vacuo*. The residue was separated through column chromatography using EtOAc/petroleum ether as eluting, and then the desired product **5a** of 3.444 g in 82 % yield was obtained upon evaporation of the solvent.

## VI. Procedure for Synthetic Transformation of 3a and Characterization Data of the Product 6

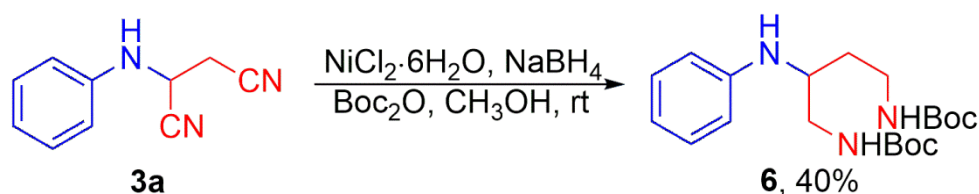

General procedure for the synthesis of 1,4-diamines:<sup>S6</sup> To a stirring solution of the hydrogenation product (0.2 mmol) in CH<sub>3</sub>OH (3 mL) Boc<sub>2</sub>O (0.8 mmol) and NiCl<sub>2</sub>·6H<sub>2</sub>O (0.8 mmol) were first added, then NaBH<sub>4</sub> (3.2mmol) was added portionwise at 0 °C over 1 h. The mixture was stirred at room temperature until no starting material was detected by TLC and carefully quenched with H<sub>2</sub>O. The aqueous layer was extracted with ethyl acetate, dried over MgSO<sub>4</sub>. After the solvent was removed *in vacuo*, the residue was purified by silica gel column chromatography (petroleum ether/EtOAc, 5/1, v/v) to afford the corresponding 1,4-diamines **6** (wax, 30 mg, 40%).

<sup>1</sup>H NMR (CDCl<sub>3</sub>, 400 MHz): δ 7.18-7.14 (m, 2 H), 6.69 (t, *J* = 7.3 Hz, 1 H), 6.63-6.60 (m, 2 H), 4.82 (m, 2 H), 3.79-3.50 (m, 2 H), 3.31-3.13 (m, 4 H), 1.80-1.58 (m, 2 H), 1.44-1.42 (m, 18 H).

<sup>13</sup>C NMR (CDCl<sub>3</sub>, 101 MHz): δ 156.50, 156.06, 147.55, 129.44, 117.57, 113.17, 79.54, 79.36, 52.10, 44.32, 37.71, 33.46, 28.42, 28.38.

HR-MS (ESI): Calcd. 402.2363 for C<sub>20</sub>H<sub>33</sub>N<sub>3</sub>NaO<sub>4</sub><sup>+</sup> [M+Na]<sup>+</sup> found:402.2364.

## VII. The Control Experiments

### The Control Experiments of 3a

#### (a) Trapping of Radicals by TEMPO

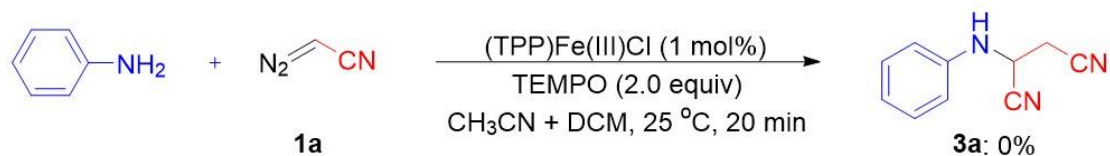

A 0.5 mmol amount of aniline, TEMPO (156.3 mg, 1 mmol, 2.0 equiv.) and 3.5 mg (1 mol%) of (TPP)Fe(III)Cl were placed into a reaction flask and dissolved in 2 mL of acetonitrile at 25 °C under N<sub>2</sub>. A solution of 67 mg (1 mmol) of diazoacetonitrile **1a** in 0.5 mL of DCM was added by syringe in one aliquot to the reaction mixture with vigorous stirring. After 20 min, The reaction solution was analyzed by GC-MS, but the product **3a** was not detected.

#### (b) Exclusion of Possible Intermediates

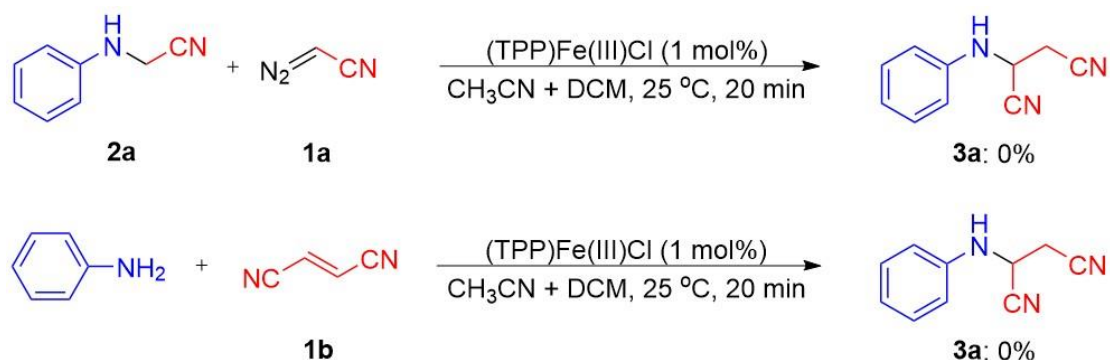

**Reaction 1:** A 0.5 mmol amount of **2a** and 3.5 mg (1 mol%) of (TPP)Fe(III)Cl were placed into a reaction flask and dissolved in 2 mL of acetonitrile at 25 °C under N<sub>2</sub>. A solution of 67 mg (1 mmol) of diazoacetonitrile **1a** in 0.5 mL of DCM was added by syringe in one aliquot to the reaction mixture with vigorous stirring. After 20 min, The reaction solution was analyzed by GC-MS, but the product **3a** was not detected.

**Reaction 2:** A 0.5 mmol amount of aniline and 3.5 mg (1 mol%) of (TPP)Fe(III)Cl were placed into a reaction flask and dissolved in 2 mL of acetonitrile at 25 °C under N<sub>2</sub>. A solution of fumaronitrile (1 mmol, 78 mg, 2.0 equiv.) in 0.5 mL of DCM was added by syringe in one aliquot



to the reaction mixture with vigorous stirring. After 20 min, The reaction solution was analyzed by GC-MS, but the product **3a** was not detected.

### The Control Experiments of **5a**

#### (a) Trapping of Radicals by TEMPO

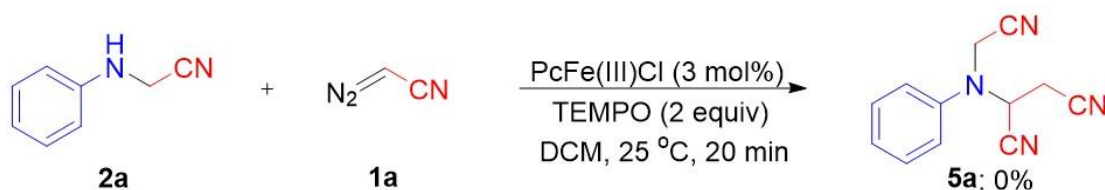

A 0.5 mmol amount of **2a**, TEMPO (156.3 mg, 1 mmol, 2.0 equiv.) and 9 mg (3 mol%) of  $\text{PcFe(III)Cl}$  were placed into a reaction flask and dissolved in 4 mL of DCM at 25 °C under  $\text{N}_2$ . A solution of 167.5 mg (2.5 mmol) of diazoacetonitrile **1a** in 1 mL of DCM was added by syringe in one aliquot to the reaction mixture with vigorous stirring. After 20 min, The reaction solution was analyzed by GC-MS, but the product **5a** was not detected.

#### (b) Exclusion of Possible Intermediates

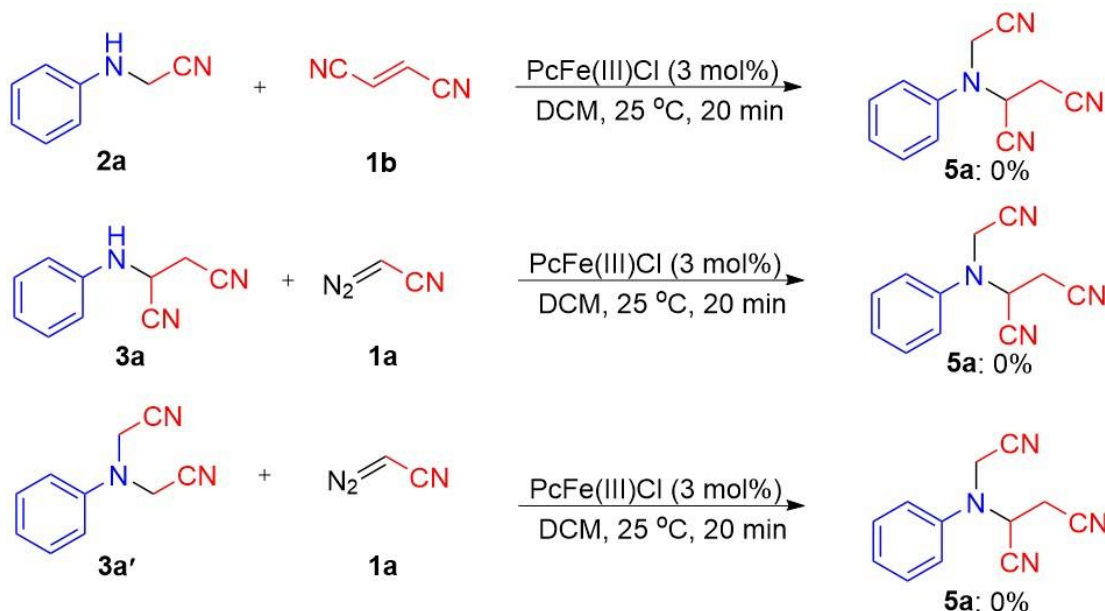

**Reaction 1:** A 0.5 mmol amount of **2a** and 9.0 mg (3 mol%) of  $\text{PcFe(III)Cl}$  were placed into a reaction flask and dissolved in 4 mL of DCM at 25 °C under  $\text{N}_2$ . A solution of (2.5 mmol) of fumaronitrile **1b** in 1 mL of DCM was added by syringe in one aliquot to the reaction mixture

with vigorous stirring. After 20 min, The reaction solution was analyzed by GC-MS, but the product **5a** was not detected.

**Reaction 2:** A 0.5 mmol amount of **3a** and 9.0 mg (3 mol%) of PcFe(III)Cl were placed into a reaction flask and dissolved in 4 mL of DCM at 25 °C under N<sub>2</sub>. A solution of 167.5 mg (2.5 mmol) of diazoacetoneitrile **1a** in 1 mL of DCM was added by syringe in one aliquot to the reaction mixture with vigorous stirring. After 20 min, The reaction solution was analyzed by GC-MS, but the product **5a** was not detected.

**Reaction 3:** A 0.5 mmol amount of **3a'** and 9.0 mg (3 mol%) of PcFe(III)Cl were placed into a reaction flask and dissolved in 4 mL of DCM at 25 °C under N<sub>2</sub>. A solution of 167.5 mg (2.5 mmol) of diazoacetoneitrile **1a** in 1 mL of DCM was added by syringe in one aliquot to the reaction mixture with vigorous stirring. After 20 min, The reaction solution was analyzed by GC-MS, but the product **5a** was not detected.

## VIII. Solvent Effect on the Mono- and Dicyanomethylation Reaction

**Table S1 Solvent effect to the mono- and dicyanomethylation reaction**

Reaction scheme:  $\text{N}_2\text{C}(\text{CN})=\text{CH}_2$  (**1a**, 1.5 eq.) +  $\text{C}_6\text{H}_5\text{NH}_2$  (1 eq.)  $\xrightarrow[\text{DCM} + \text{CH}_3\text{CN}, 25^\circ\text{C}, \text{N}_2, 20 \text{ min}]{(\text{TPP})\text{Fe}(\text{III})\text{Cl} (1 \text{ mol}\%)}$   $\text{C}_6\text{H}_5\text{NHCH}_2\text{CN}$  (**2a**) +  $\text{C}_6\text{H}_5\text{NHCH}(\text{CN})\text{CH}_2\text{CN}$  (**3a**)

| Entry | Solvent                      | Volume ratio of acetonitrile in solvent | Yield of <b>2a</b> (%) | Yield of <b>3a</b> (%) |
|-------|------------------------------|-----------------------------------------|------------------------|------------------------|
| 1     | DCM (4 mL) + MeCN (1 mL)     | 0.2                                     | 74                     | 12                     |
| 2     | DCM (3 mL) + MeCN (2 mL)     | 0.4                                     | 50                     | 43                     |
| 3     | DCM (2.5 mL) + MeCN (2.5 mL) | 0.5                                     | 21                     | 56                     |
| 4     | DCM (2 mL) + MeCN (3 mL)     | 0.6                                     | 7                      | 63                     |
| 5     | DCM (1.5 mL) + MeCN (3.5 mL) | 0.7                                     | 28                     | 7                      |
| 6     | DCM (1 mL) + MeCN (4 mL)     | 0.8                                     | 42                     | 33                     |

## IX. References

- S1.** Z. Chen, Y. Zhang, J. Nie and J.-A. Ma, Transition-Metal-Free [3+2] Cycloaddition of Nitroolefins and Diazoacetonitrile: A Facile Access to Multisubstituted Cyanopyrazoles. *Org. Lett.*, 2018, **20**, 2120–2124.
- S2.** H. Wang, Y. Shao, H. Zheng, H. Wang, J. Cheng and X. Wan, Cyanoacetic Acid as a Masked Electrophile: Transition-Metal-Free Cyanomethylation of Amines and Carboxylic Acids. *Chem. –Eur. J.*, 2015, **21**, 18333–18337.
- S3.** Y. Liu, J. Zhang, J. Zhang, H. Pei, X. Liu, J. Jin, D. H. Ryu and L. Zhang, Strecker Reactions of Formaldehyde with TMSCN, Catalyzed by TBAF and Formic Acid: N-Monocyanomethylation of Primary Amines. *Adv. Synth. Catal.*, 2023, **365**, 2–7.
- S4.** F. Yan, Z. Huang, C.-X. Du, J.-F. Bai and Y. Li, Iron-Catalyzed Reductive Strecker Reaction, *J. Catal.*, 2021, **395**, 188–194.
- S5.** G. S. Kumar, P. S. Shinde, H. Chen, K. Muralirajan, R. Kancherla and M. Rueping, Paired Electrolysis for Decarboxylative Cyanation: 4-CN-Pyridine, a Versatile Nitrile Source. *Org. Lett.*, 2022, **24**, 6357–6363.
- S6.** M. Li, D. Kong, G. Zi and G. Hou. Rh-Catalyzed Asymmetric Hydrogenation of 1,2-Dicyanoalkenes. *J. Org. Chem.*, 2017, **82**, 680–687.

## X. NMR Spectra

$^1\text{H}$  NMR of the diazoacetonitrile **1a**

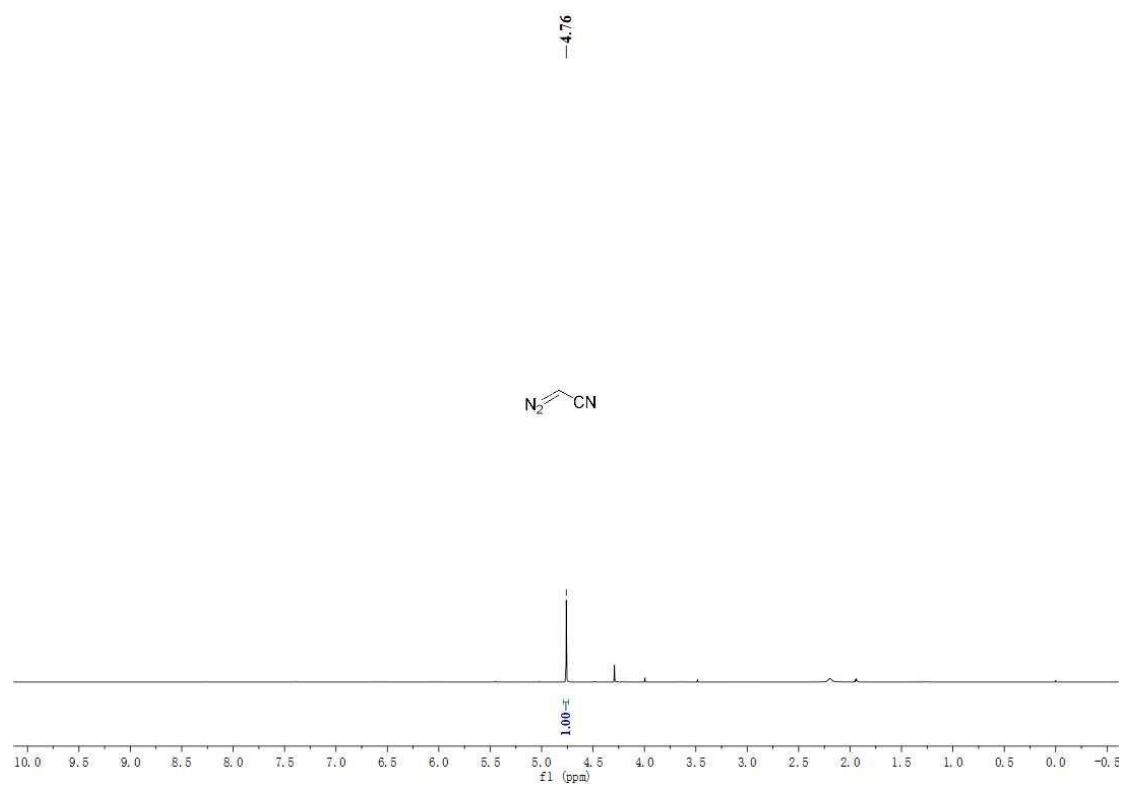

$^1\text{H}$  NMR (400 MHz,  $\text{CDCl}_3$ ) and  $^{13}\text{C}$  NMR (100 MHz,  $\text{CDCl}_3$ ) spectra for **2a**

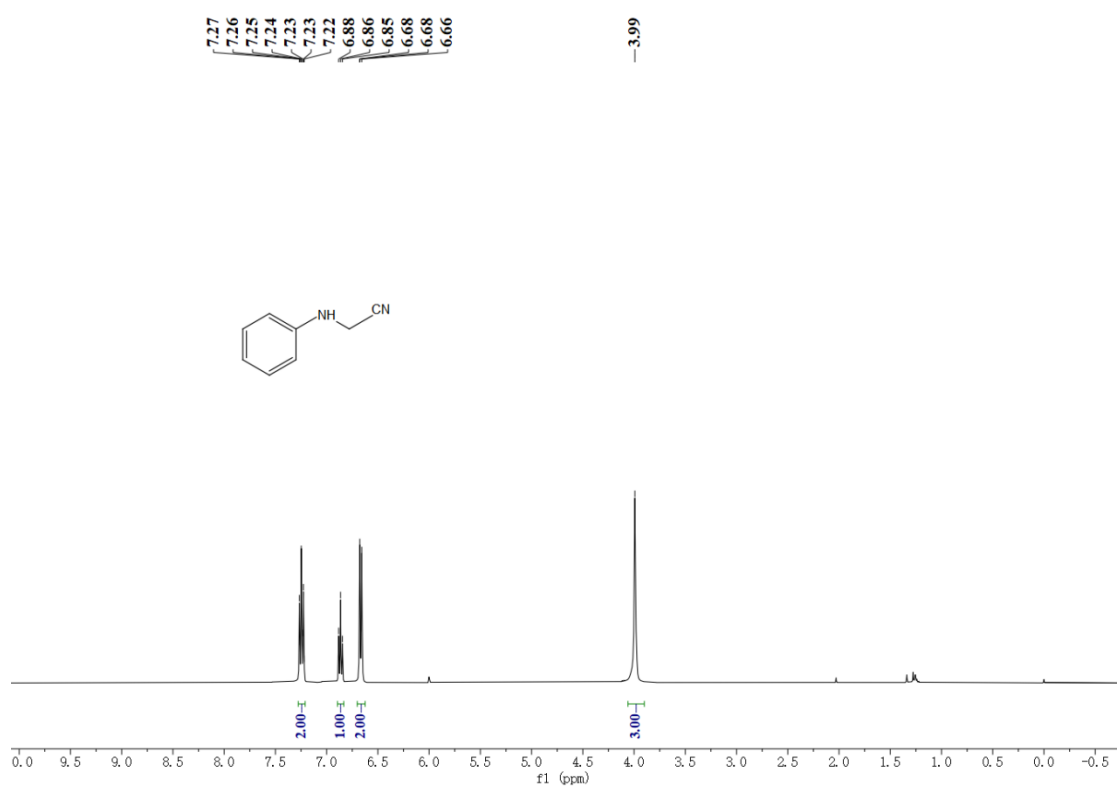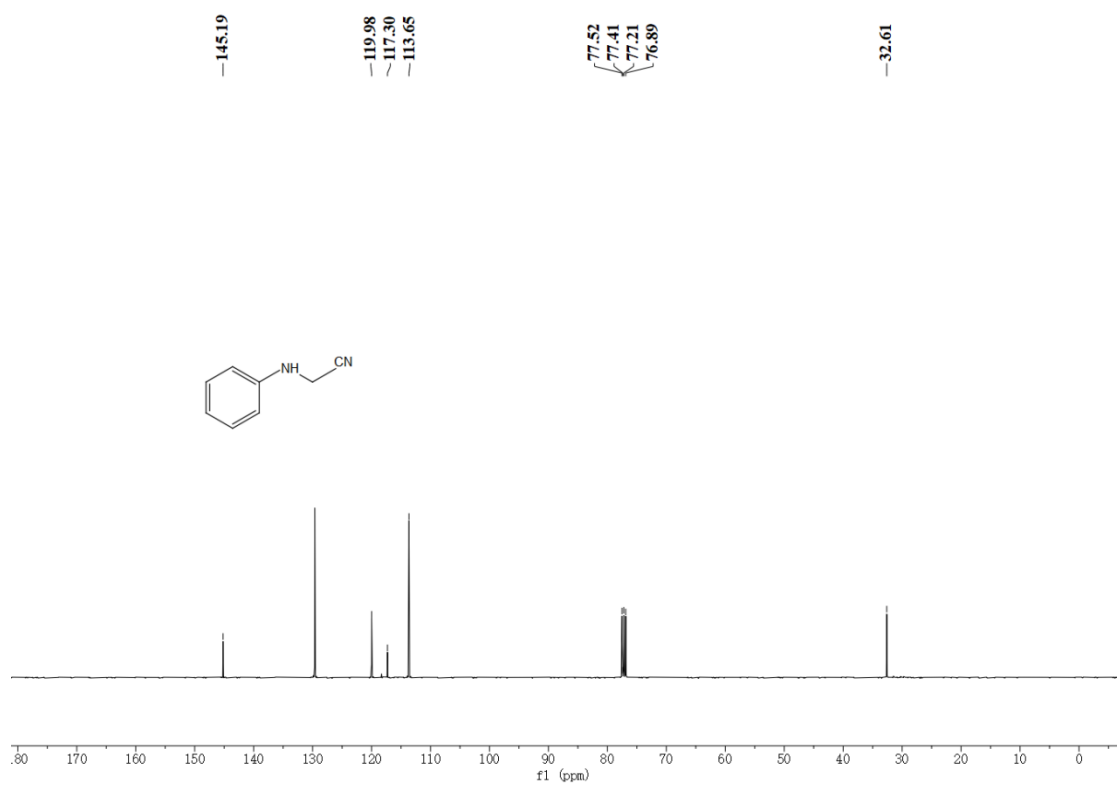

$^1\text{H}$  NMR (400 MHz,  $\text{CDCl}_3$ ) and  $^{13}\text{C}$  NMR (100 MHz,  $\text{CDCl}_3$ ) spectra for **2b**

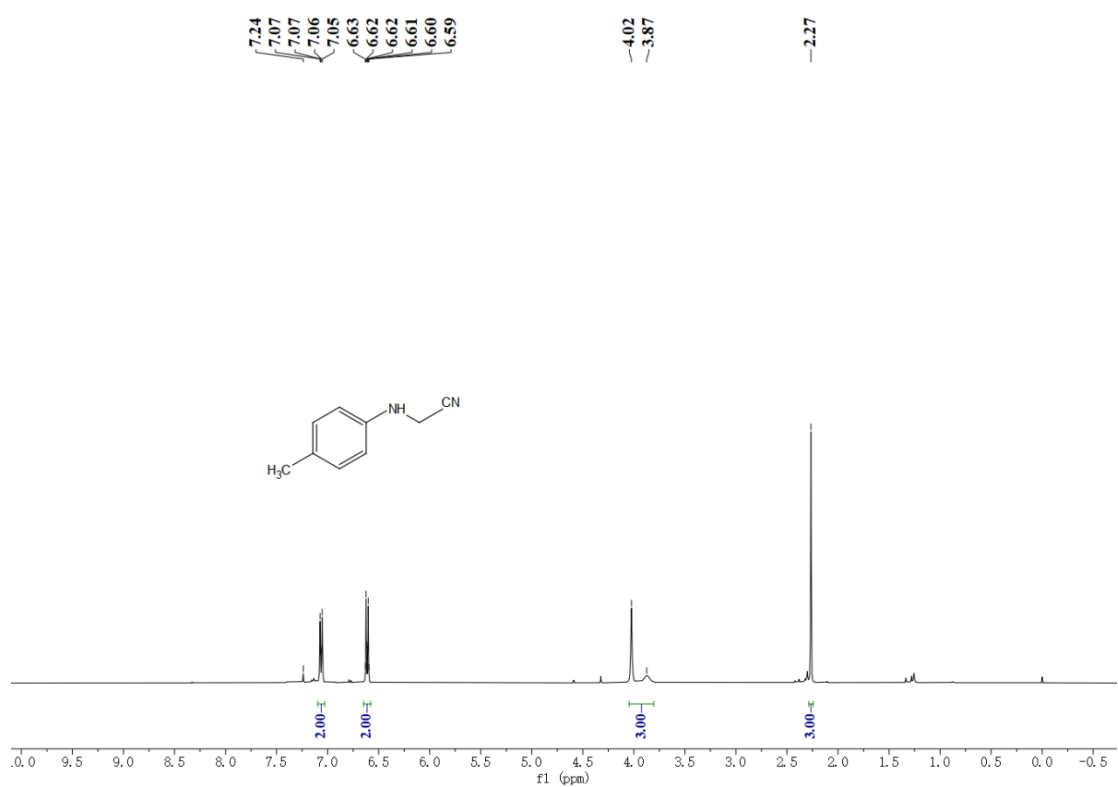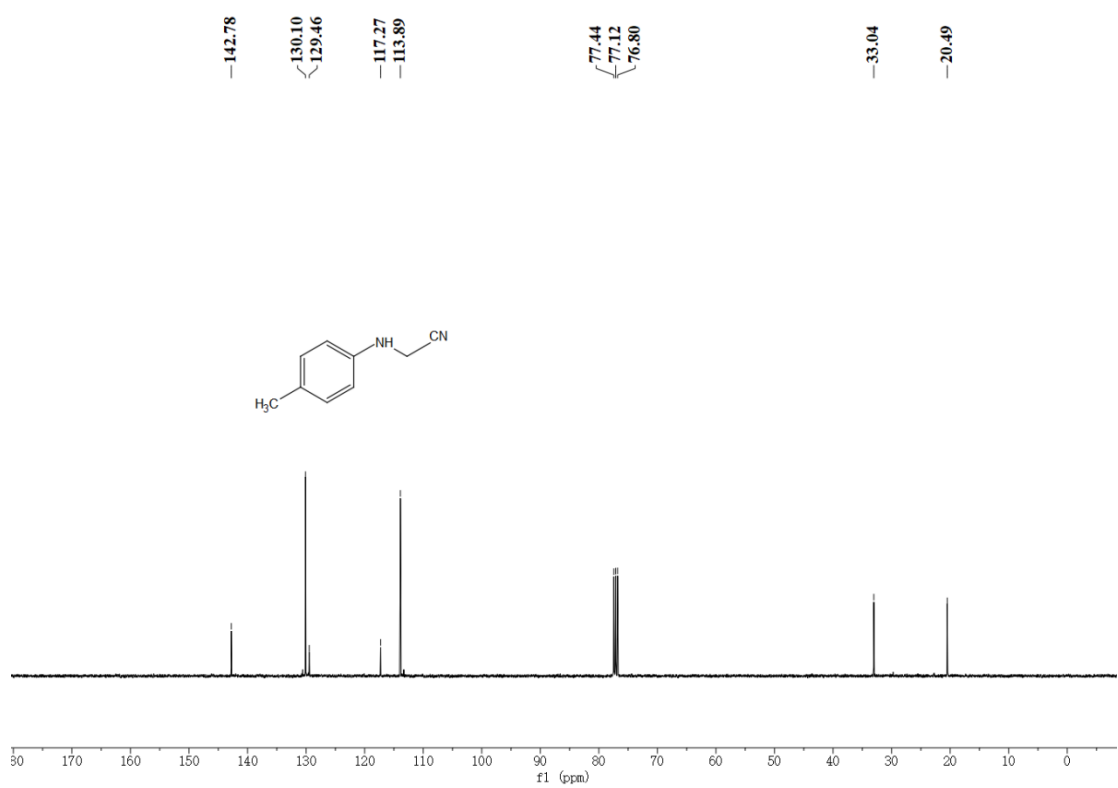

$^1\text{H}$  NMR (400 MHz,  $\text{CDCl}_3$ ) and  $^{13}\text{C}$  NMR (100 MHz,  $\text{CDCl}_3$ ) spectra for **2c**

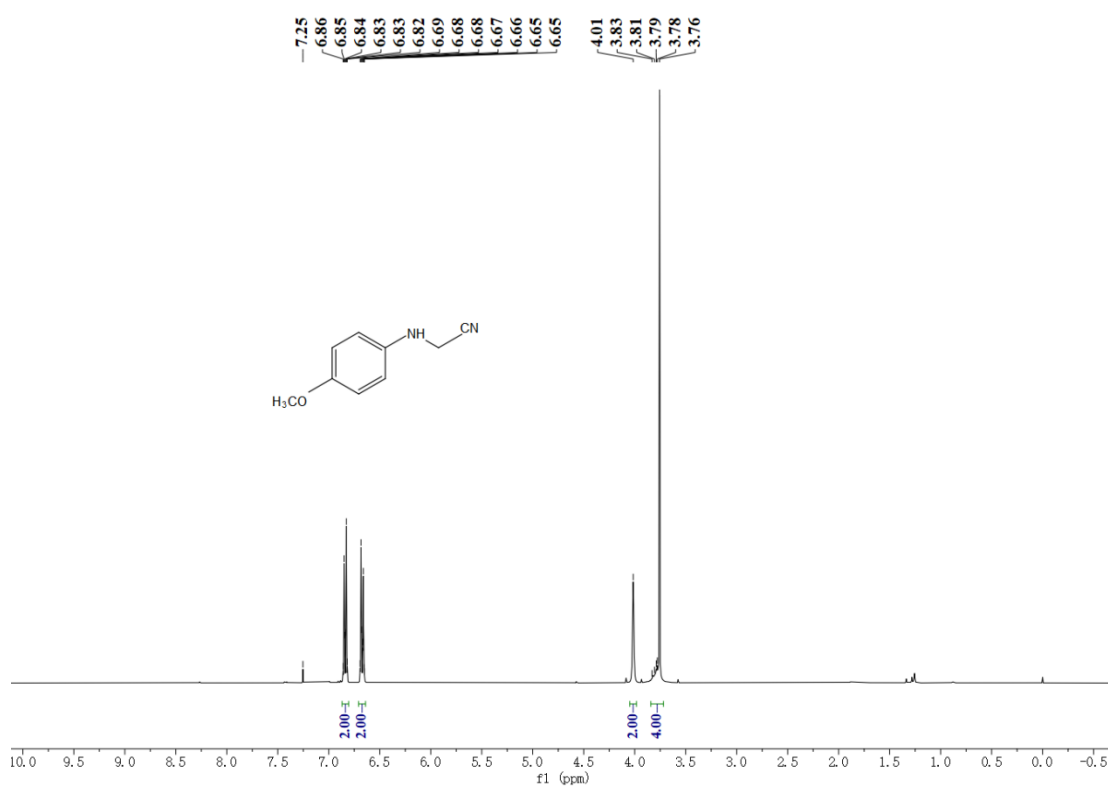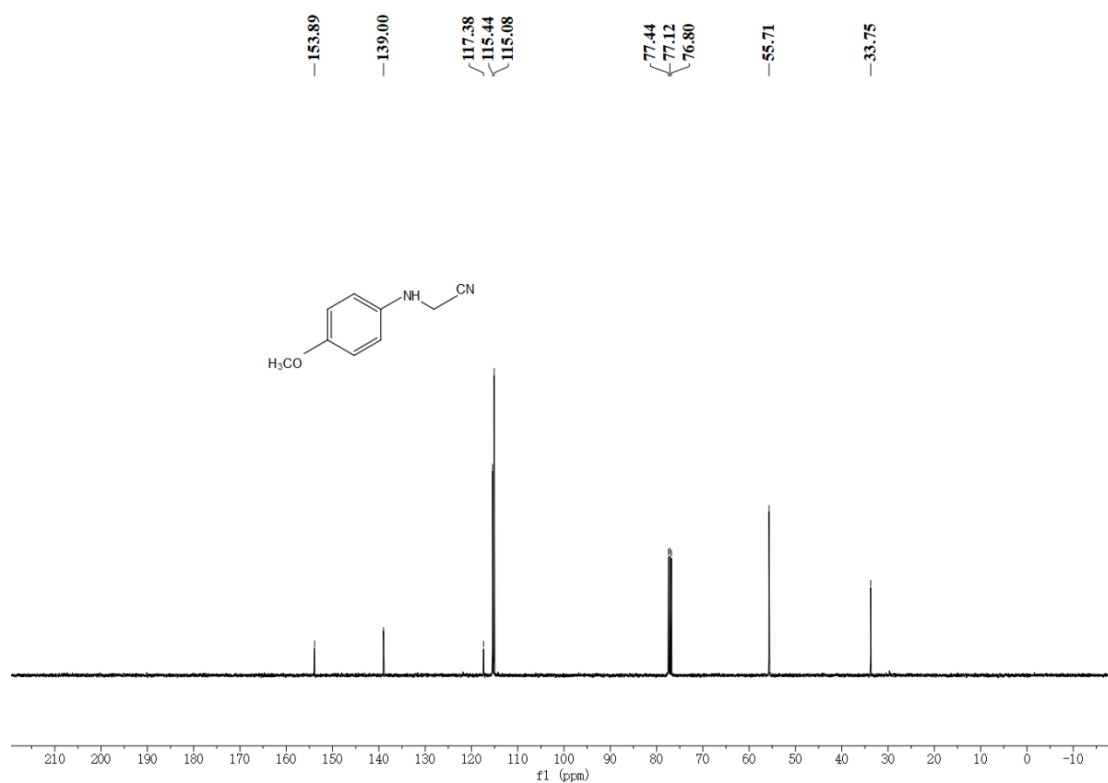

$^1\text{H}$  NMR (400 MHz,  $\text{CDCl}_3$ ) and  $^{13}\text{C}$  NMR (100 MHz,  $\text{CDCl}_3$ ) spectra for **2d**

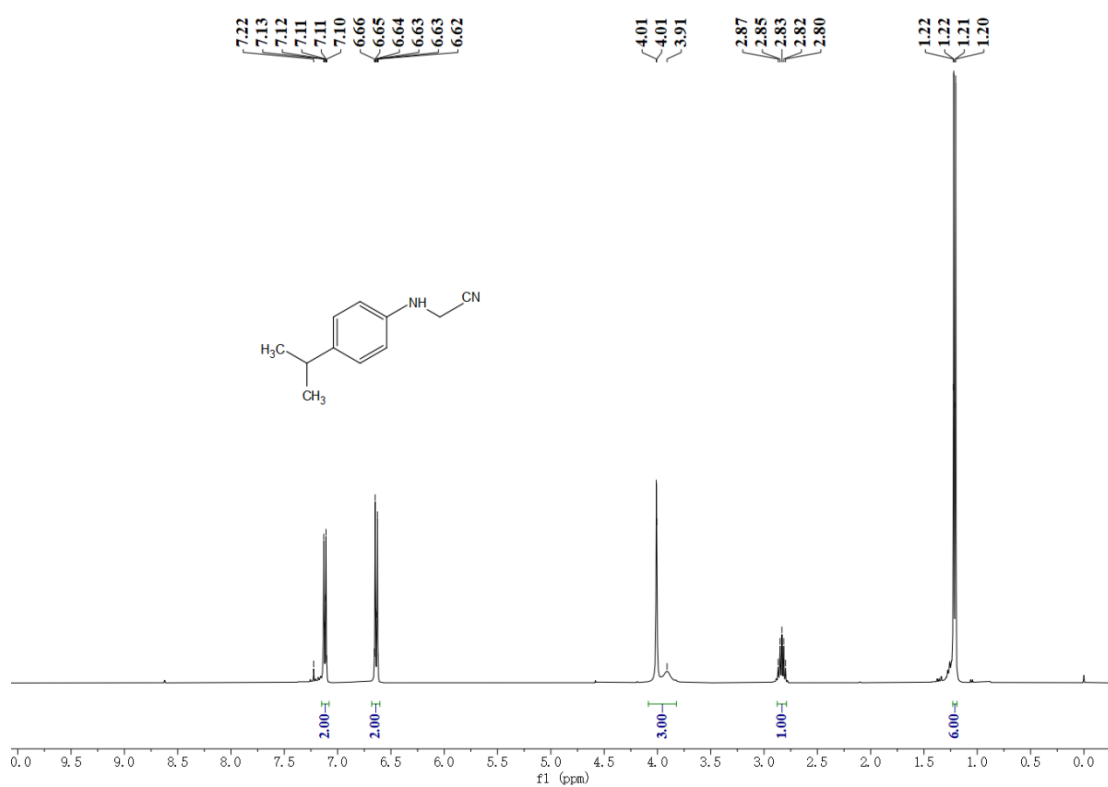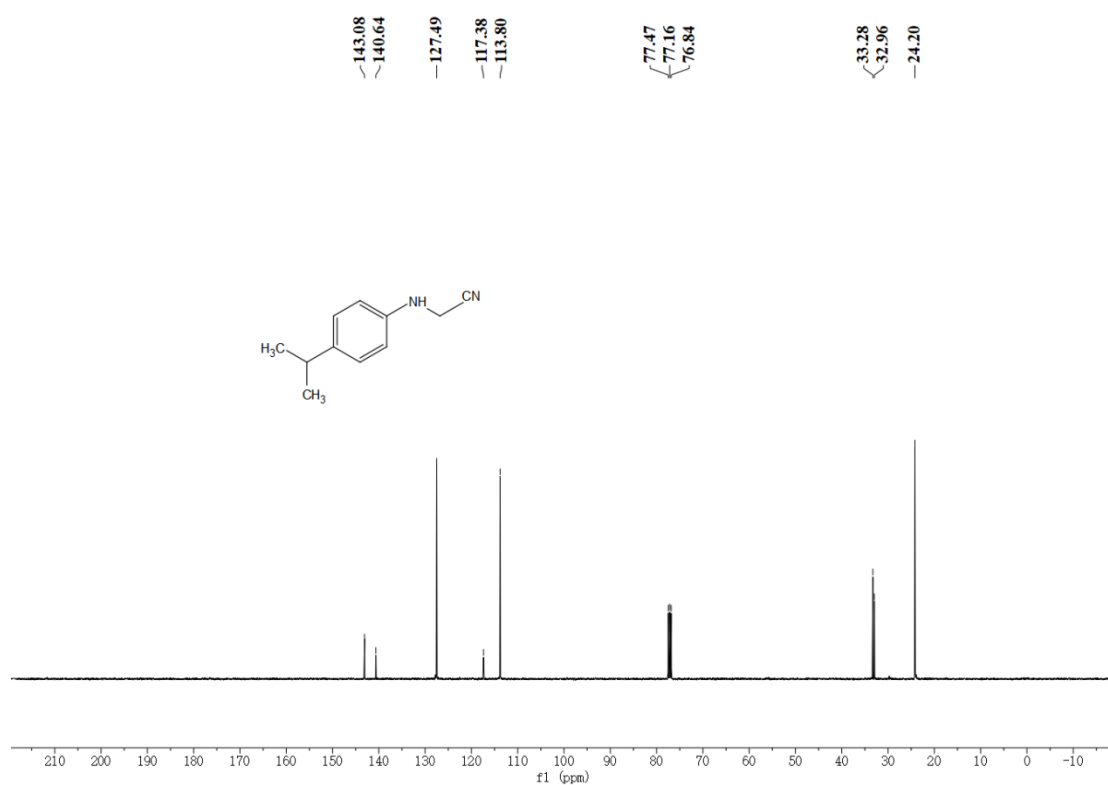



$^1\text{H}$  NMR (400 MHz,  $\text{CDCl}_3$ ),  $^{13}\text{C}$  NMR (100 MHz,  $\text{CDCl}_3$ ) and  $^{19}\text{F}$  NMR (376 MHz,  $\text{CDCl}_3$ ) spectra for **2e**

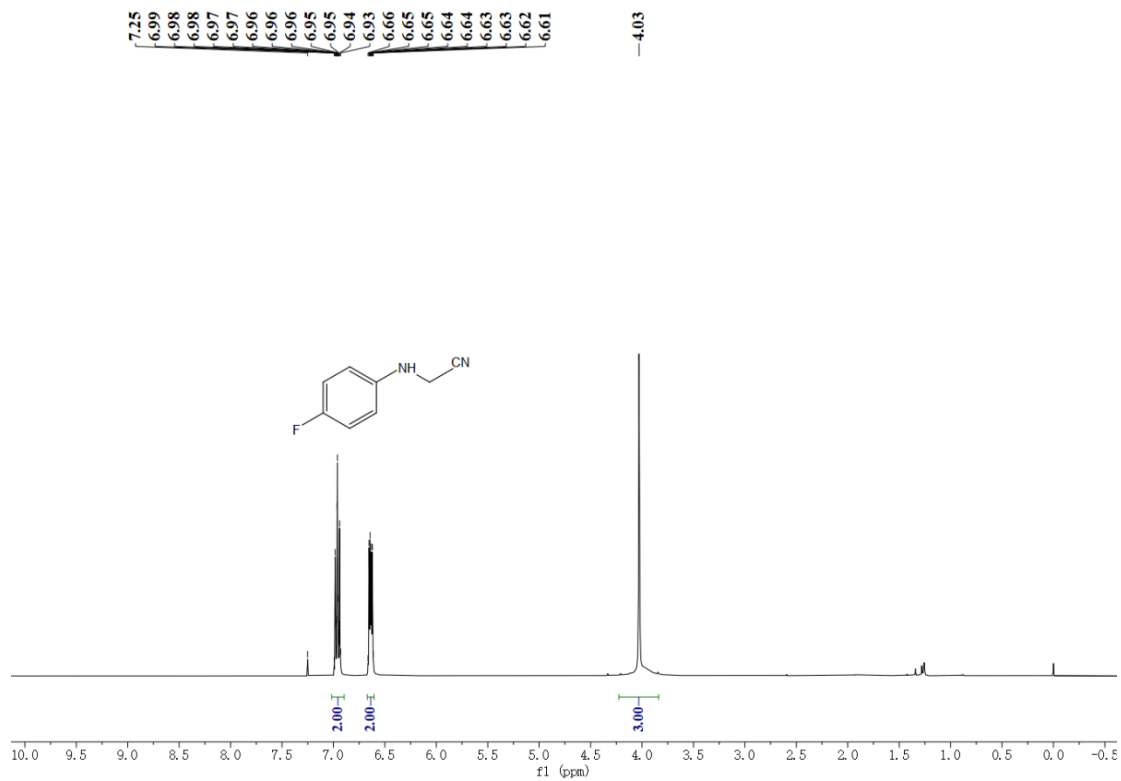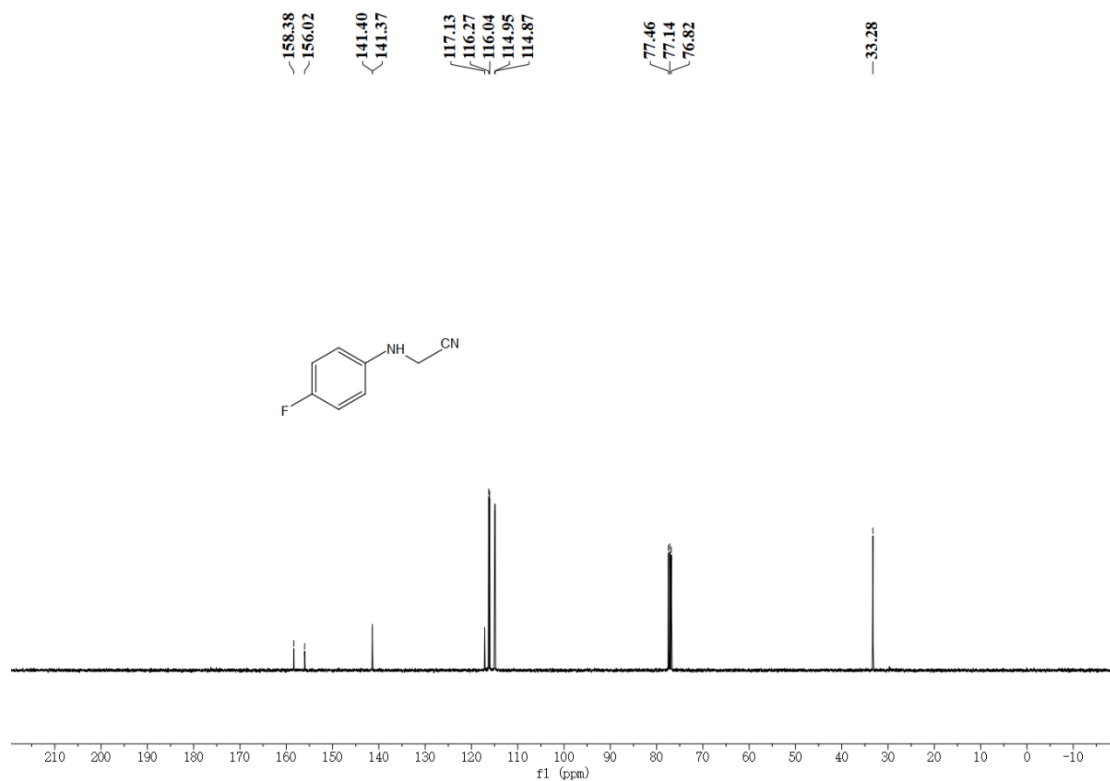

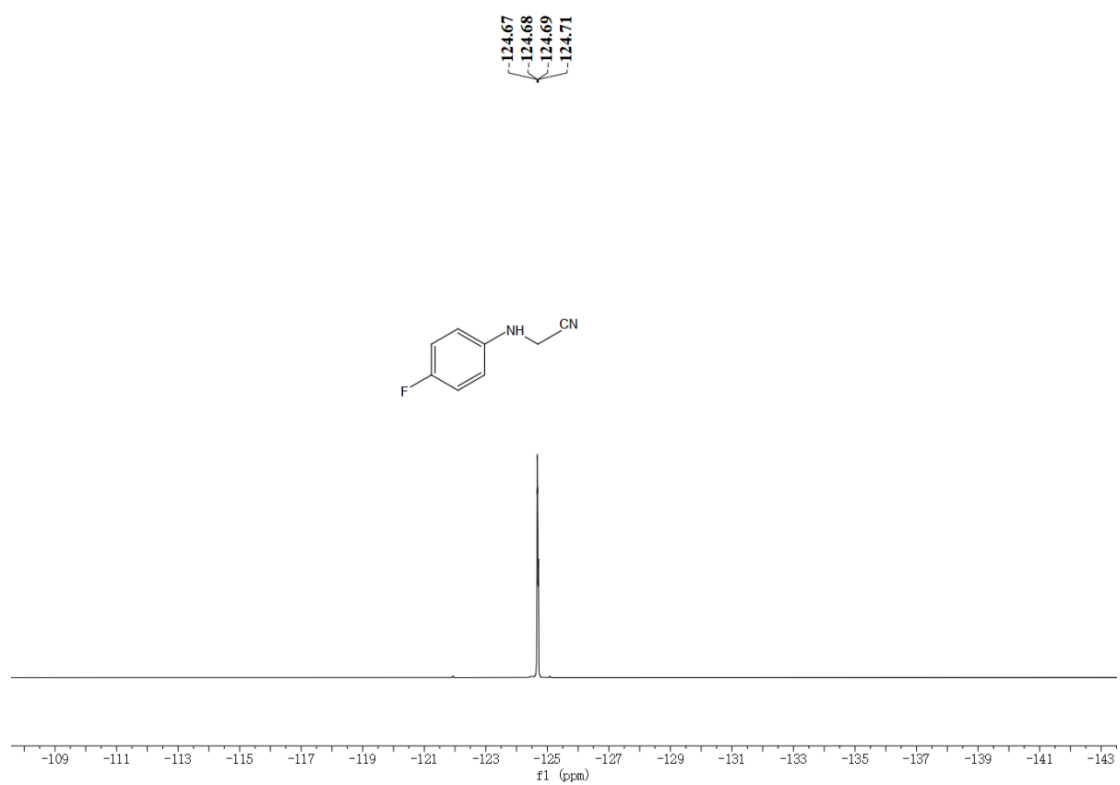

$^1\text{H}$  NMR (400 MHz,  $\text{CDCl}_3$ ) and  $^{13}\text{C}$  NMR (100 MHz,  $\text{CDCl}_3$ ) spectra for **2f**

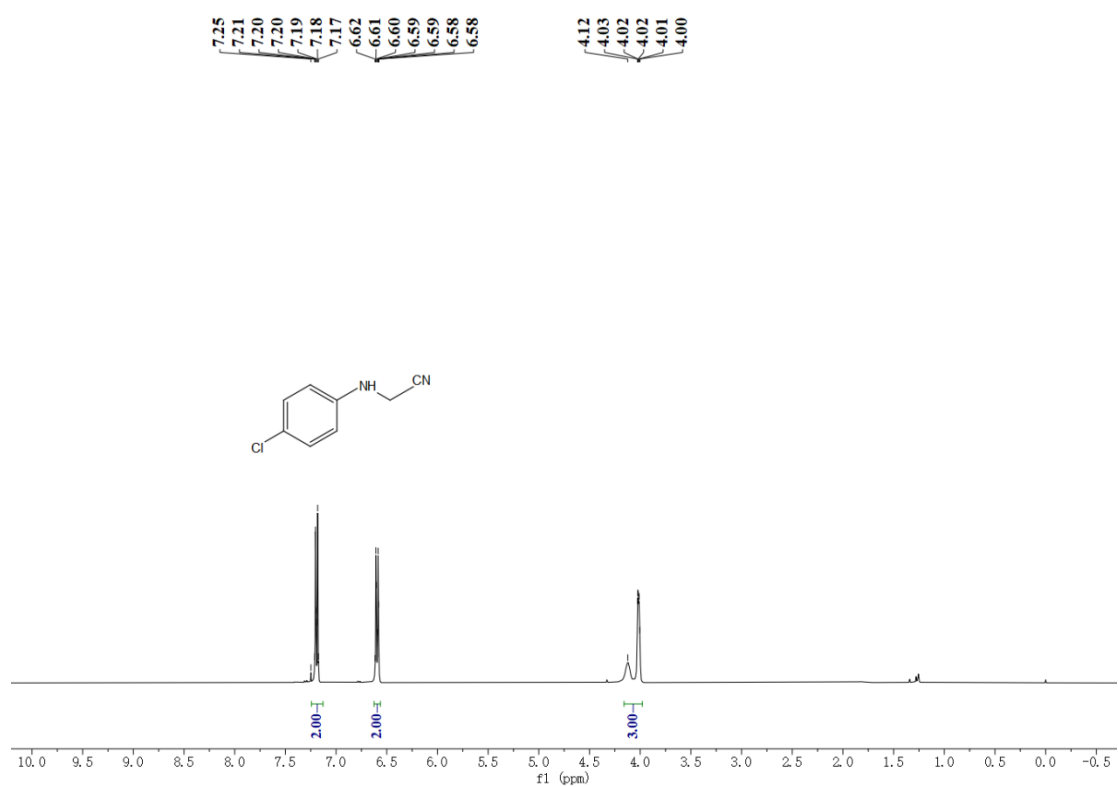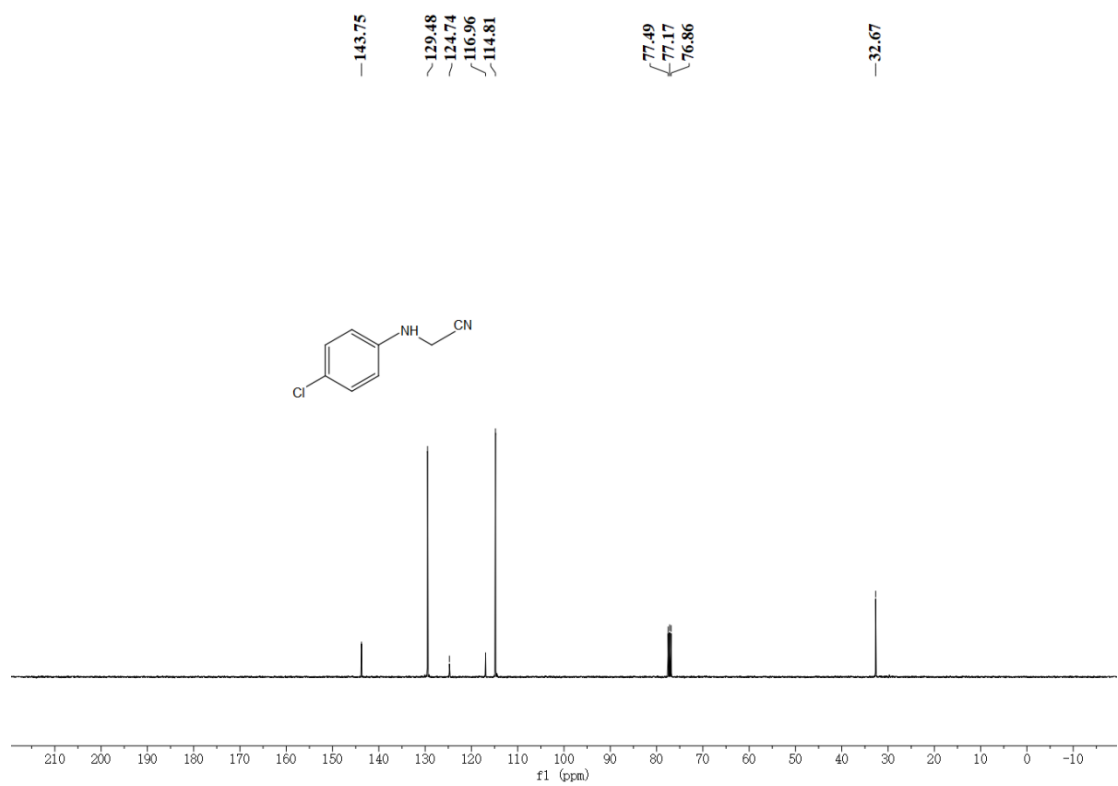

$^1\text{H}$  NMR (400 MHz,  $\text{CDCl}_3$ ) and  $^{13}\text{C}$  NMR (100 MHz,  $\text{CDCl}_3$ ) spectra for **2g**

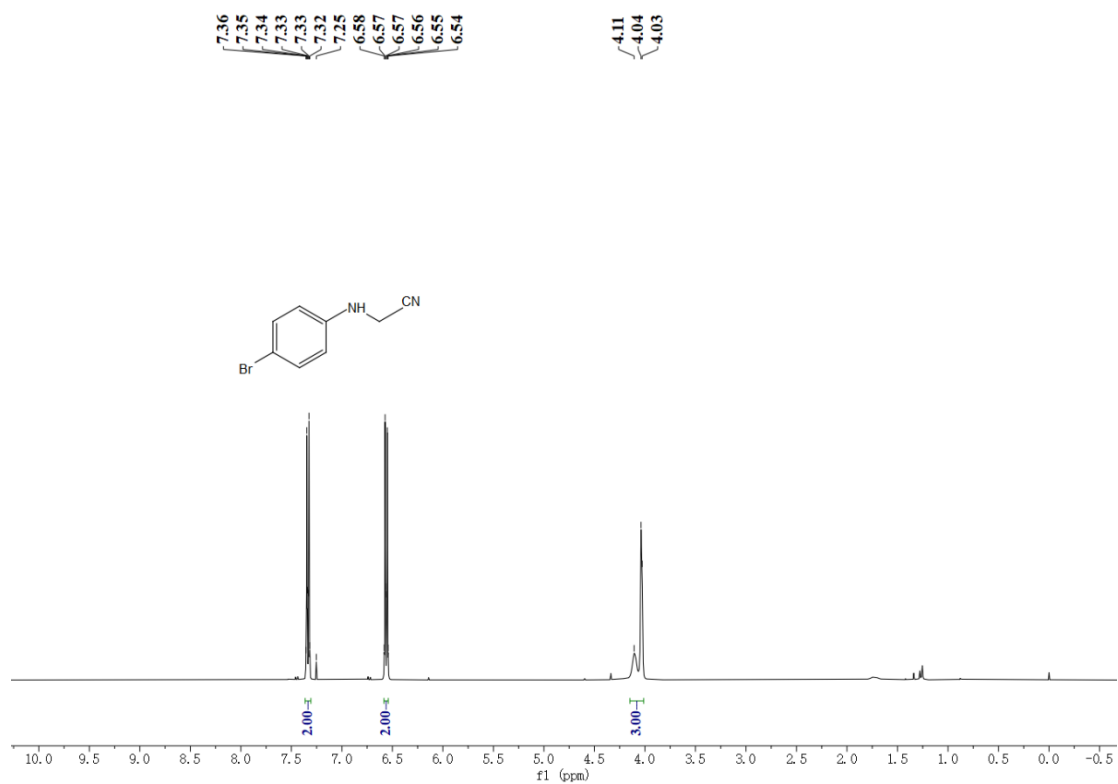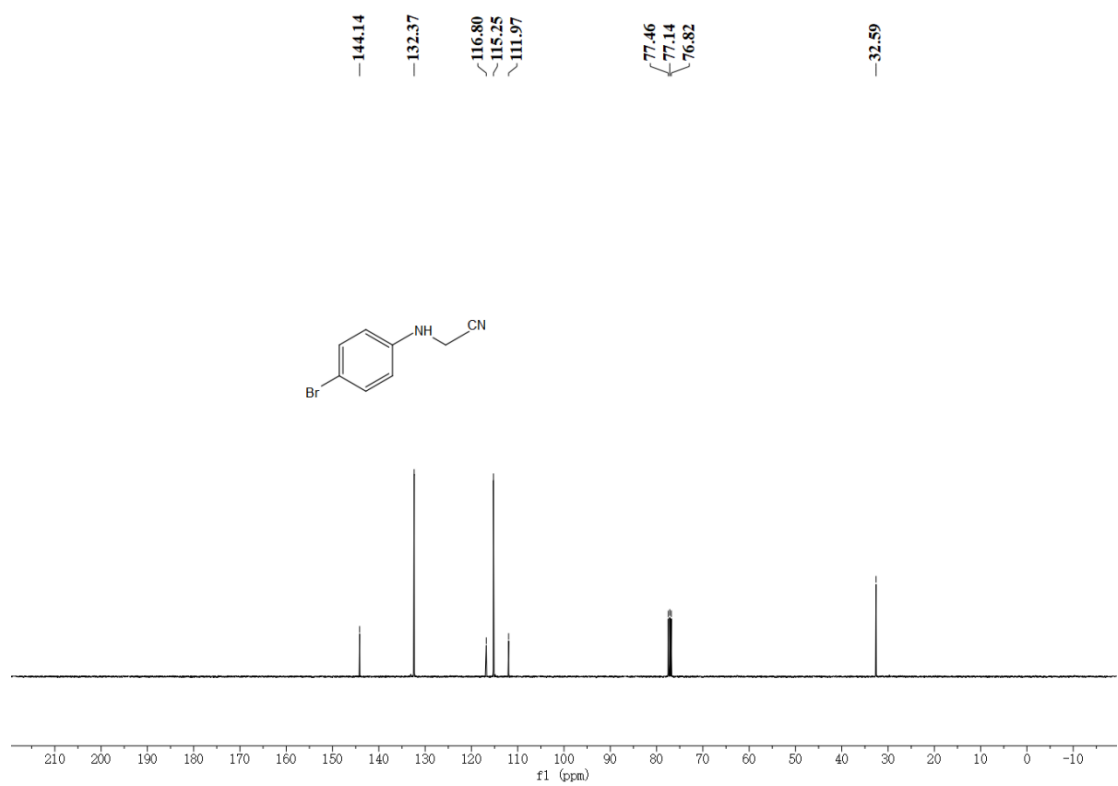

$^1\text{H}$  NMR (400 MHz,  $\text{CDCl}_3$ ) and  $^{13}\text{C}$  NMR (100 MHz,  $\text{CDCl}_3$ ) spectra for **2h**

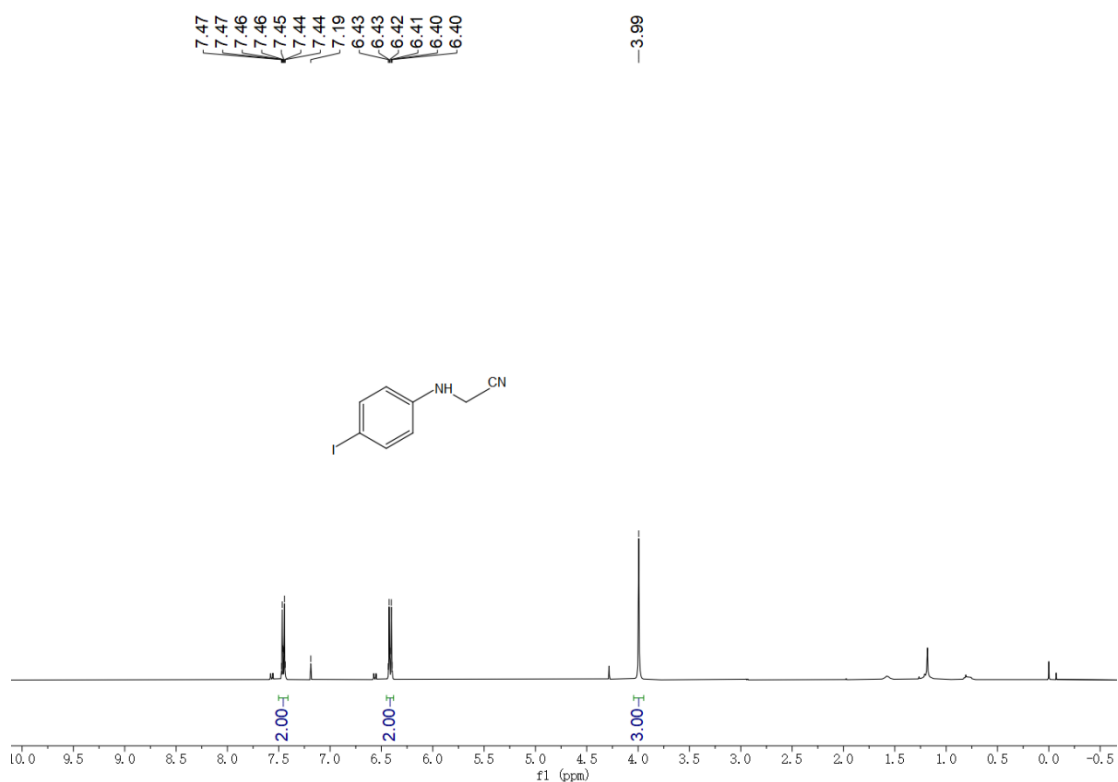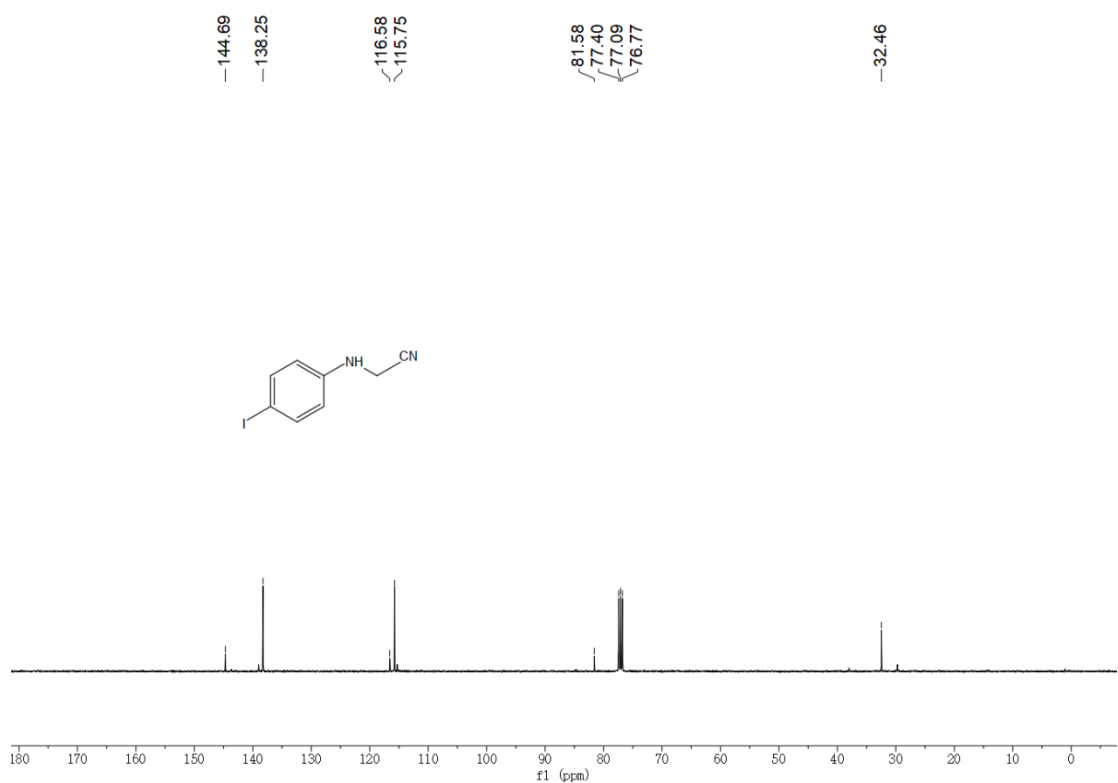

$^1\text{H}$  NMR (400 MHz,  $\text{CDCl}_3$ ) and  $^{13}\text{C}$  NMR (100 MHz,  $\text{CDCl}_3$ ) spectra for **2j**

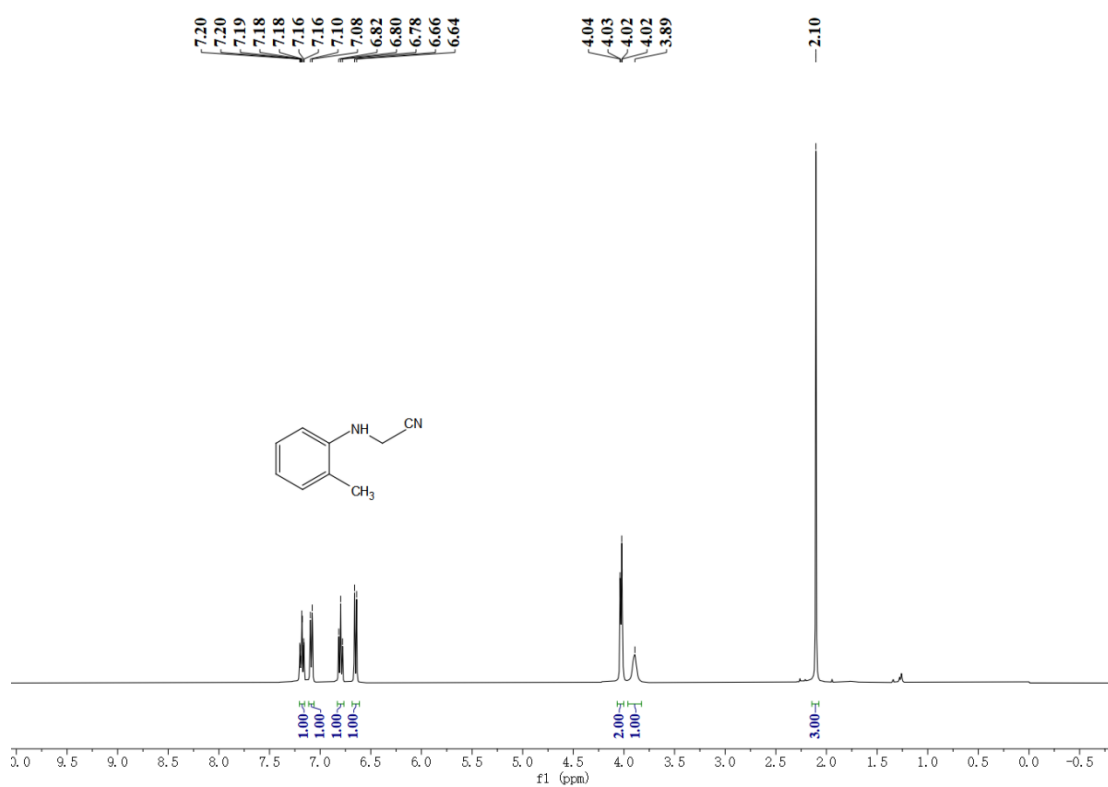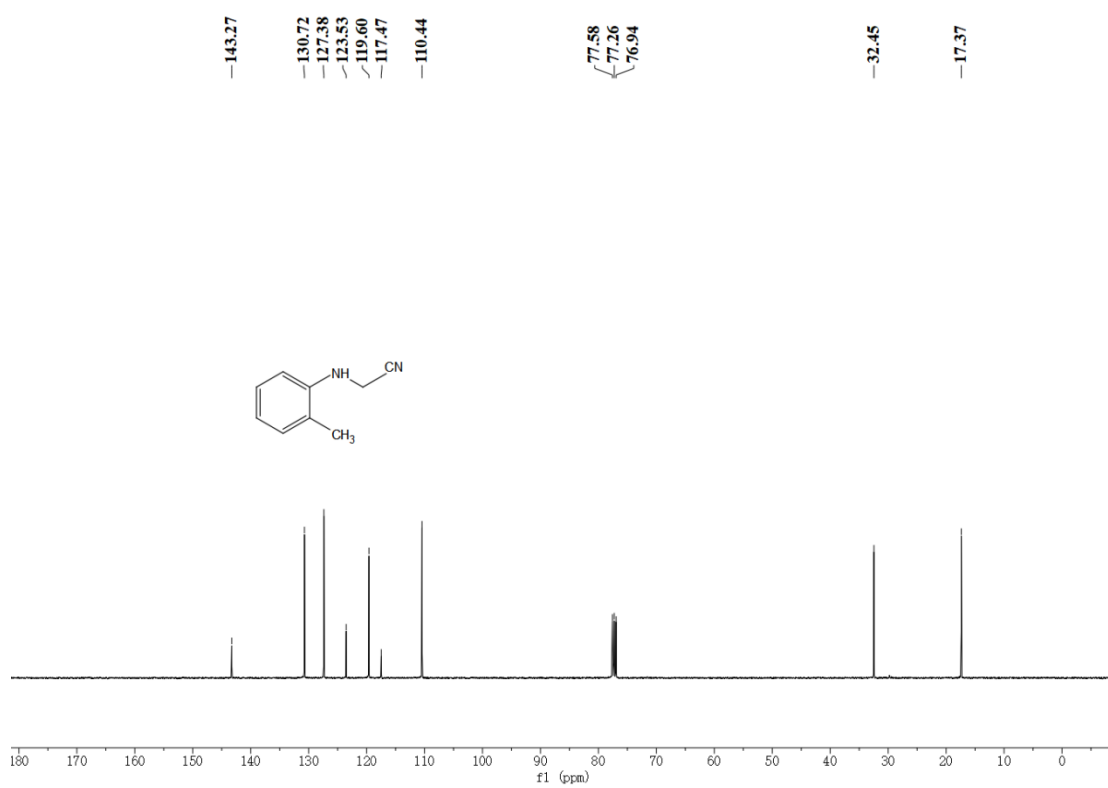

$^1\text{H}$  NMR (400 MHz,  $\text{CDCl}_3$ ) and  $^{13}\text{C}$  NMR (100 MHz,  $\text{CDCl}_3$ ) spectra for **2k**

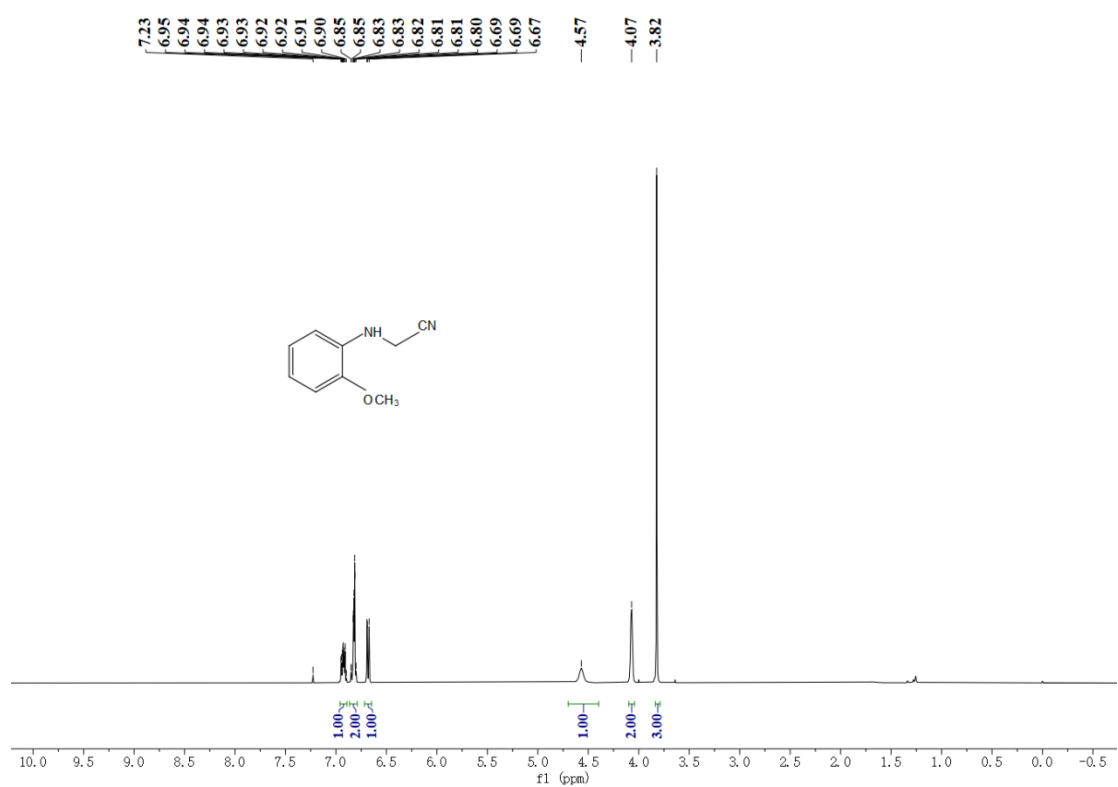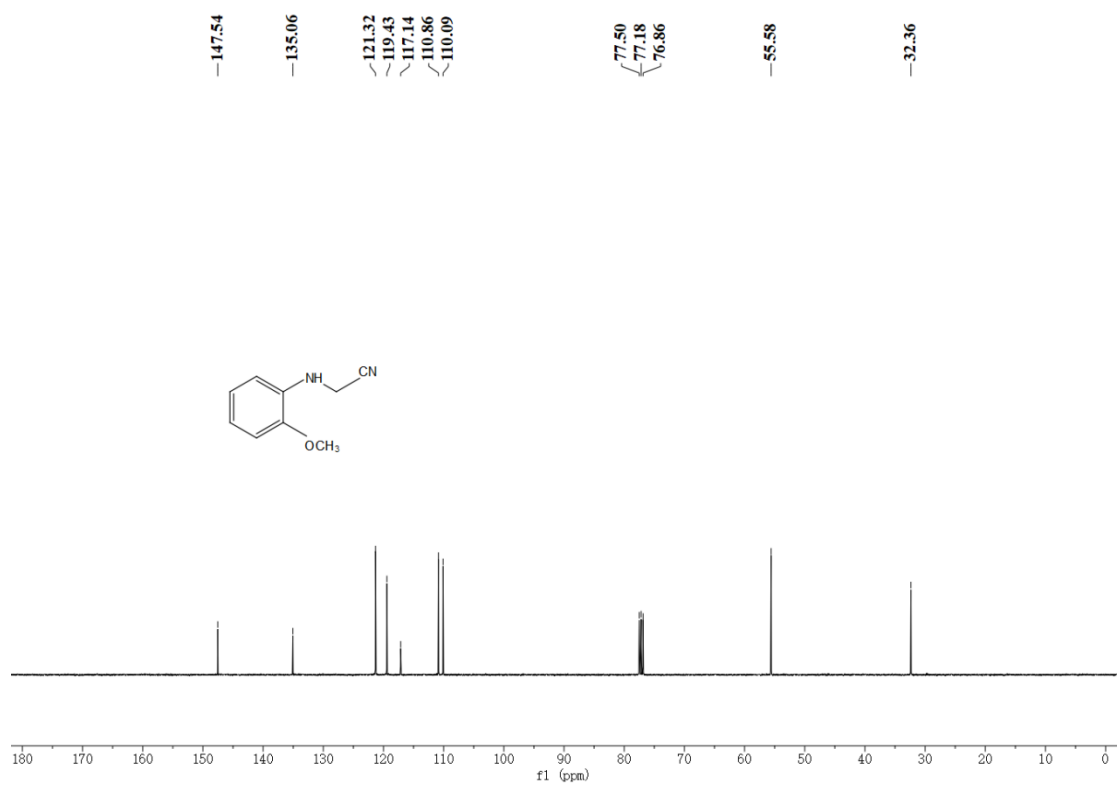

$^1\text{H}$  NMR (400 MHz,  $\text{CDCl}_3$ ) and  $^{13}\text{C}$  NMR (100 MHz,  $\text{CDCl}_3$ ) spectra for **21**

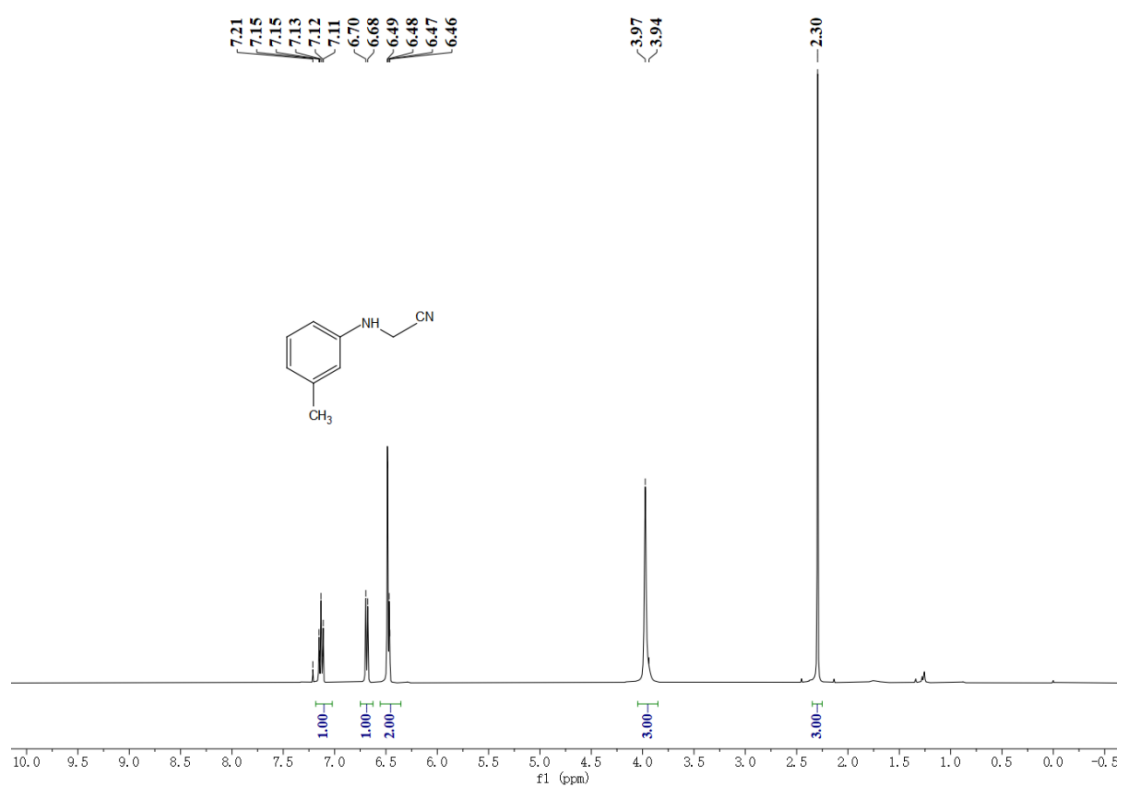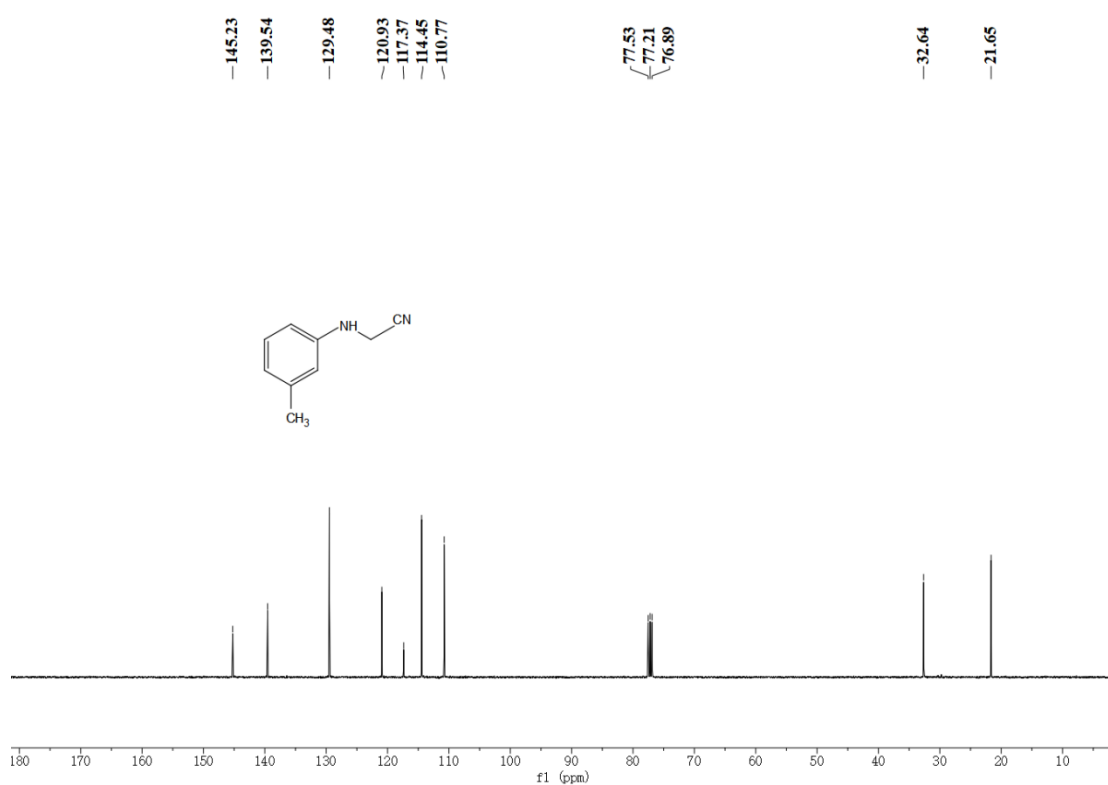



$^1\text{H}$  NMR (400 MHz,  $\text{CDCl}_3$ ),  $^{13}\text{C}$  NMR (100 MHz,  $\text{CDCl}_3$ ) and  $^{19}\text{F}$  NMR (376 MHz,  $\text{CDCl}_3$ ) spectra for **2m**

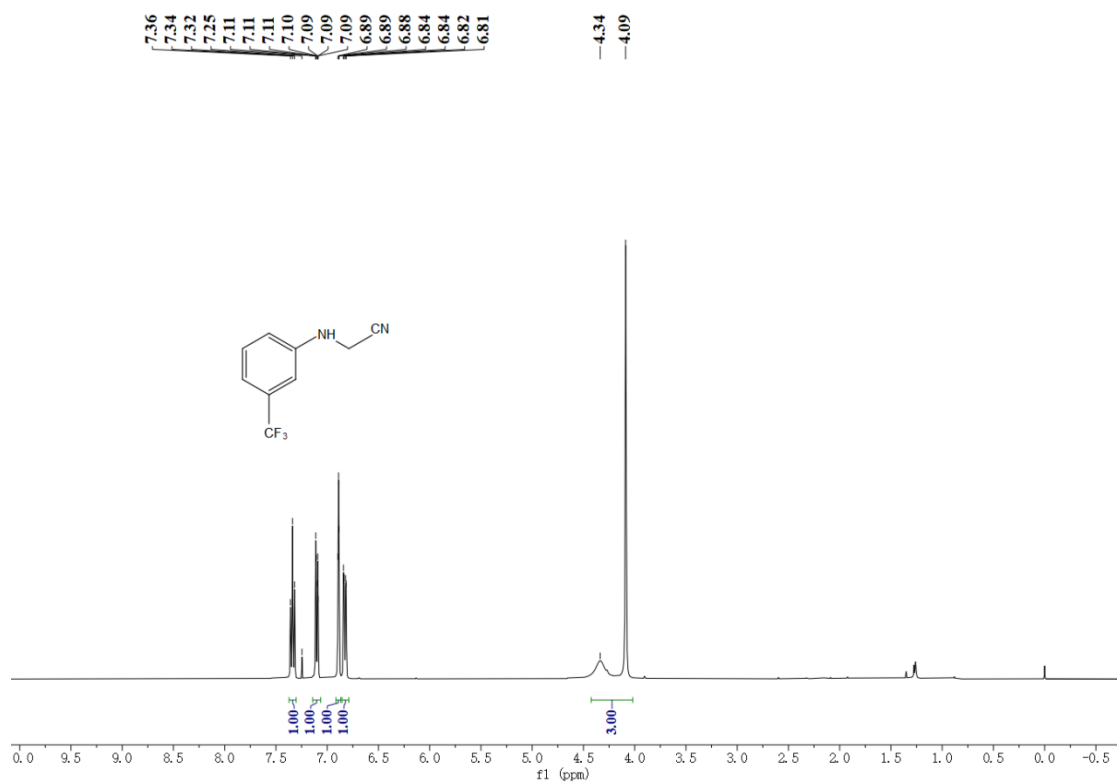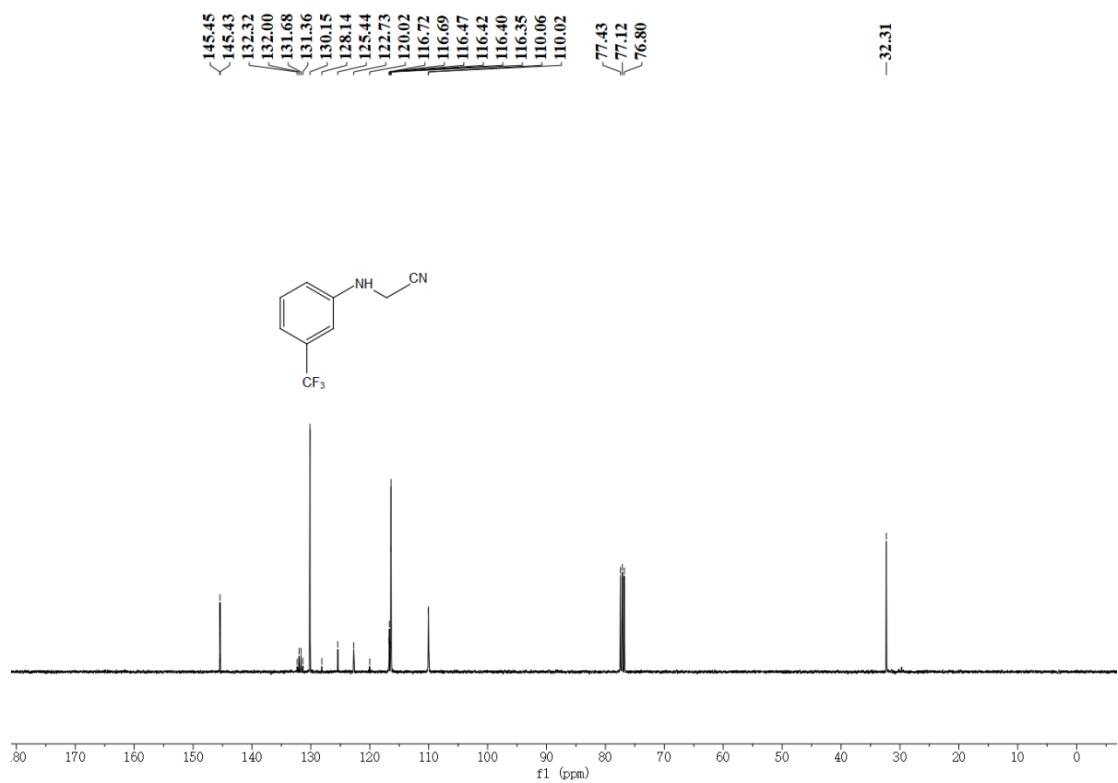

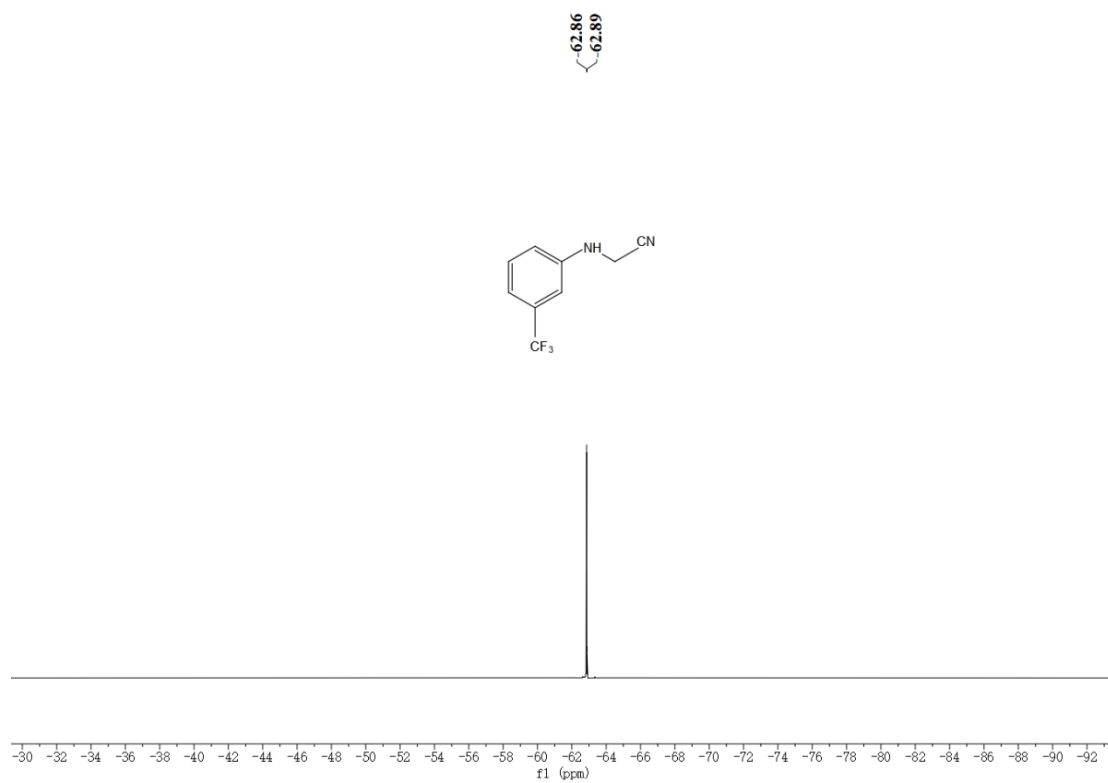

$^1\text{H}$  NMR (400 MHz,  $\text{CDCl}_3$ ) and  $^{13}\text{C}$  NMR (100 MHz,  $\text{CDCl}_3$ ) for **2n**

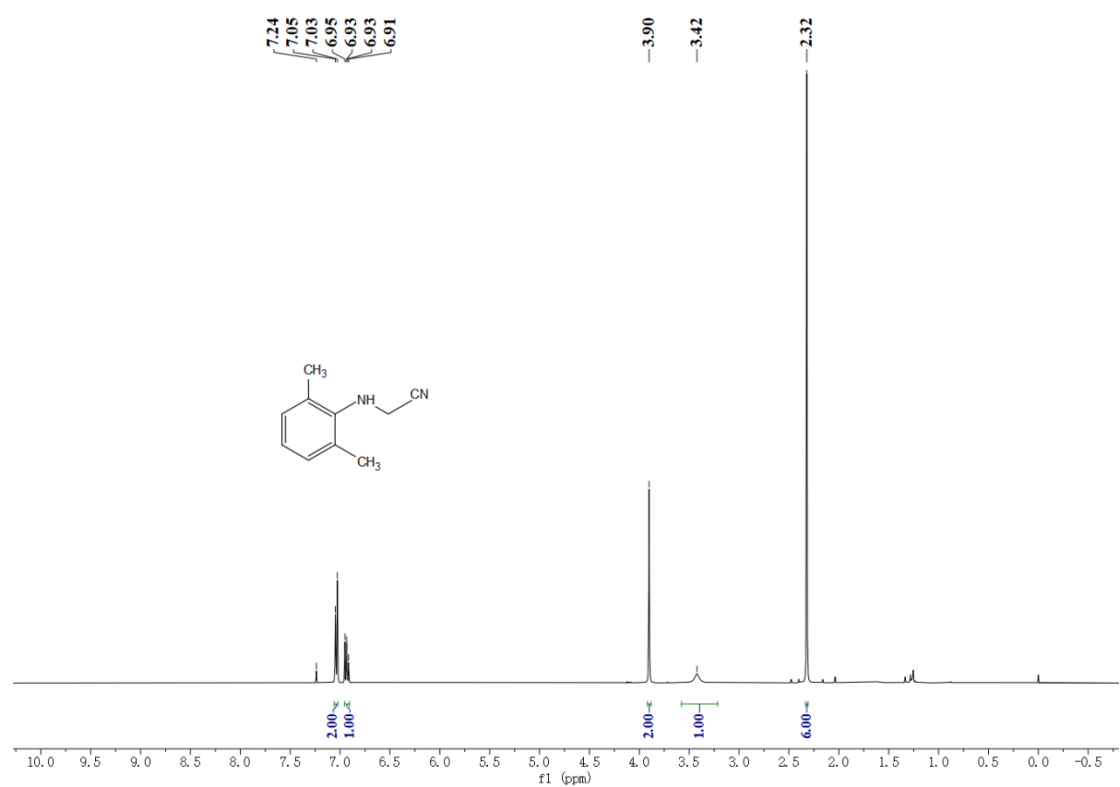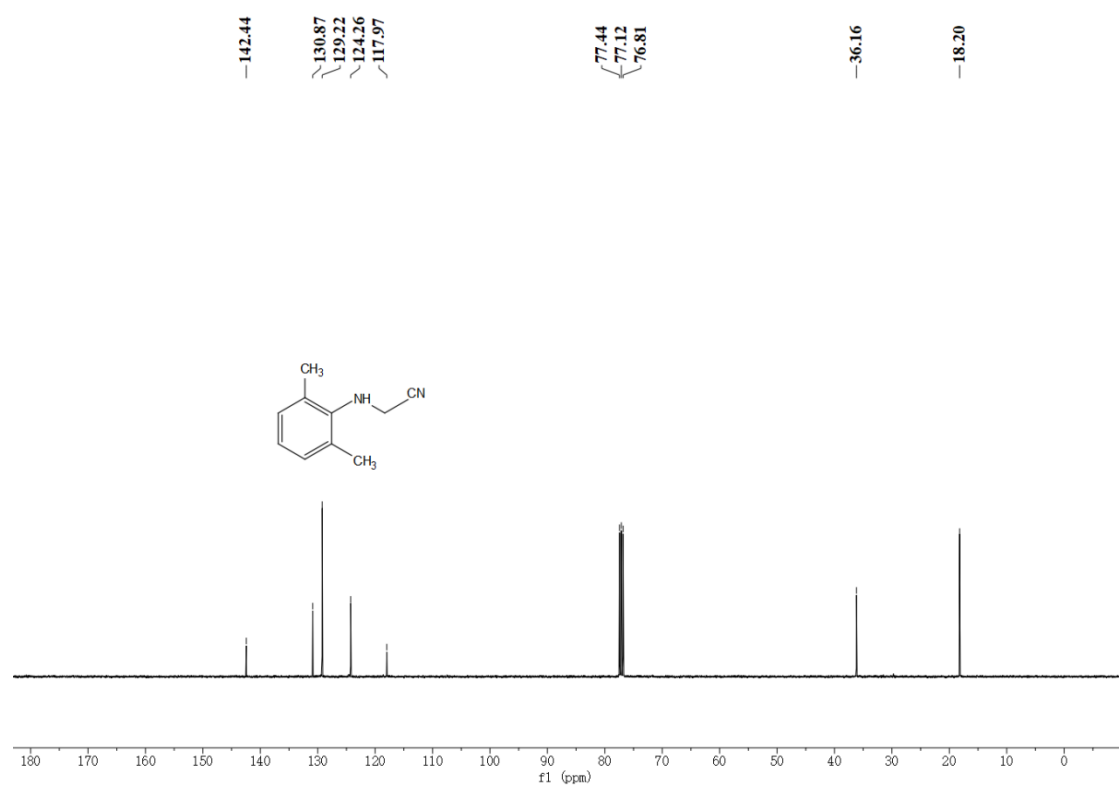

$^1\text{H}$  NMR (400 MHz,  $\text{CDCl}_3$ ) and  $^{13}\text{C}$  NMR (100 MHz,  $\text{CDCl}_3$ ) for **2o**

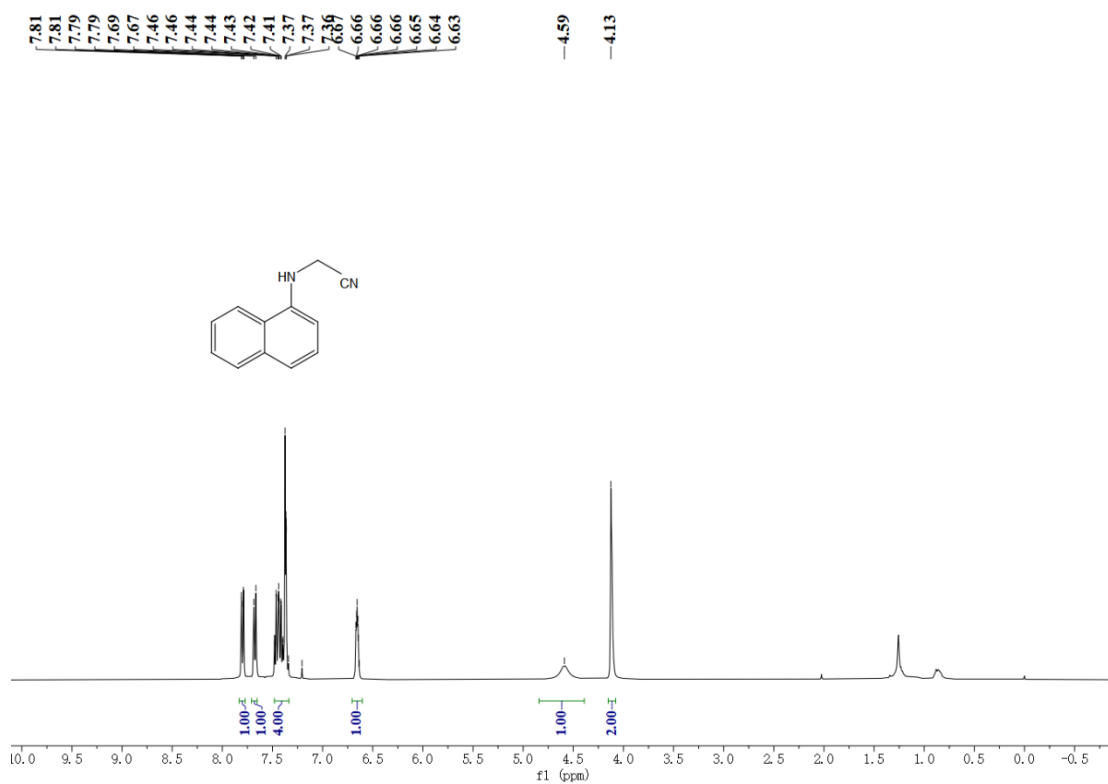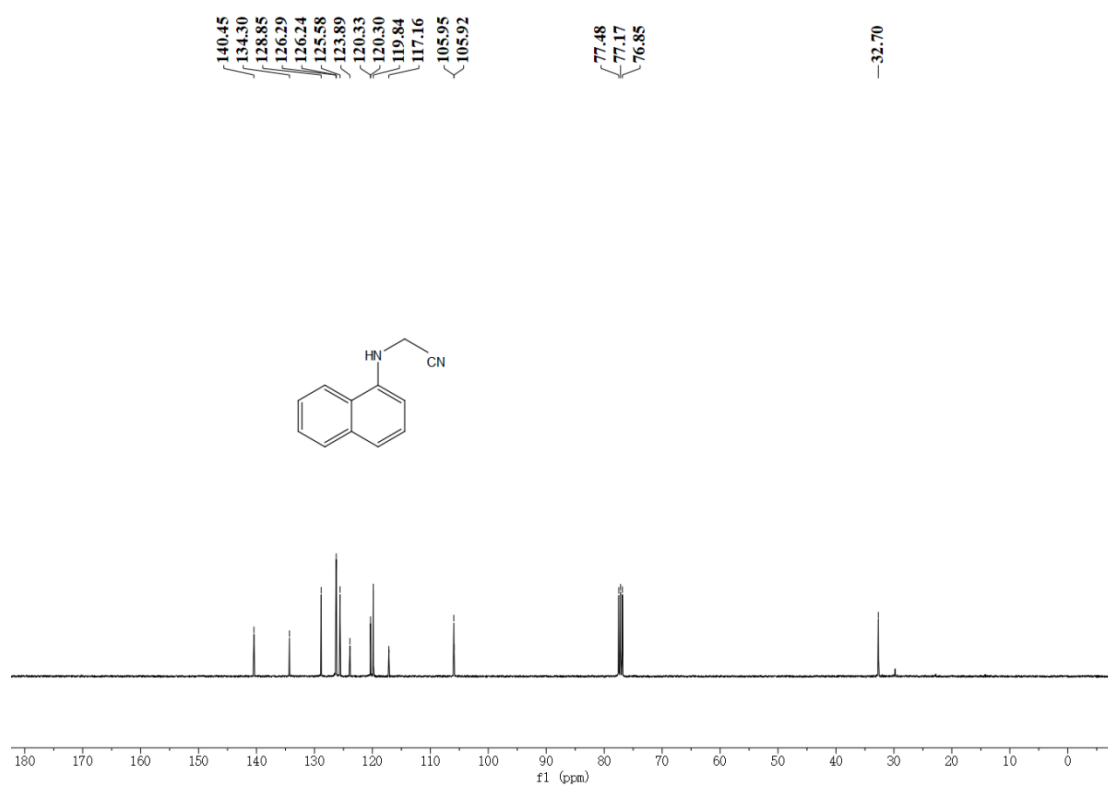

$^1\text{H}$  NMR (500 MHz,  $\text{CDCl}_3$ ) and  $^{13}\text{C}$  NMR (126 MHz,  $\text{CDCl}_3$ ) for **2p**

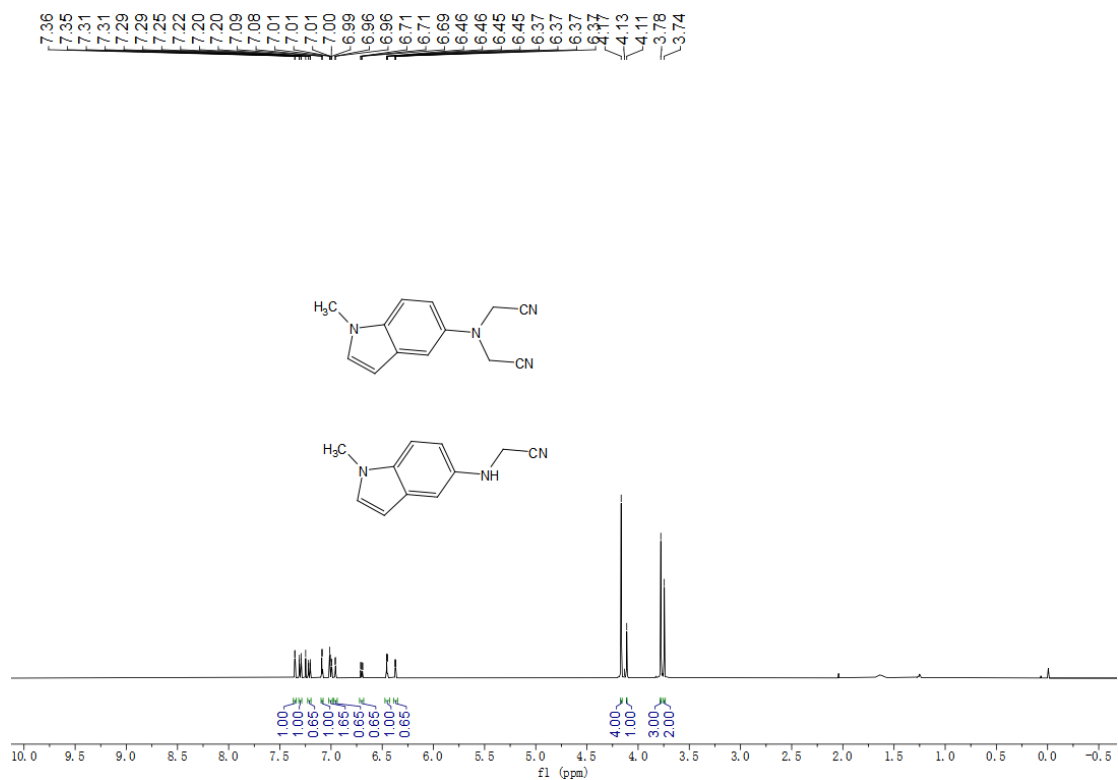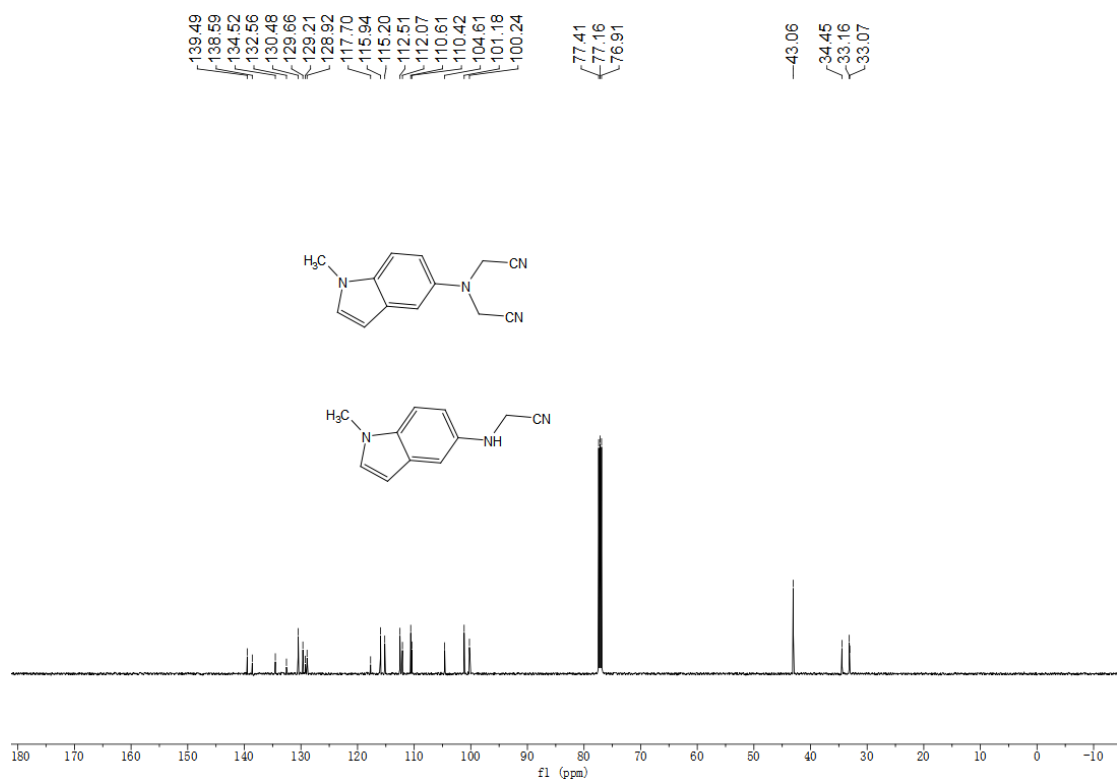

$^1\text{H}$  NMR (400 MHz,  $\text{CDCl}_3$ ) and  $^{13}\text{C}$  NMR (100 MHz,  $\text{CDCl}_3$ ) for **2q**

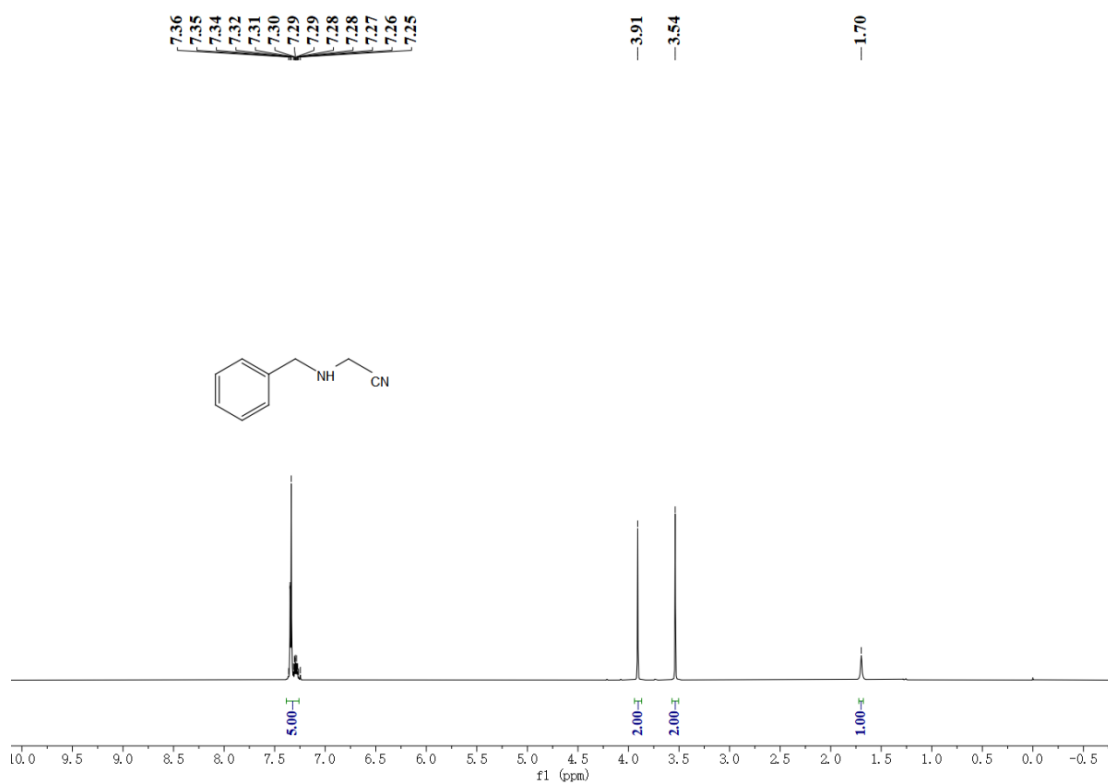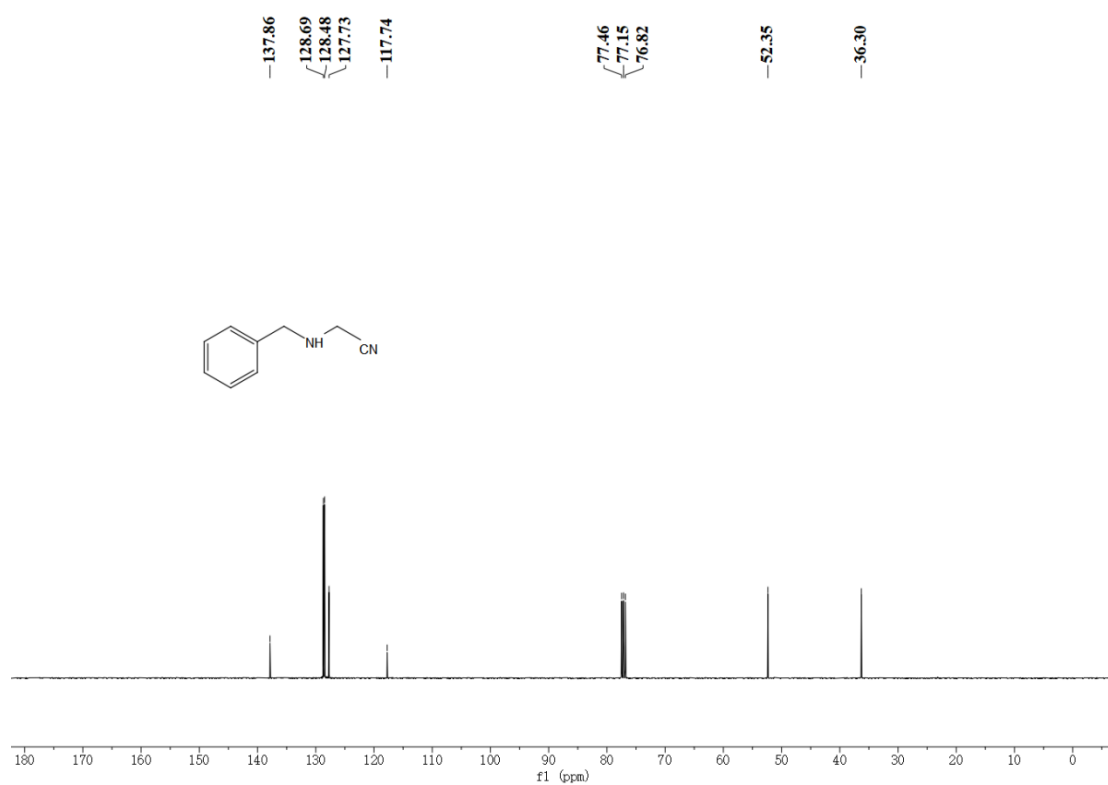

$^1\text{H}$  NMR (400 MHz,  $\text{CDCl}_3$ ) and  $^{13}\text{C}$  NMR (100 MHz,  $\text{CDCl}_3$ ) spectra for **2r**

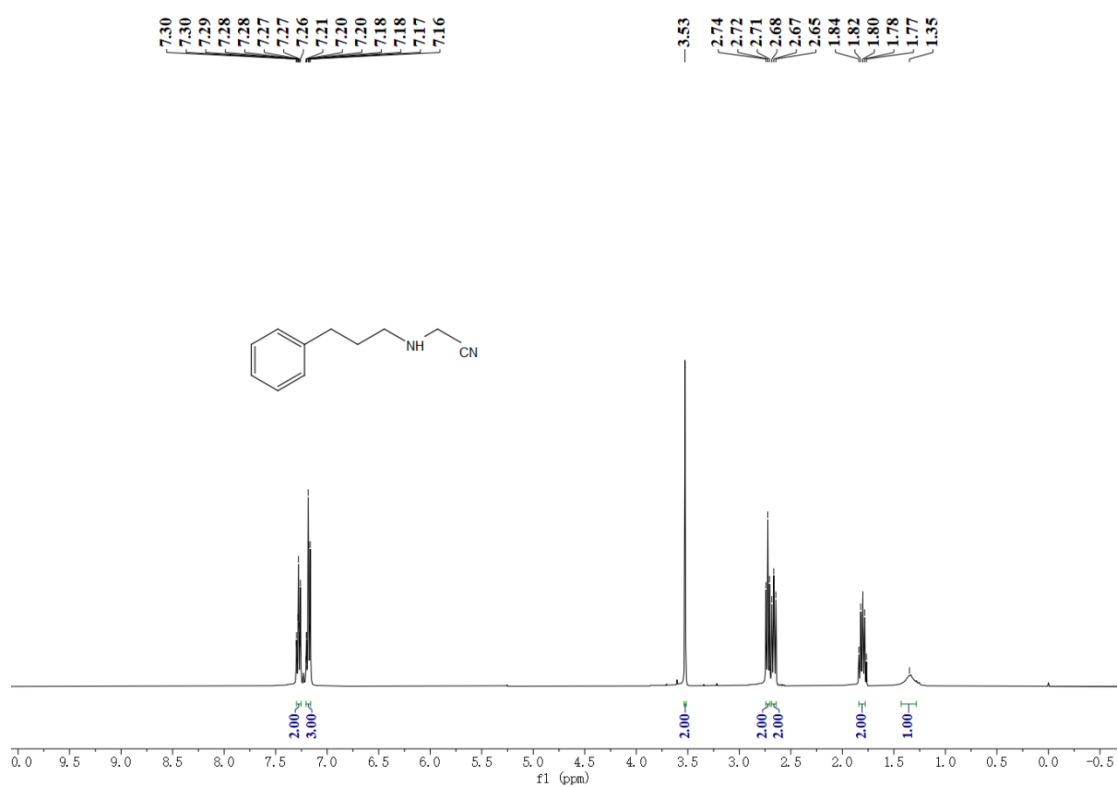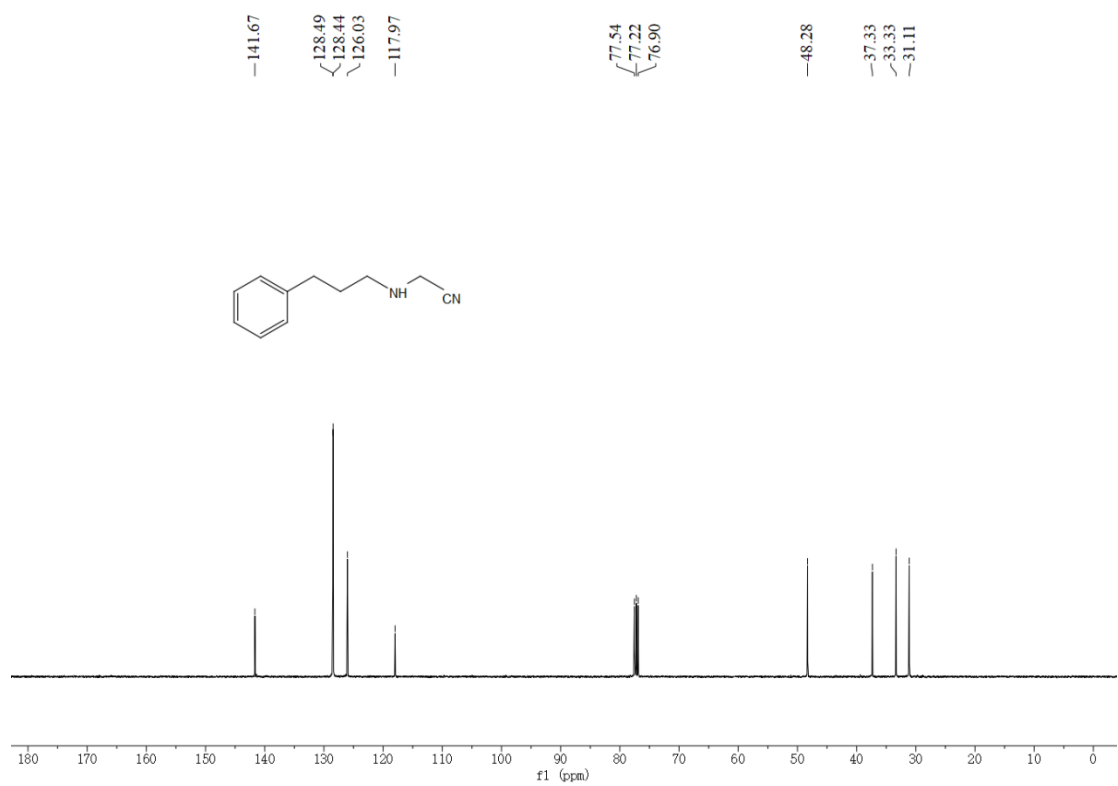

$^1\text{H}$  NMR (400 MHz,  $\text{CDCl}_3$ ) and  $^{13}\text{C}$  NMR (100 MHz,  $\text{CDCl}_3$ ) spectra for **2s**

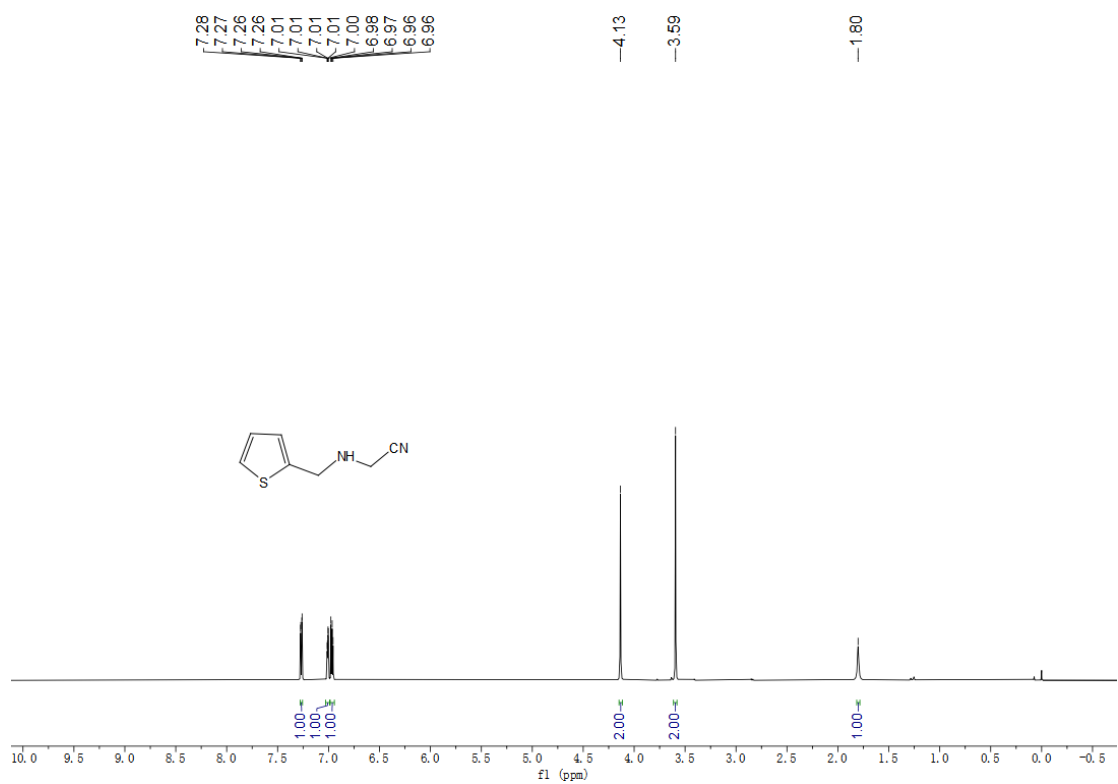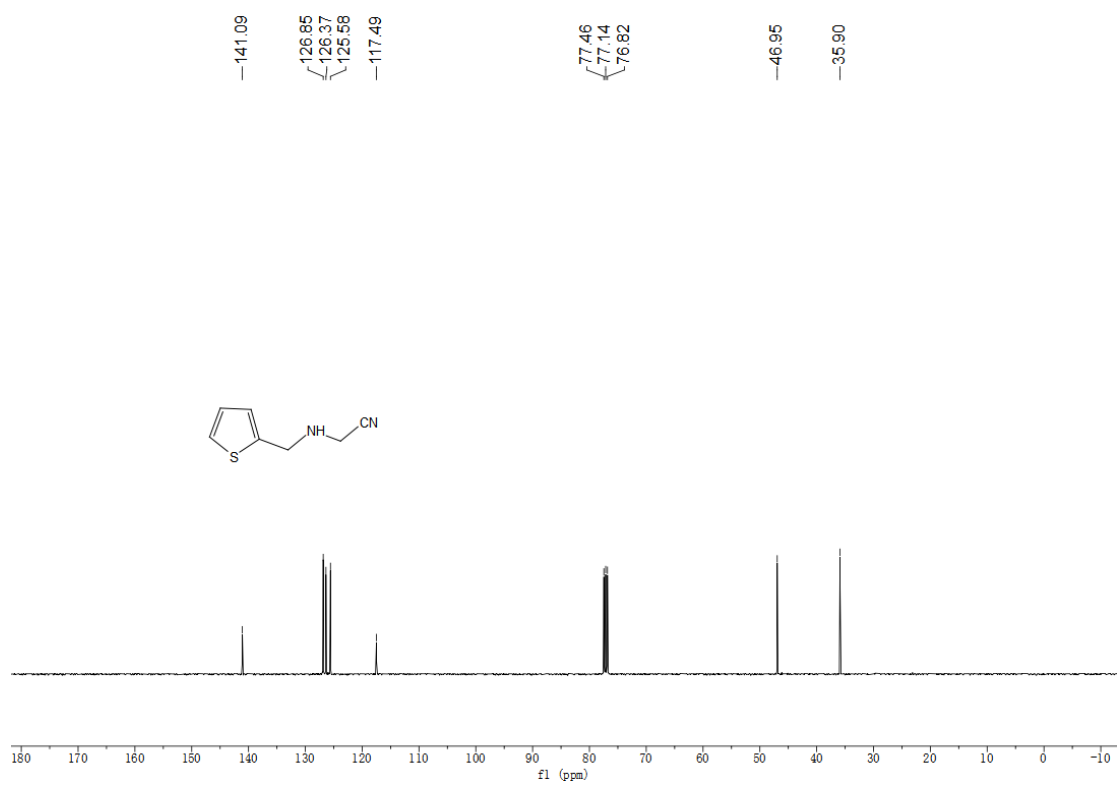



$^1\text{H}$  NMR (400 MHz,  $\text{CDCl}_3$ ) and  $^{13}\text{C}$  NMR (100 MHz,  $\text{CDCl}_3$ ) spectra for **2t**

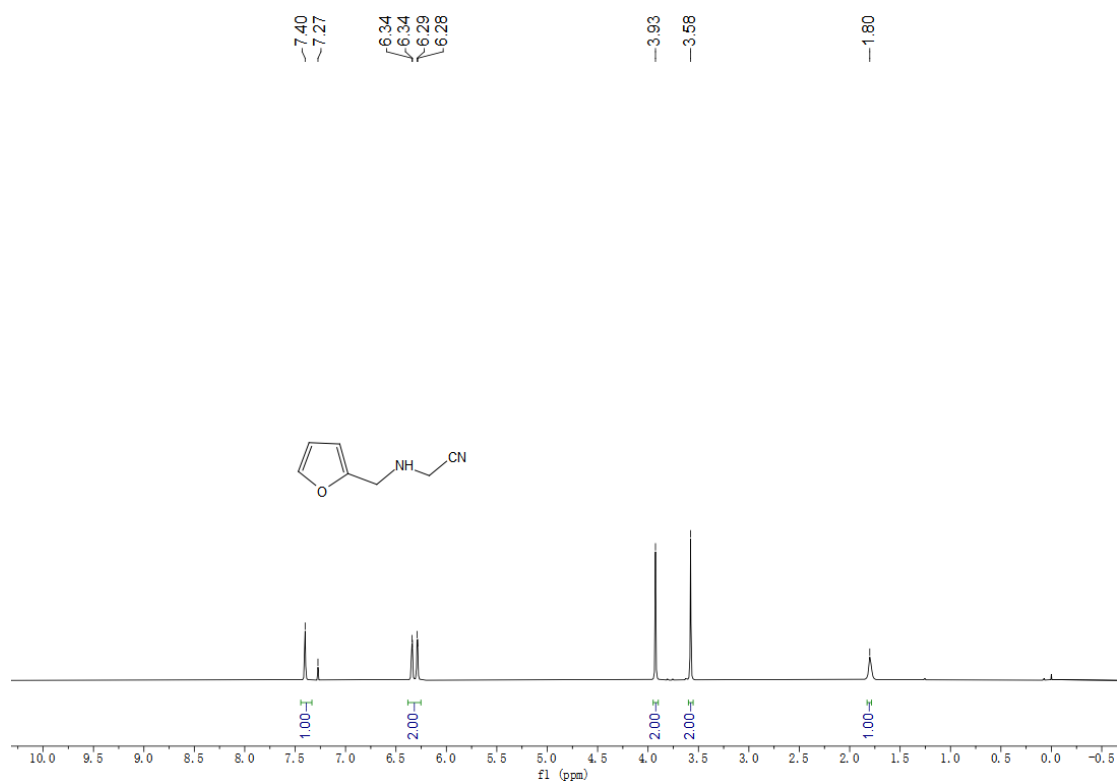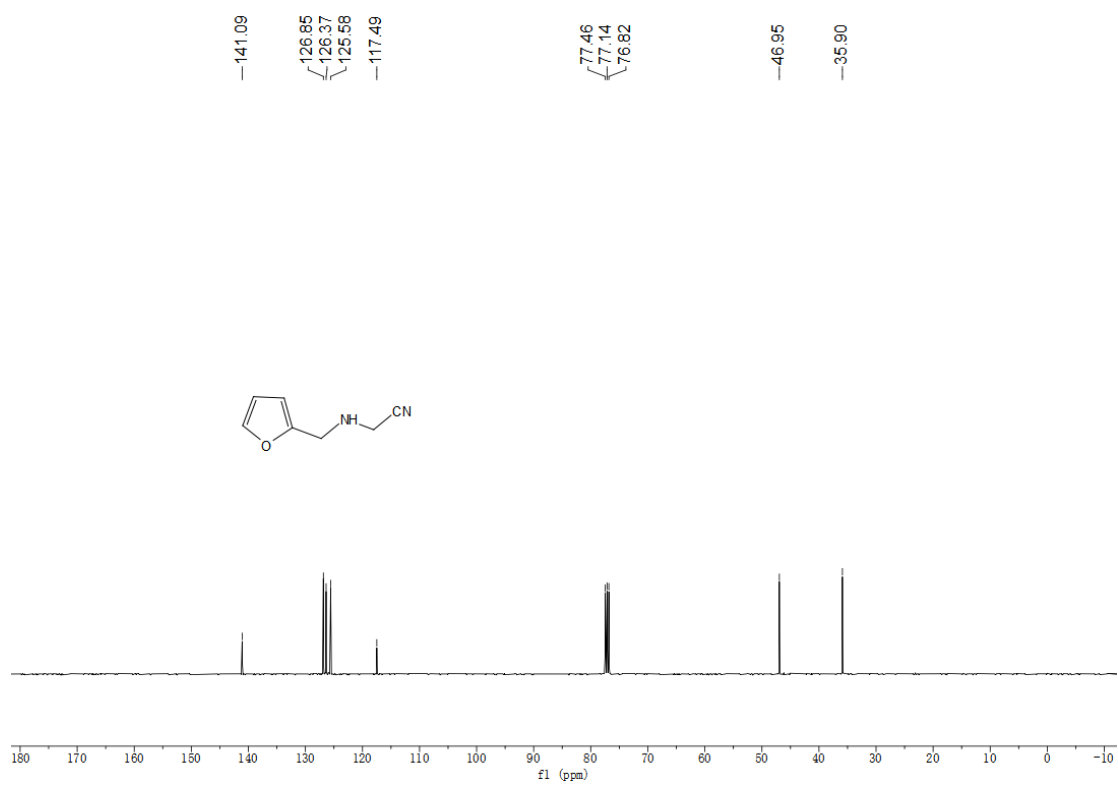

$^1\text{H}$  NMR (400 MHz,  $\text{CDCl}_3$ ) and  $^{13}\text{C}$  NMR (100 MHz,  $\text{CDCl}_3$ ) spectra for **2u**

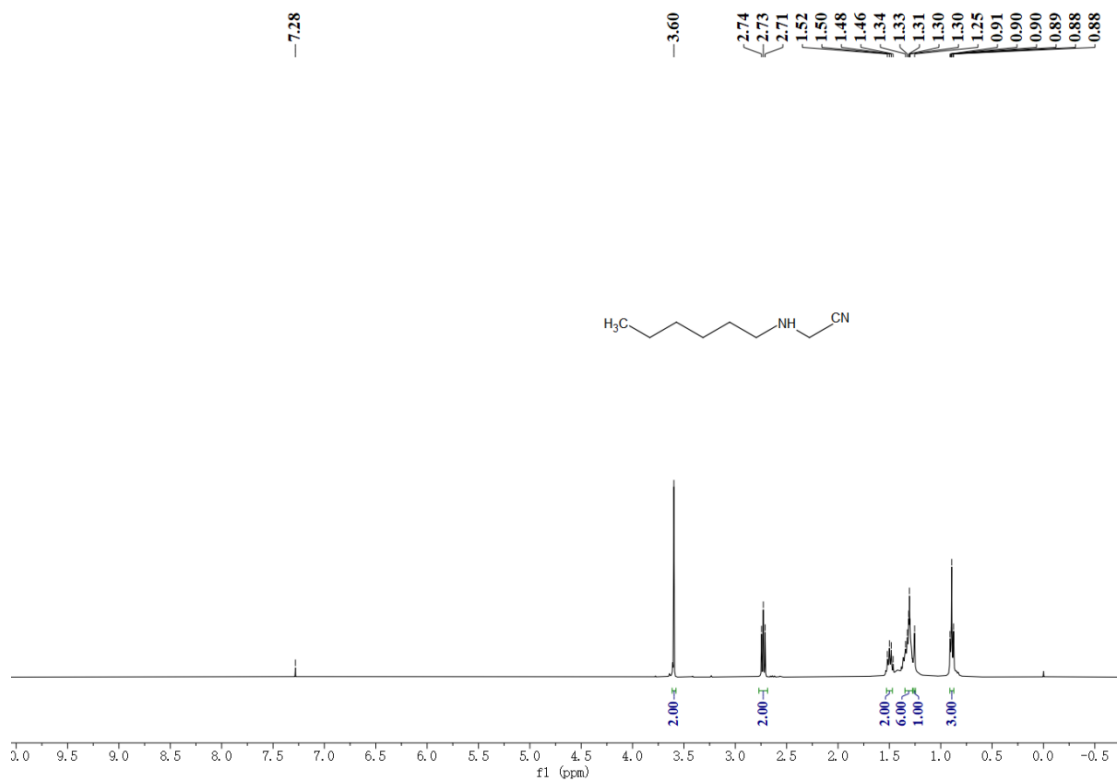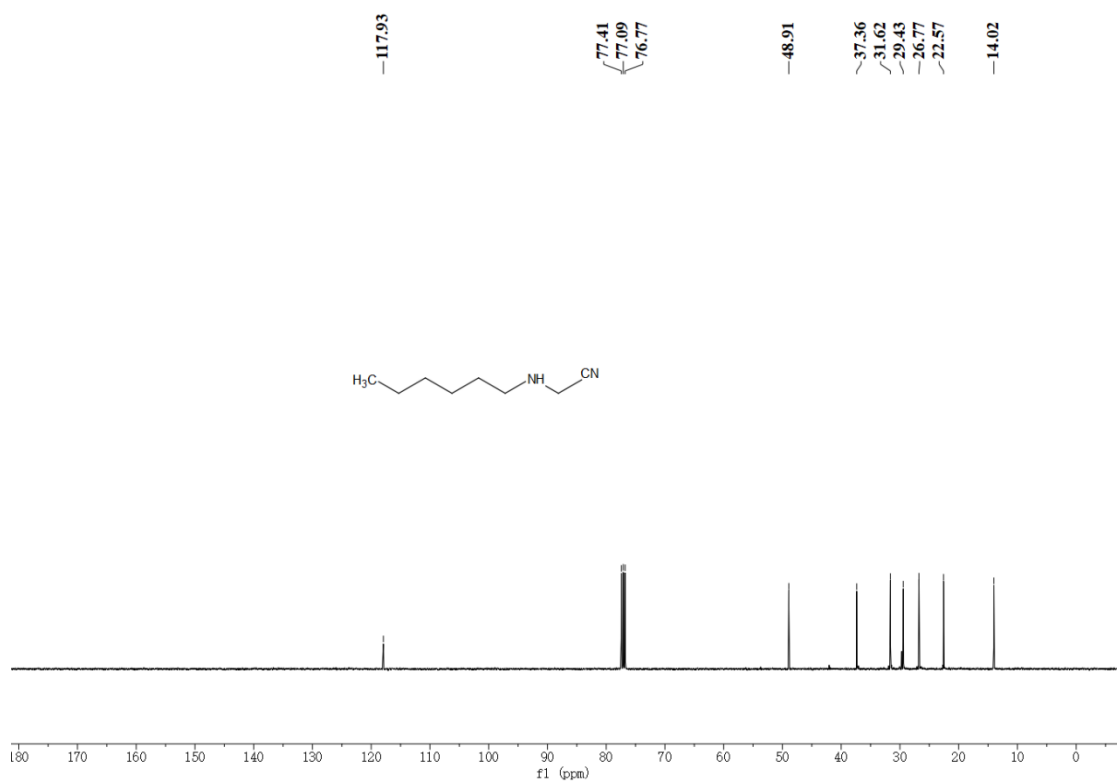

$^1\text{H}$  NMR (400 MHz,  $\text{CDCl}_3$ ) and  $^{13}\text{C}$  NMR (100 MHz,  $\text{CDCl}_3$ ) spectra for **2v**

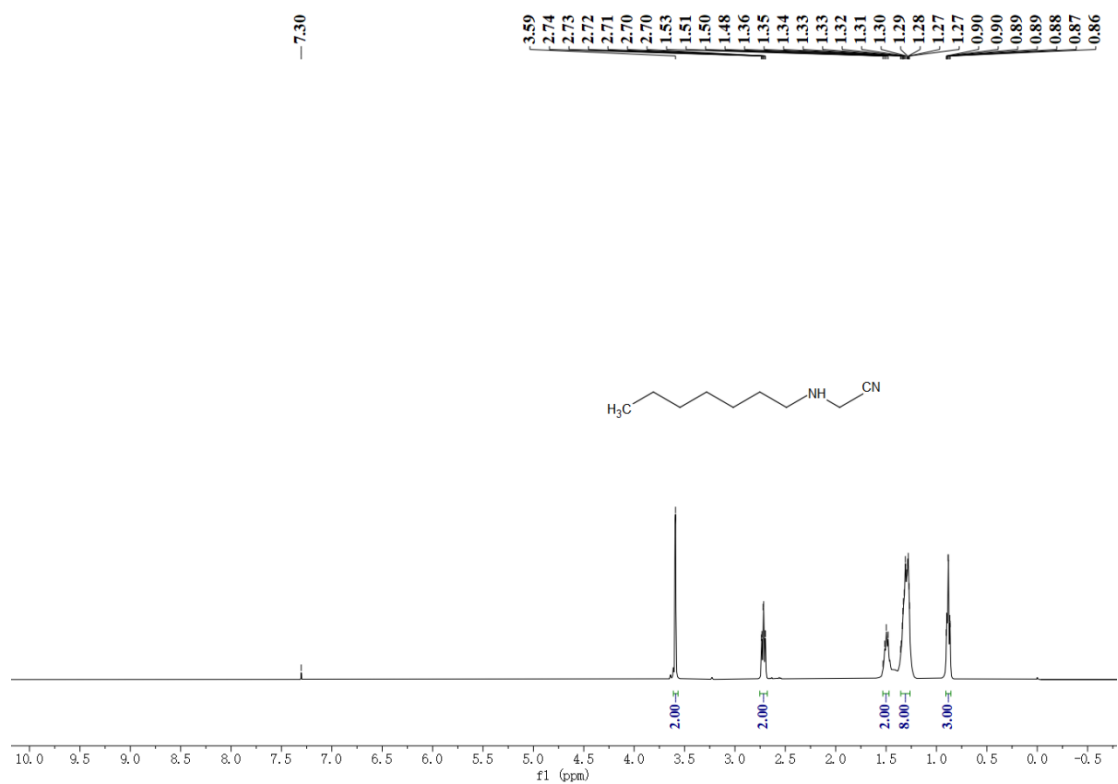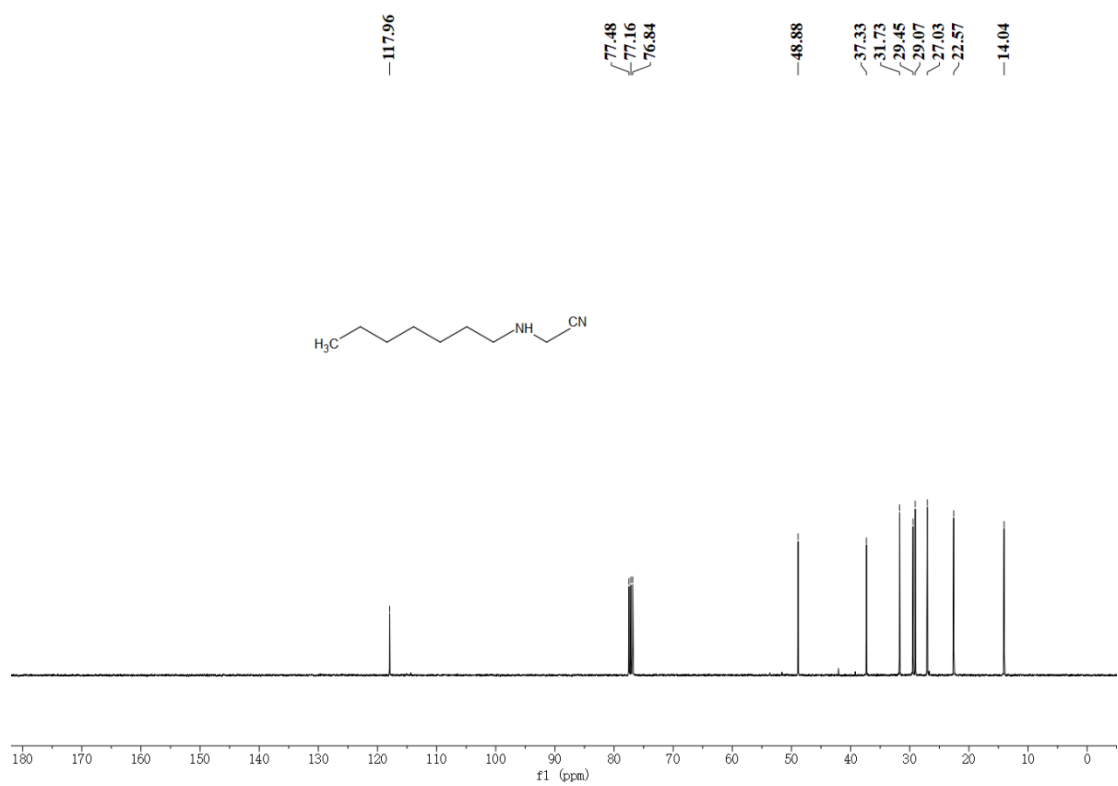

$^1\text{H}$  NMR (400 MHz,  $\text{DMSO-}d_6$ ) and  $^{13}\text{C}$  NMR (100 MHz,  $\text{DMSO-}d_6$ ) for **3a**

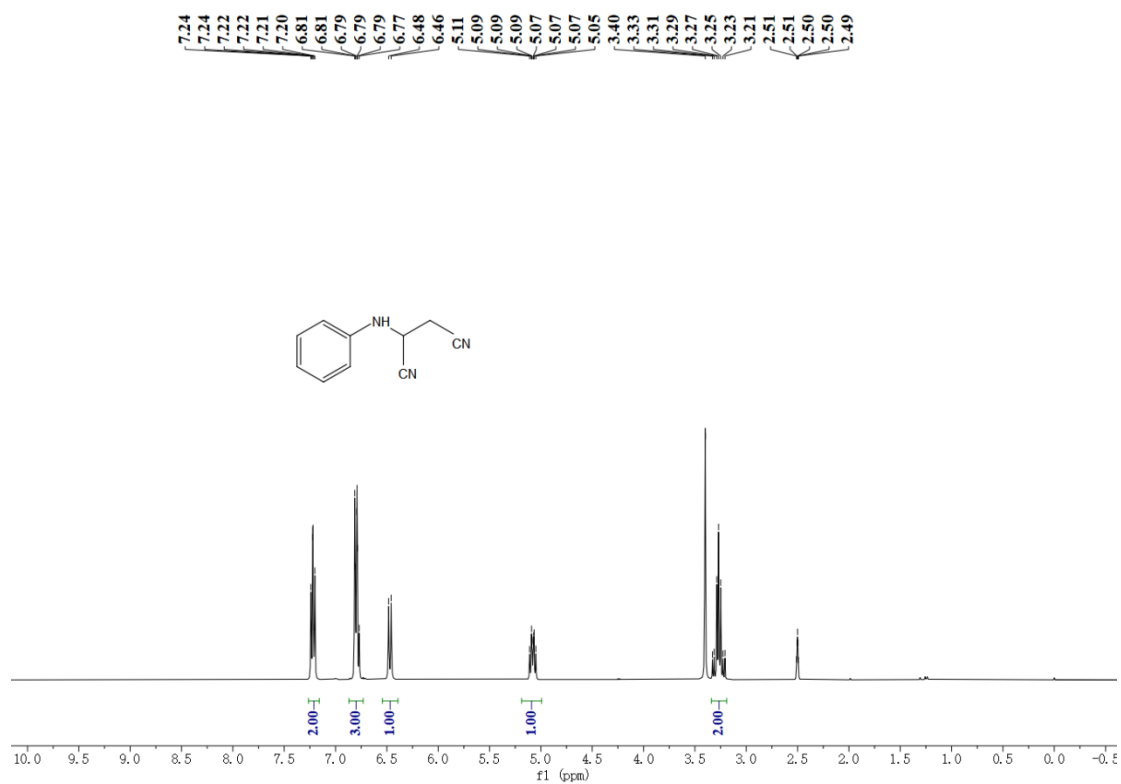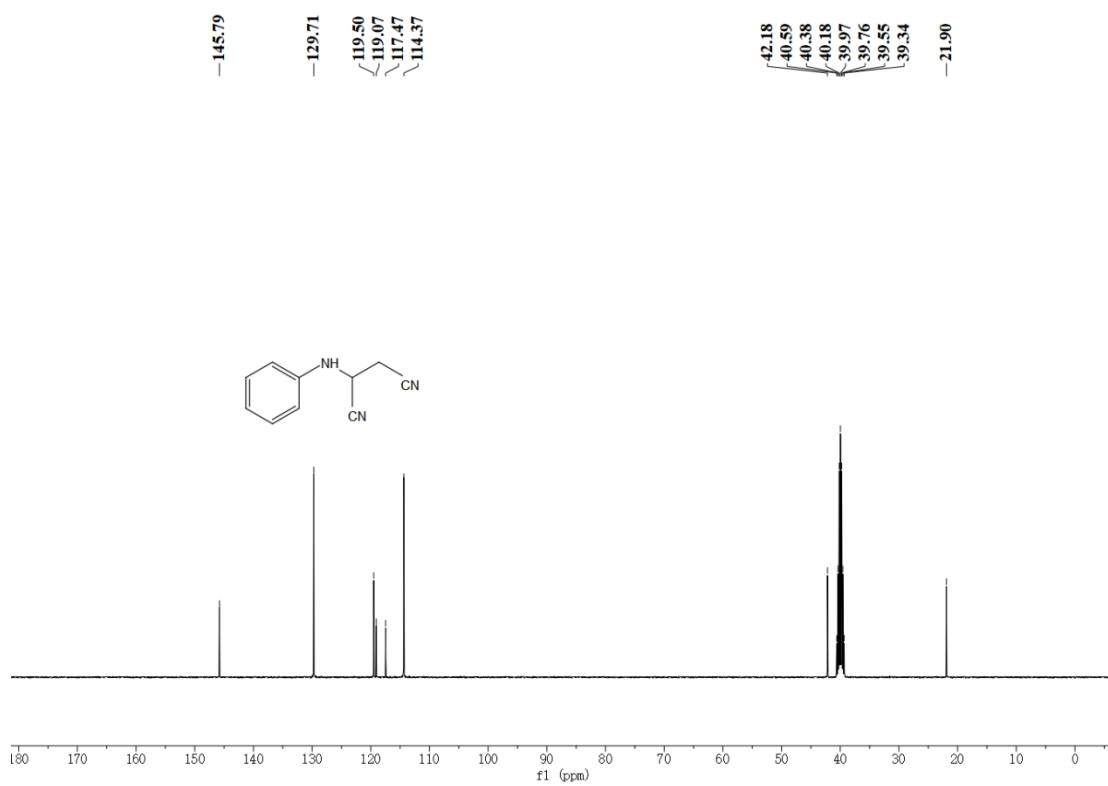

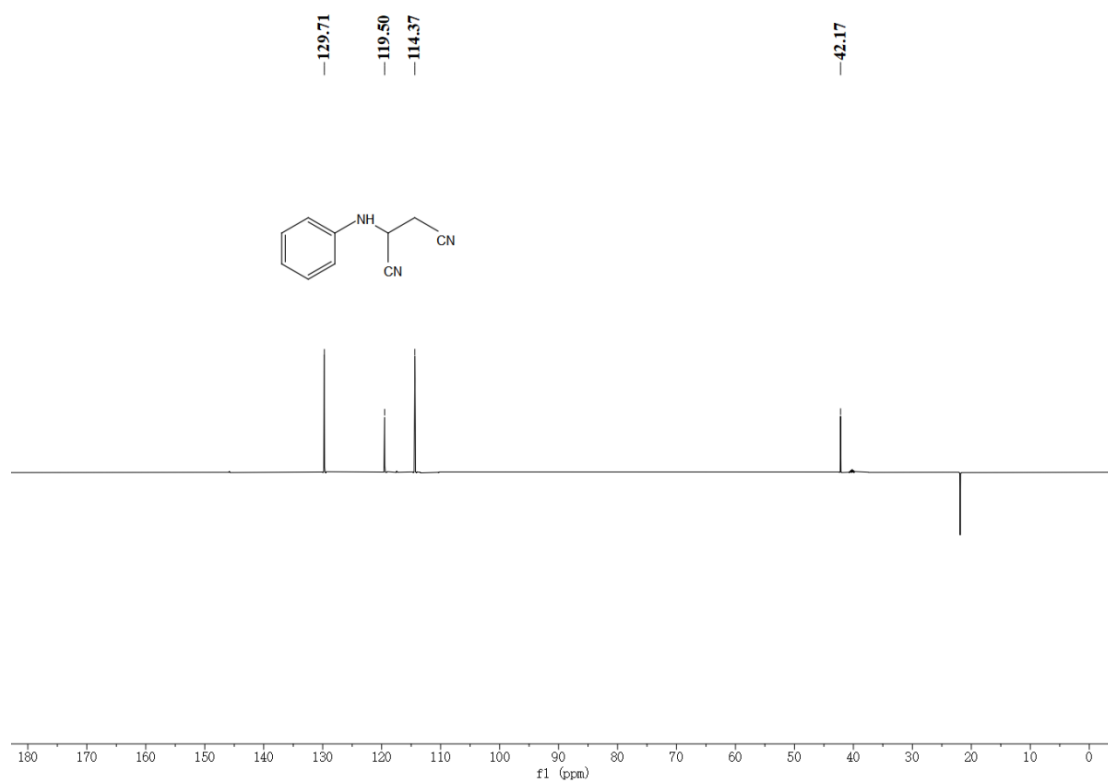

$^1\text{H}$  NMR (400 MHz,  $\text{CDCl}_3$ ) and  $^{13}\text{C}$  NMR (100 MHz,  $\text{CDCl}_3$ ) for **3b**

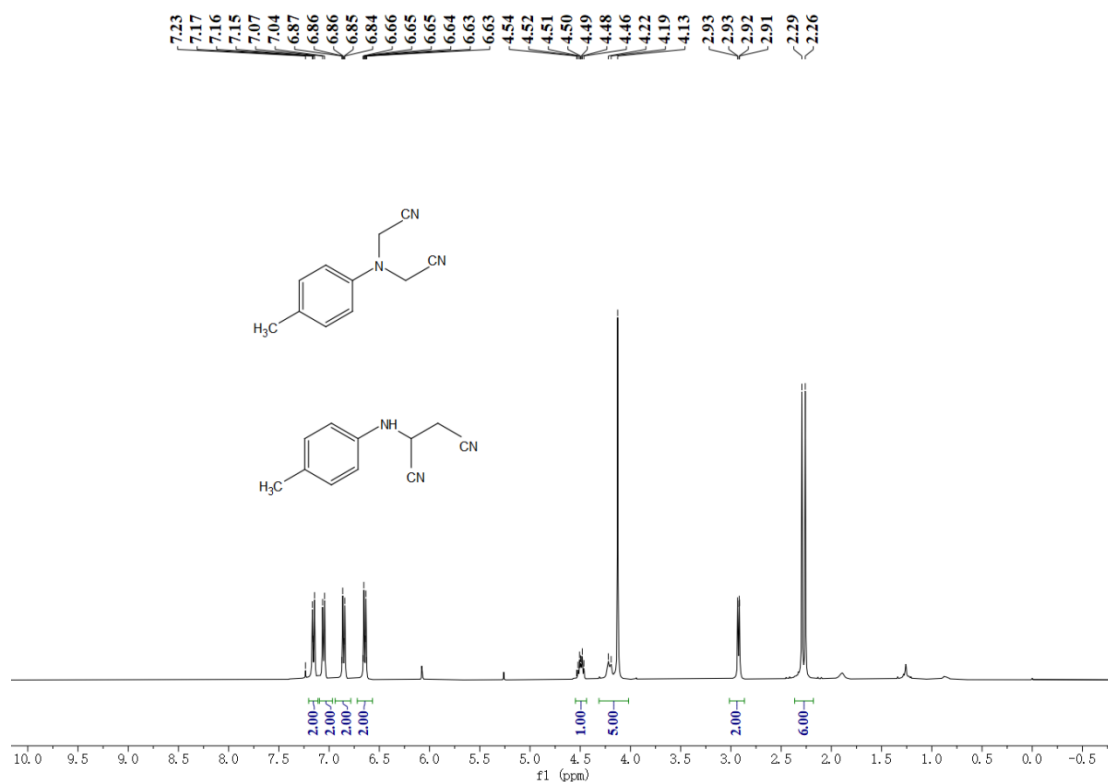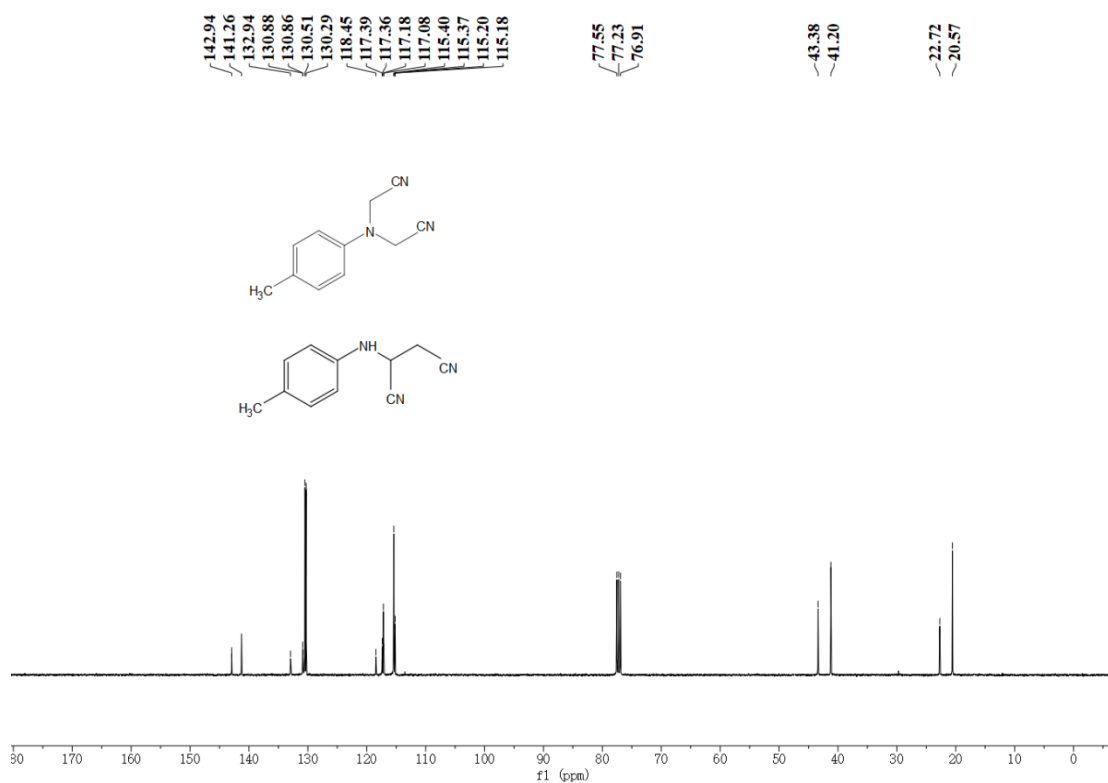

$^1\text{H}$  NMR (400 MHz,  $\text{CDCl}_3$ ) and  $^{13}\text{C}$  NMR (100 MHz,  $\text{CDCl}_3$ ) for **3c**

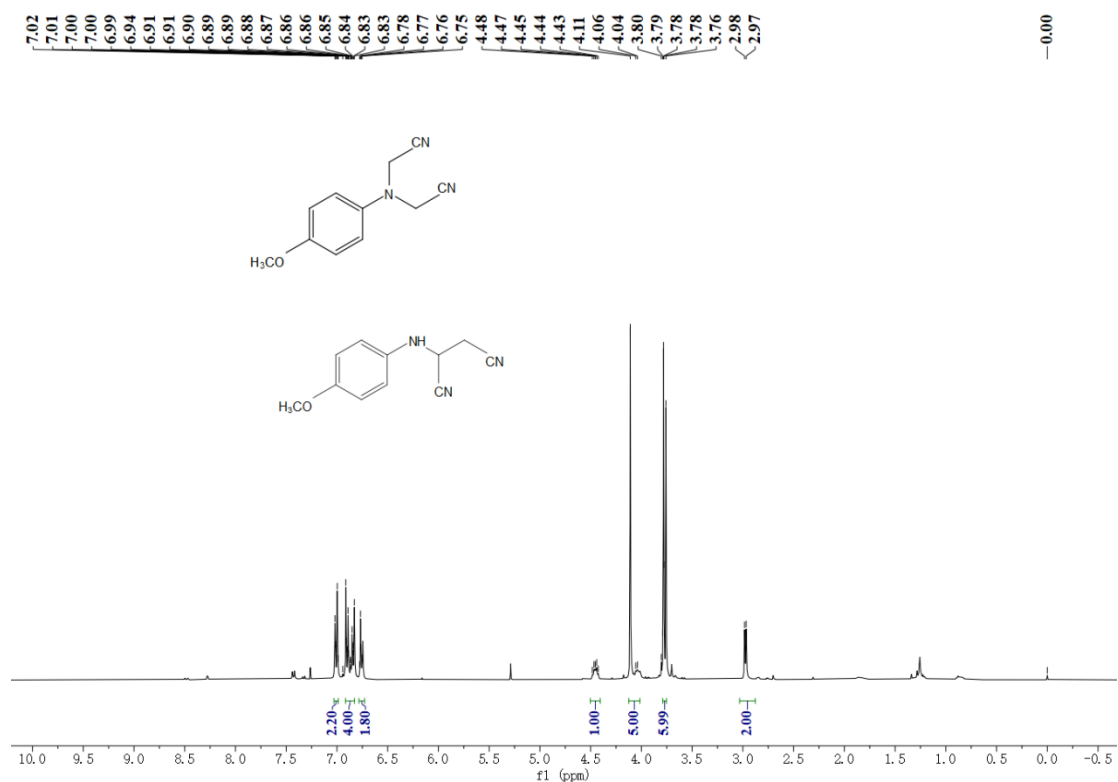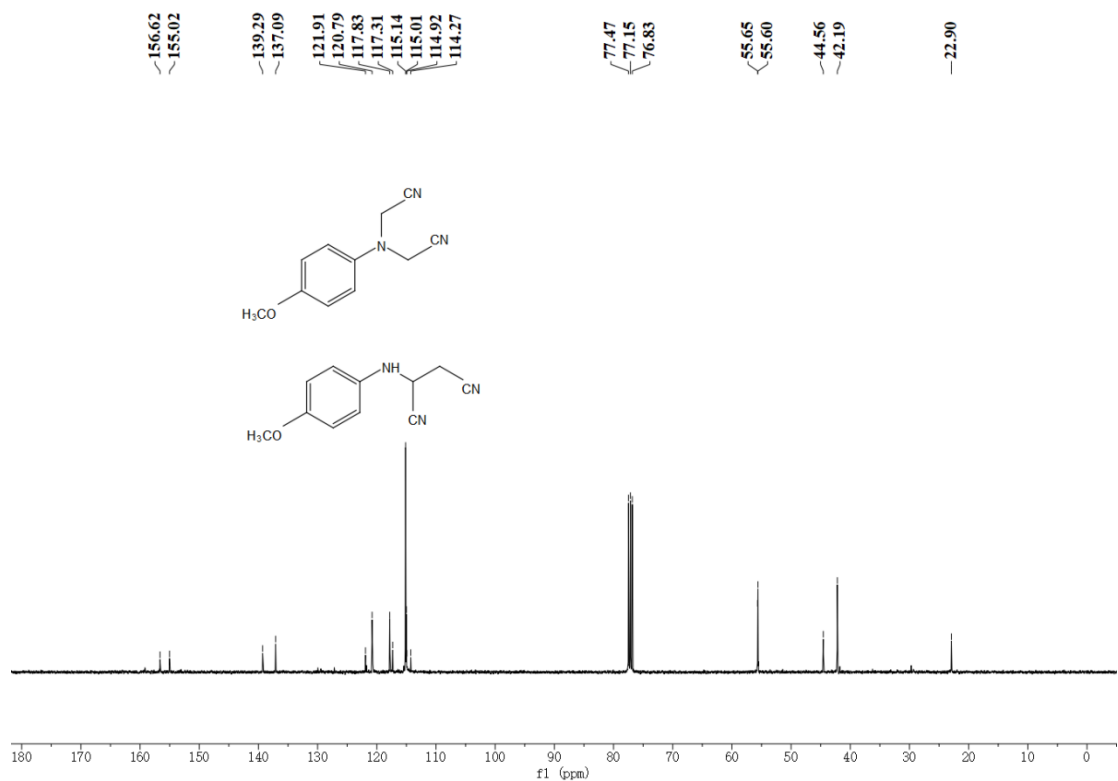

$^1\text{H}$  NMR (400 MHz,  $\text{DMSO-}d_6$ ) and  $^{13}\text{C}$  NMR (100 MHz,  $\text{DMSO-}d_6$ ) for **3d**

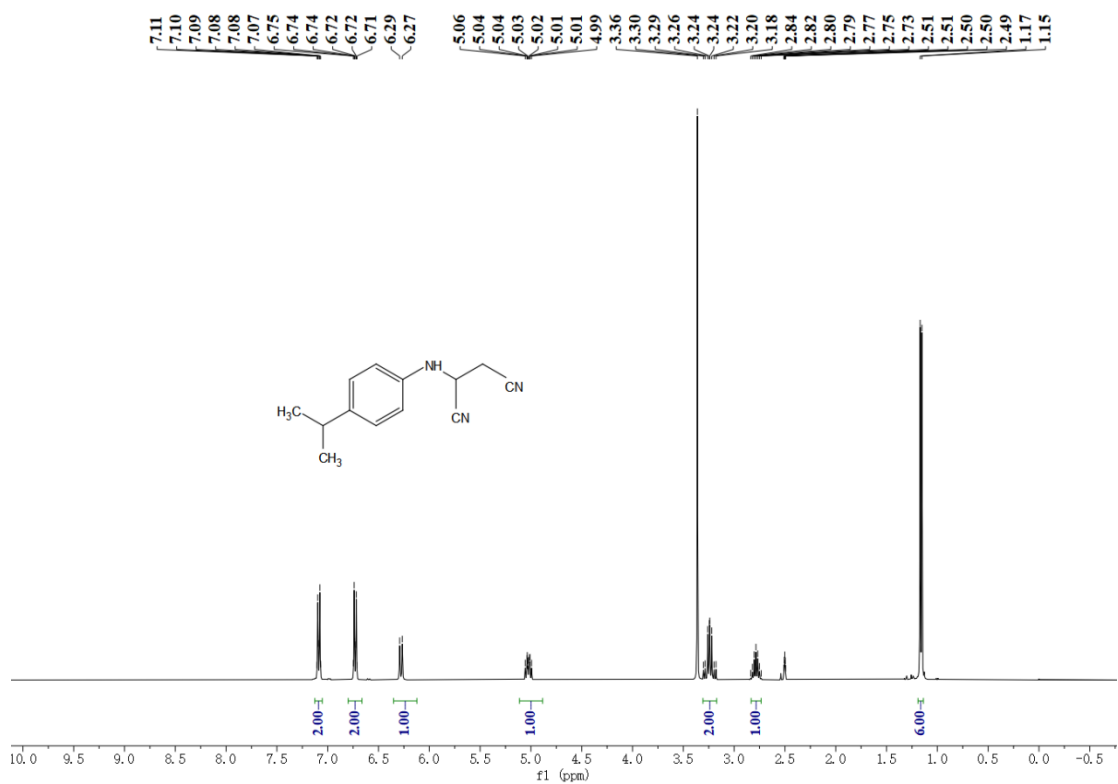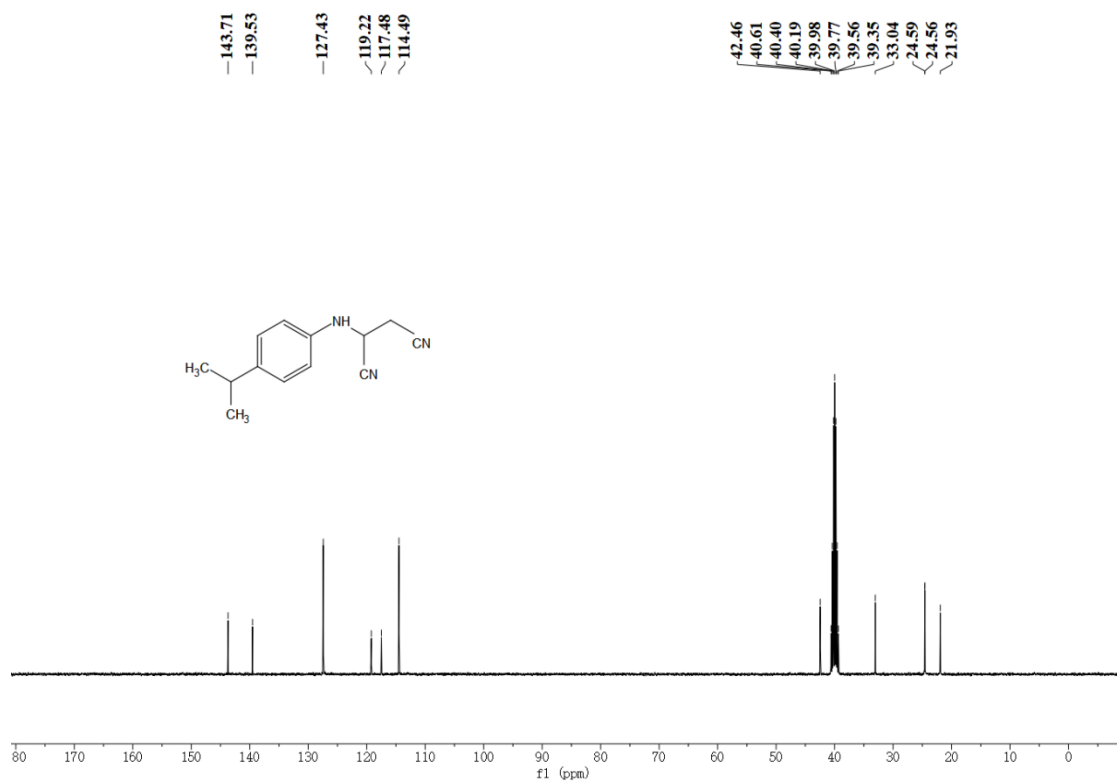



$^1\text{H}$  NMR (400 MHz,  $\text{DMSO-}d_6$ ) and  $^{13}\text{C}$  NMR (100 MHz,  $\text{DMSO-}d_6$ ) for **3e**

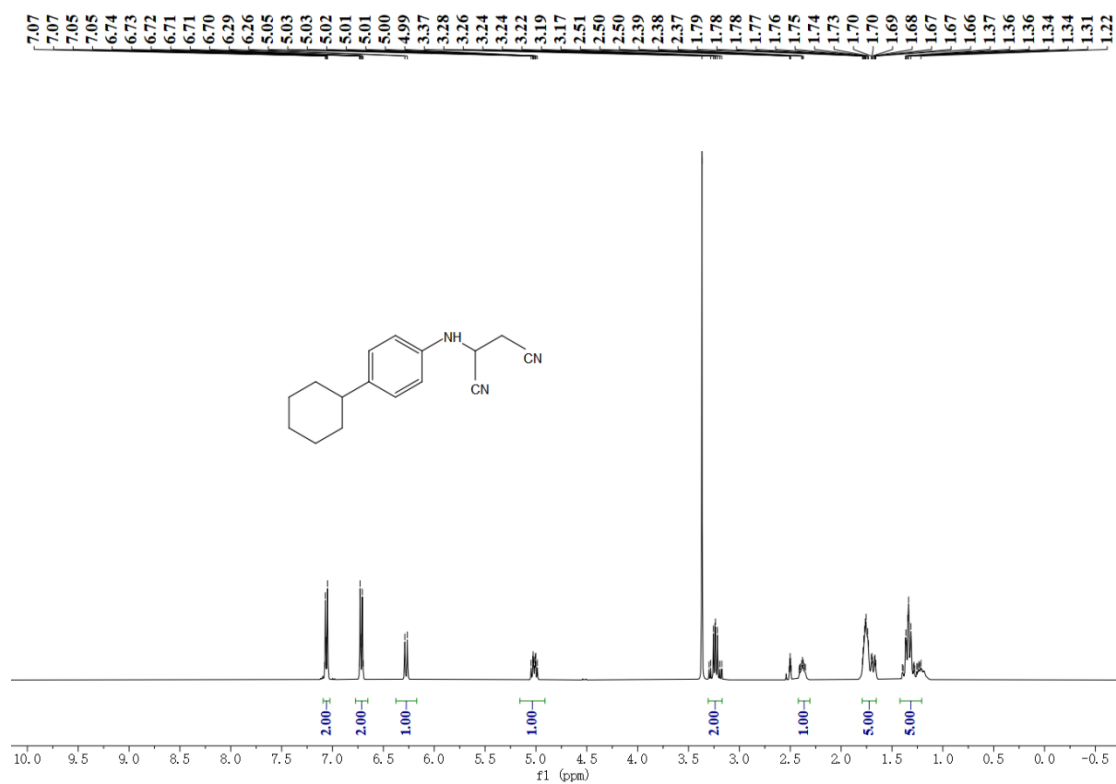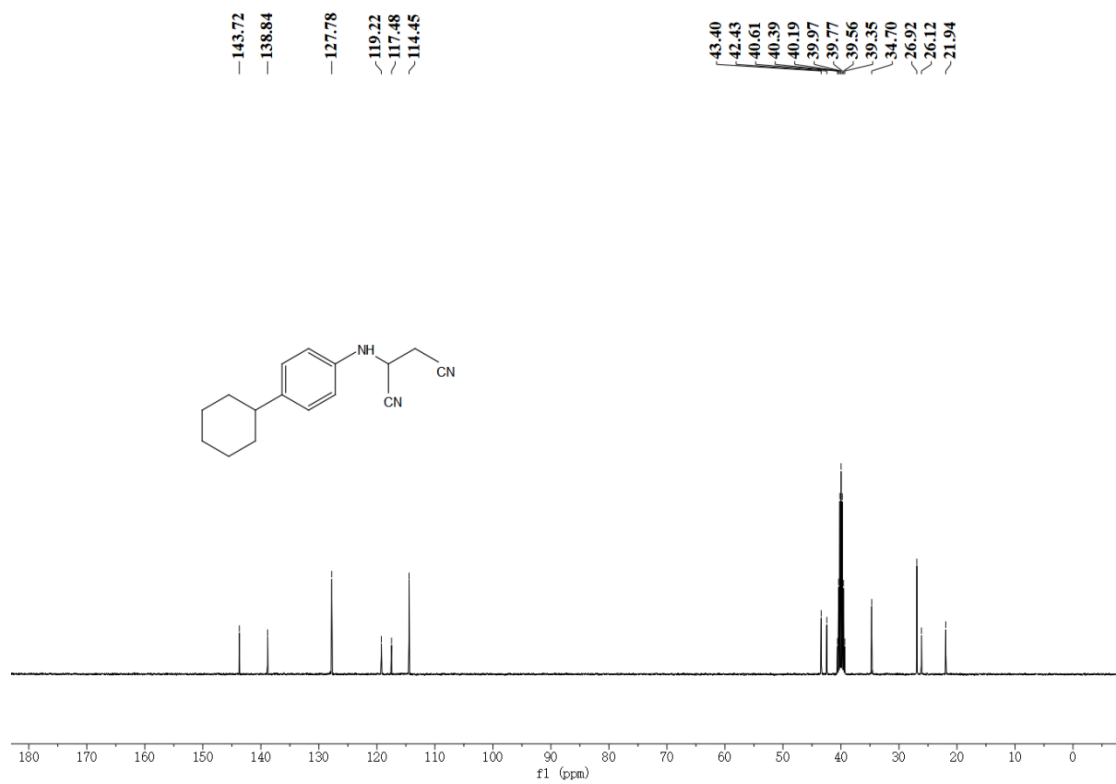

$^1\text{H}$  NMR (400 MHz,  $\text{DMSO-}d_6$ ) and  $^{13}\text{C}$  NMR (100 MHz,  $\text{DMSO-}d_6$ ) for **3f**

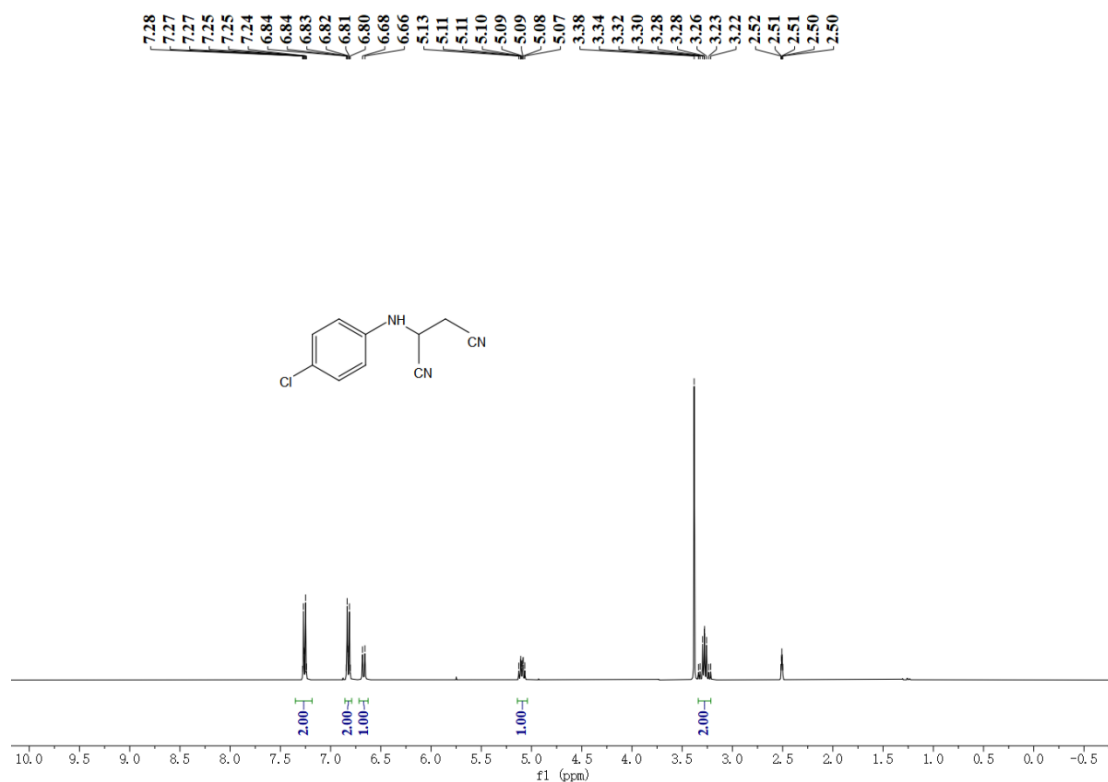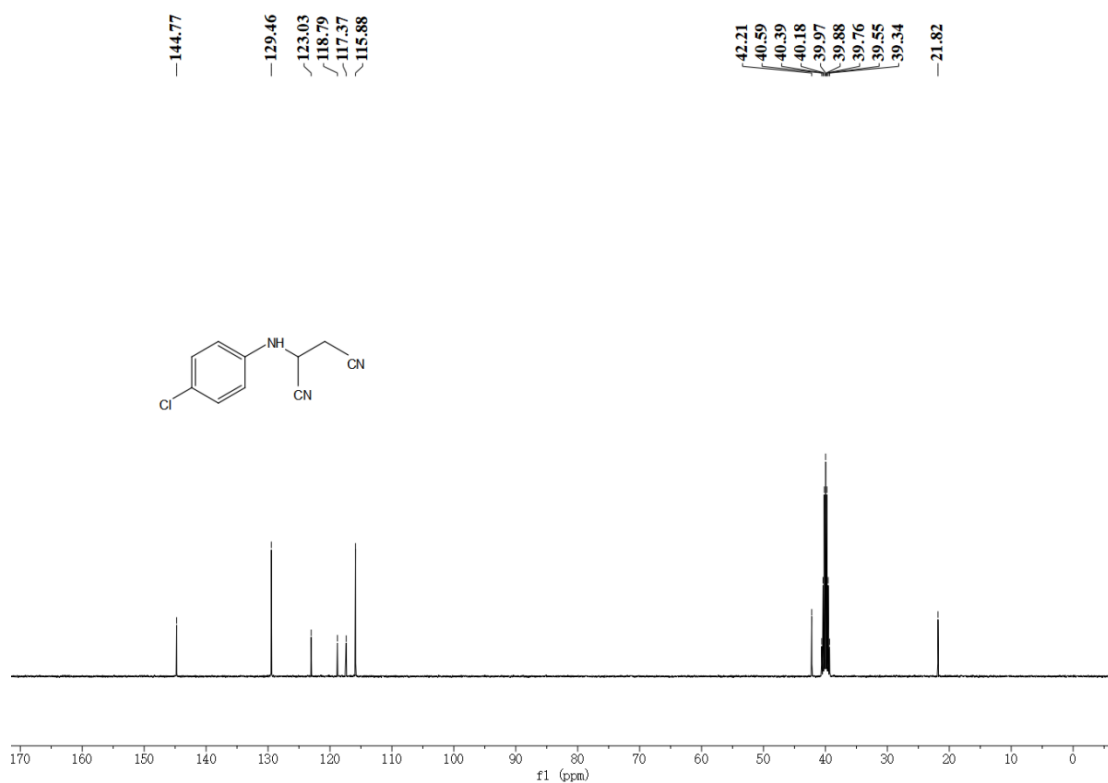

$^1\text{H}$  NMR (400 MHz,  $\text{DMSO-}d_6$ ) and  $^{13}\text{C}$  NMR (100 MHz,  $\text{DMSO-}d_6$ ) for **3g**

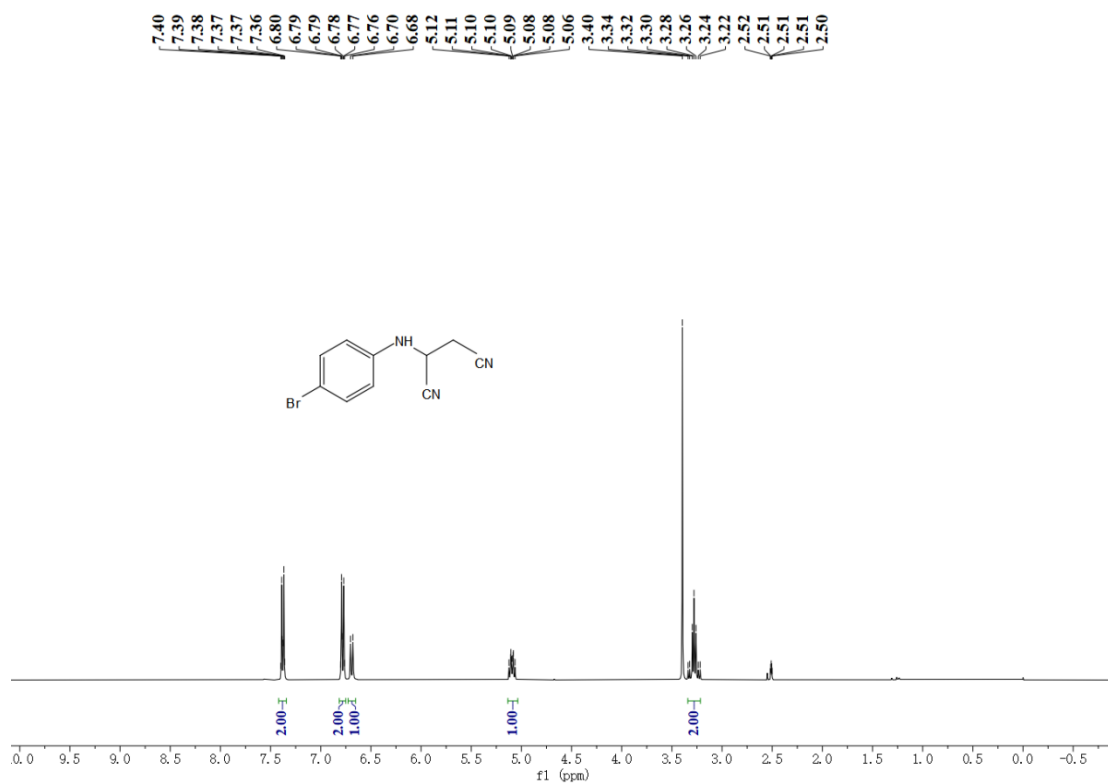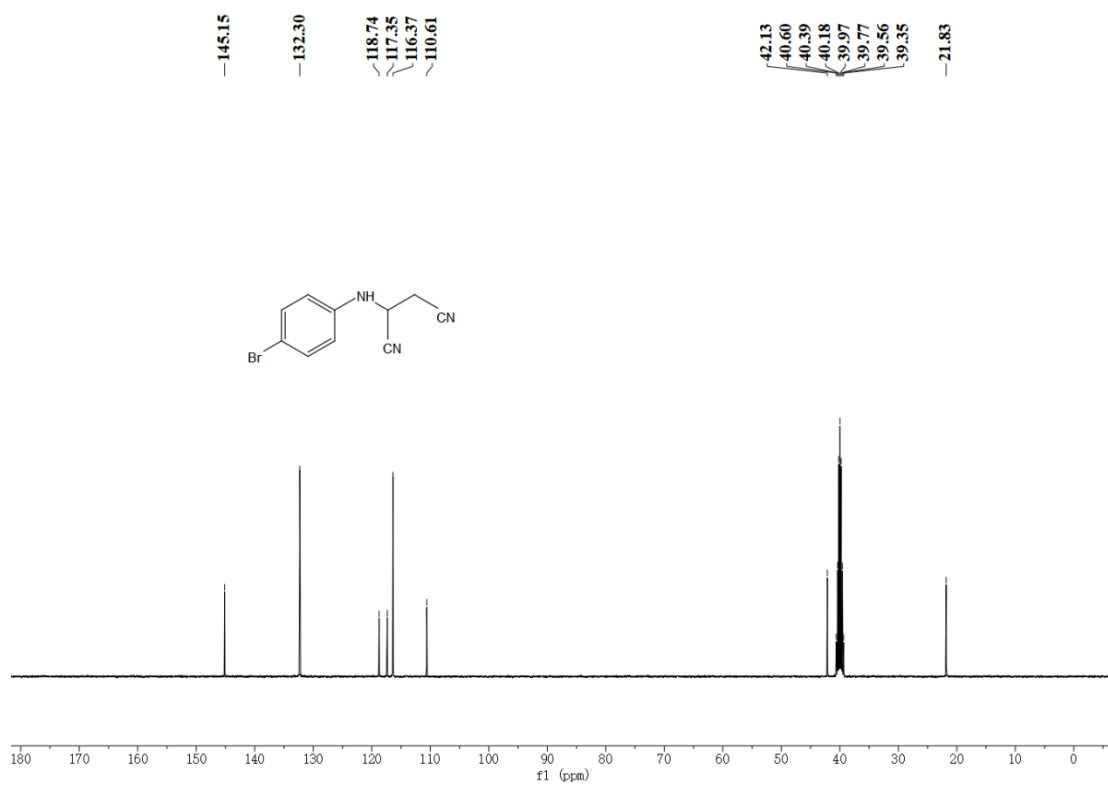

$^1\text{H}$  NMR (400 MHz,  $\text{DMSO-}d_6$ ) and  $^{13}\text{C}$  NMR (100 MHz,  $\text{DMSO-}d_6$ ) for **3h**

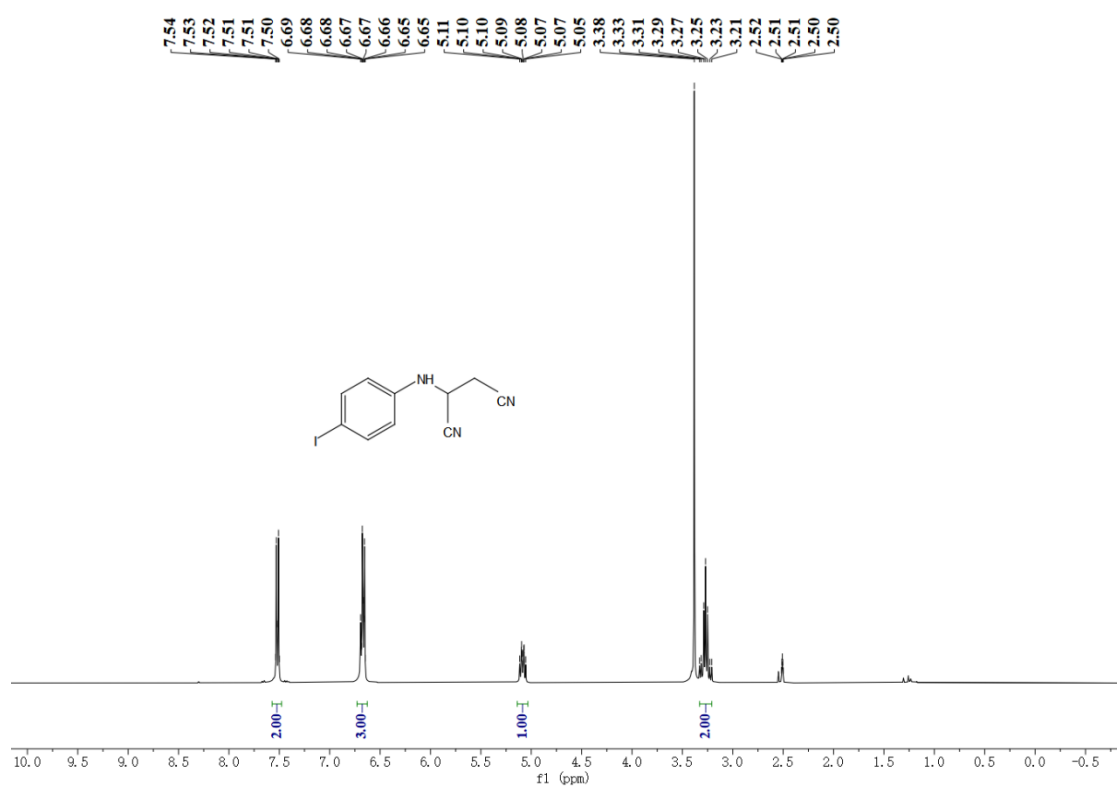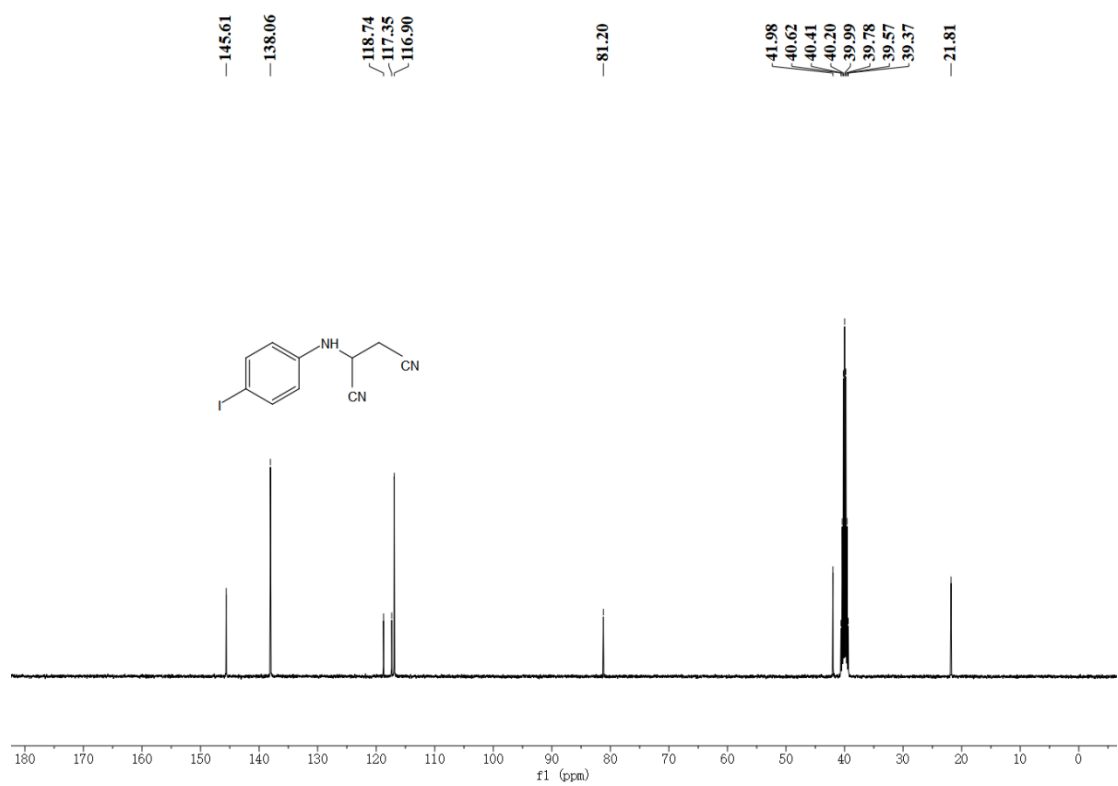

$^1\text{H}$  NMR (400 MHz,  $\text{DMSO-}d_6$ ) and  $^{13}\text{C}$  NMR (100 MHz,  $\text{DMSO-}d_6$ ) for **3j**

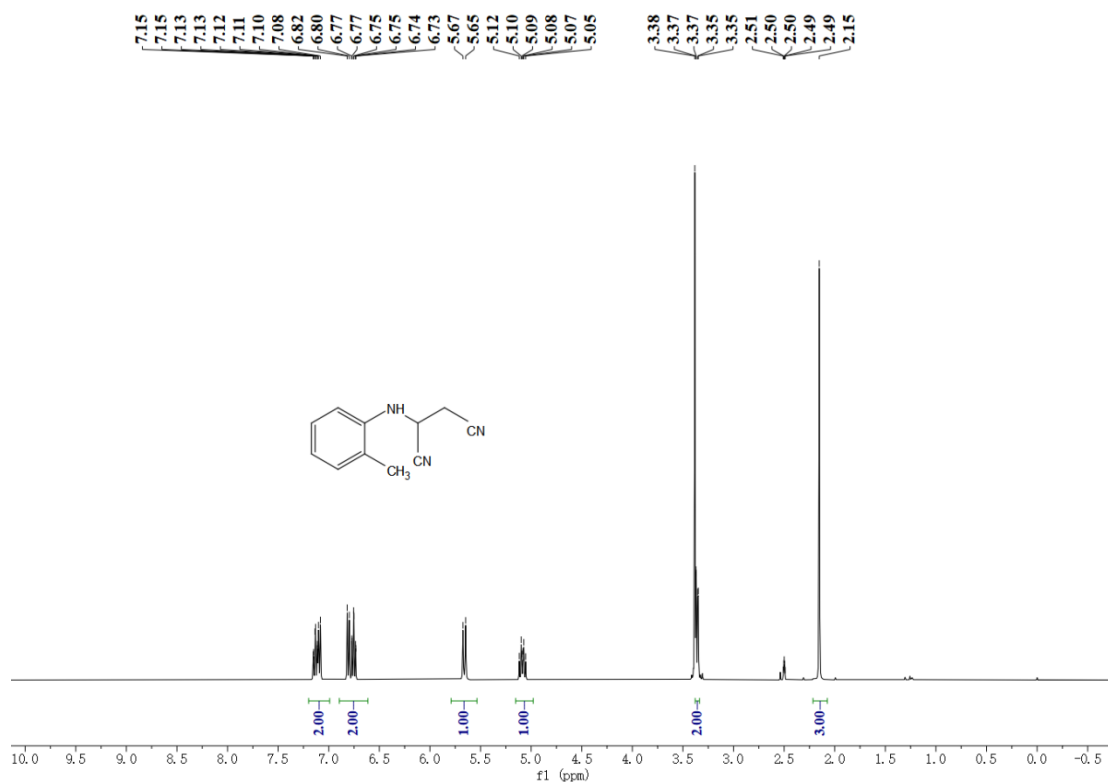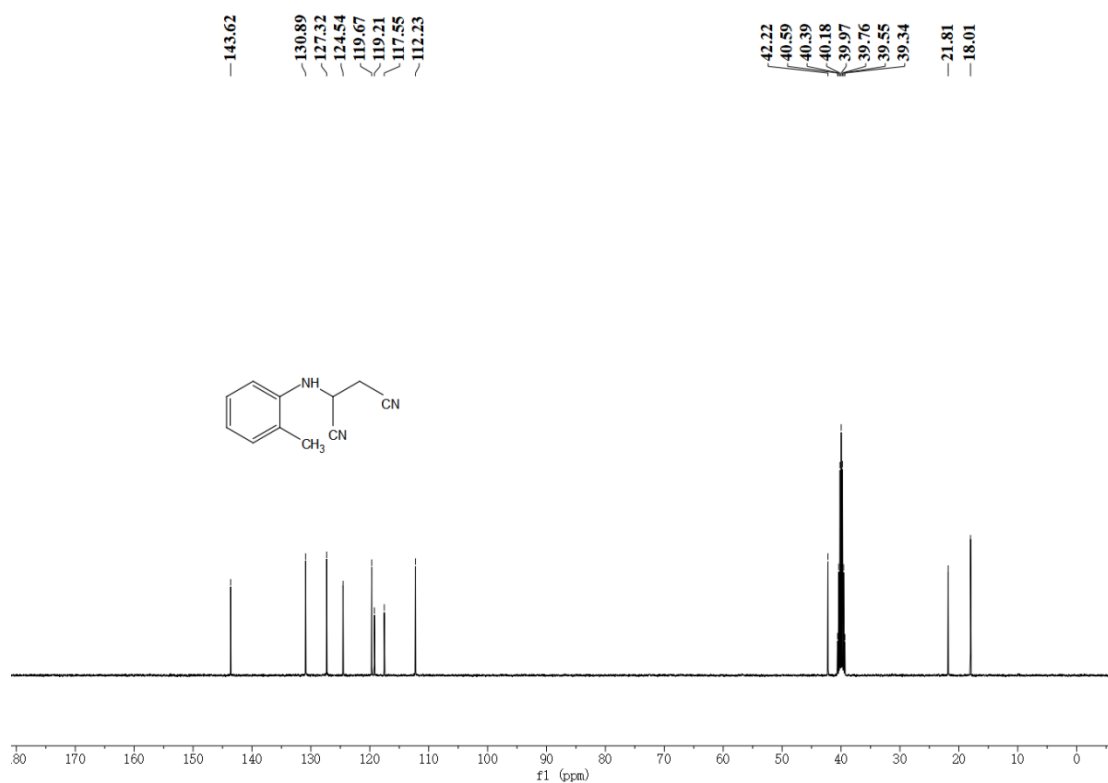

$^1\text{H}$  NMR (400 MHz,  $\text{DMSO}-d_6$ ) and  $^{13}\text{C}$  NMR (100 MHz,  $\text{DMSO}-d_6$ ) for **3k**

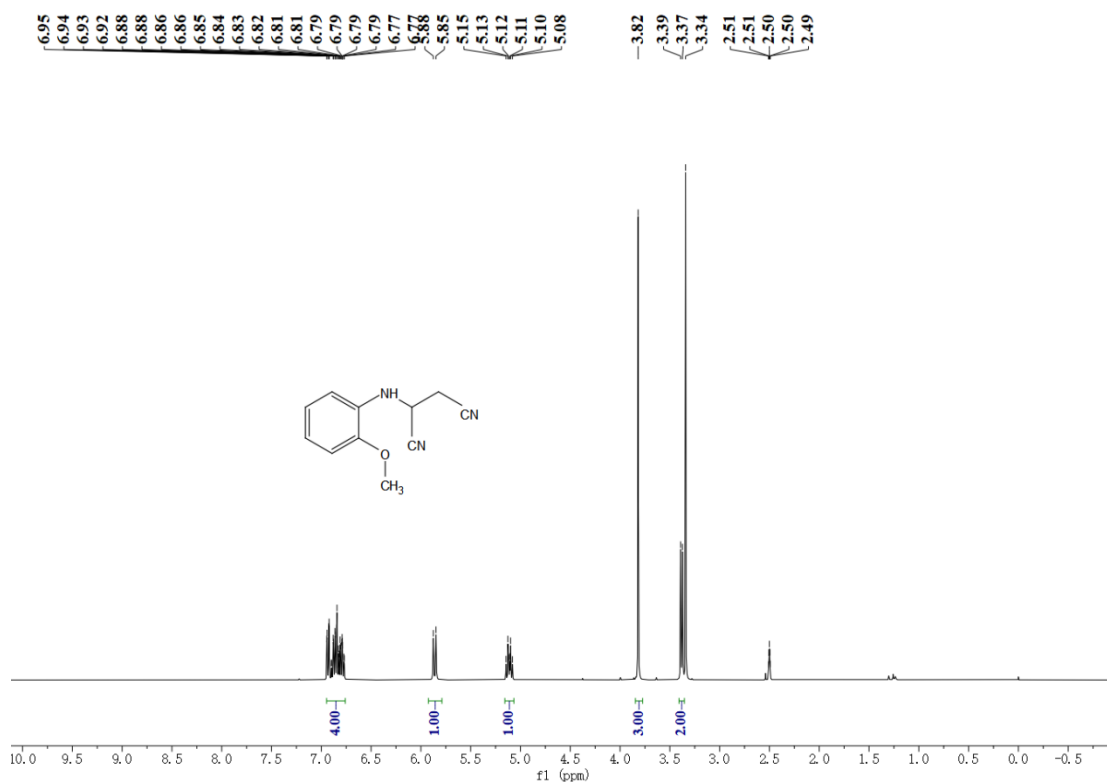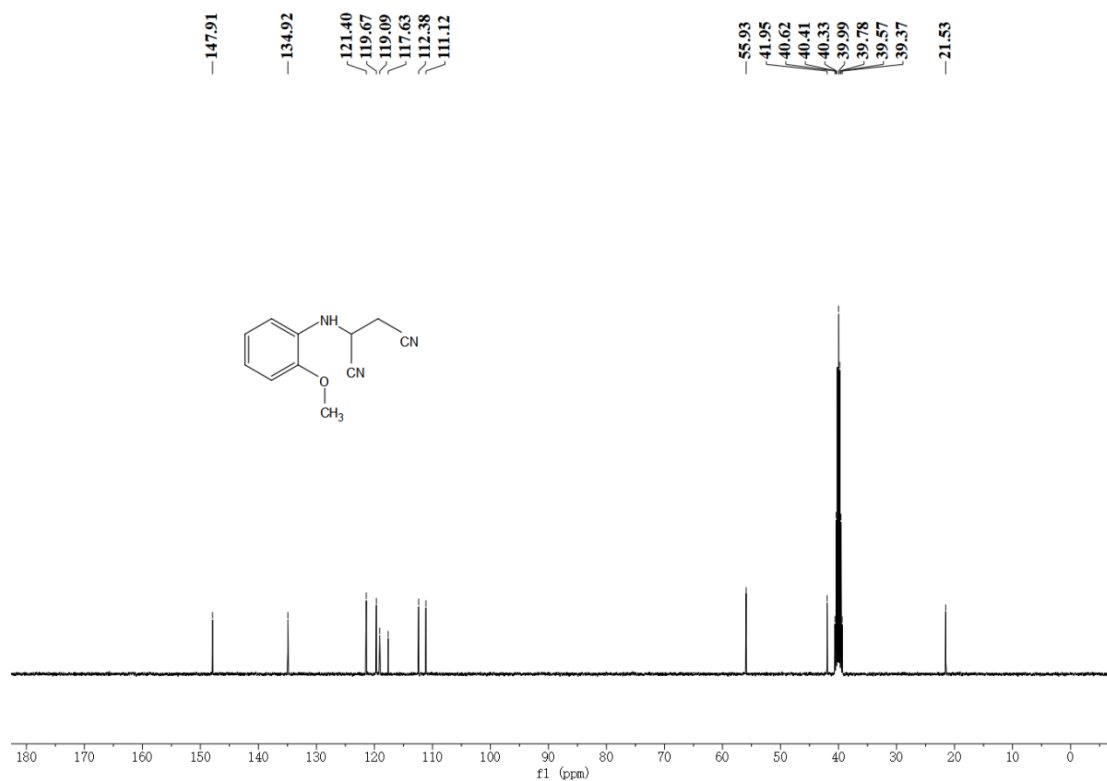

$^1\text{H}$  NMR (400 MHz,  $\text{DMSO-}d_6$ ),  $^{13}\text{C}$  NMR (100 MHz,  $\text{DMSO-}d_6$ ) and  $^{19}\text{F}$  (376 MHz,  $\text{DMSO-}d_6$ )

for **31**

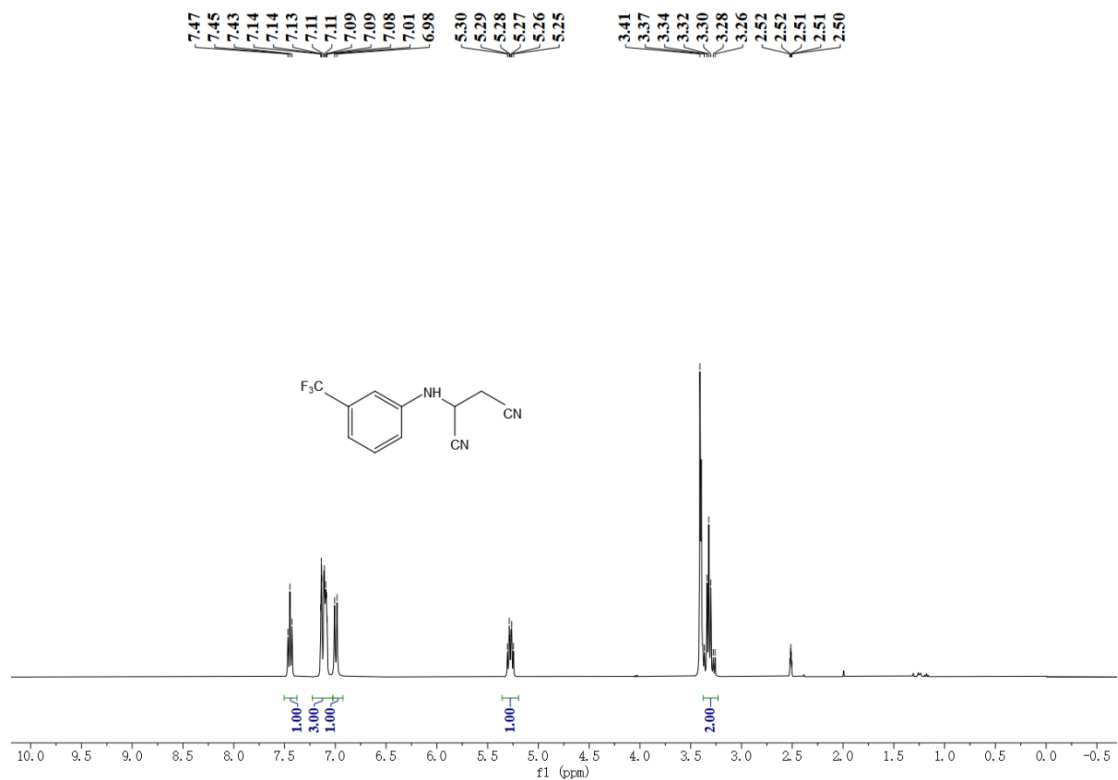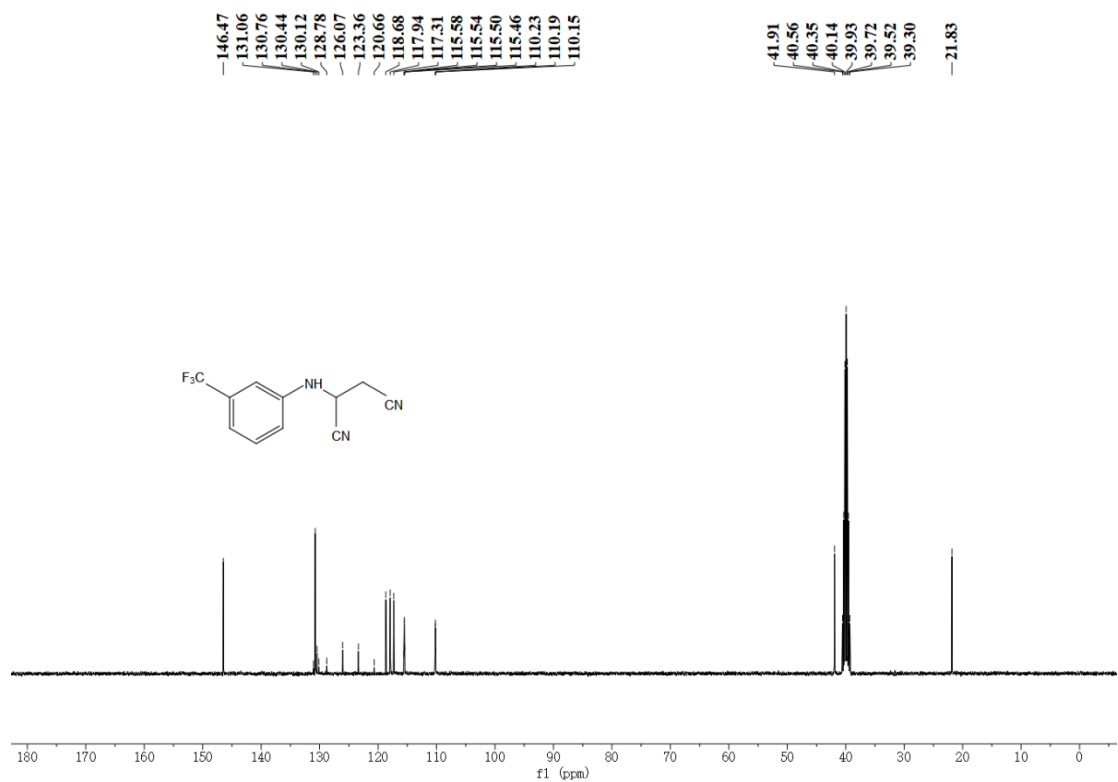

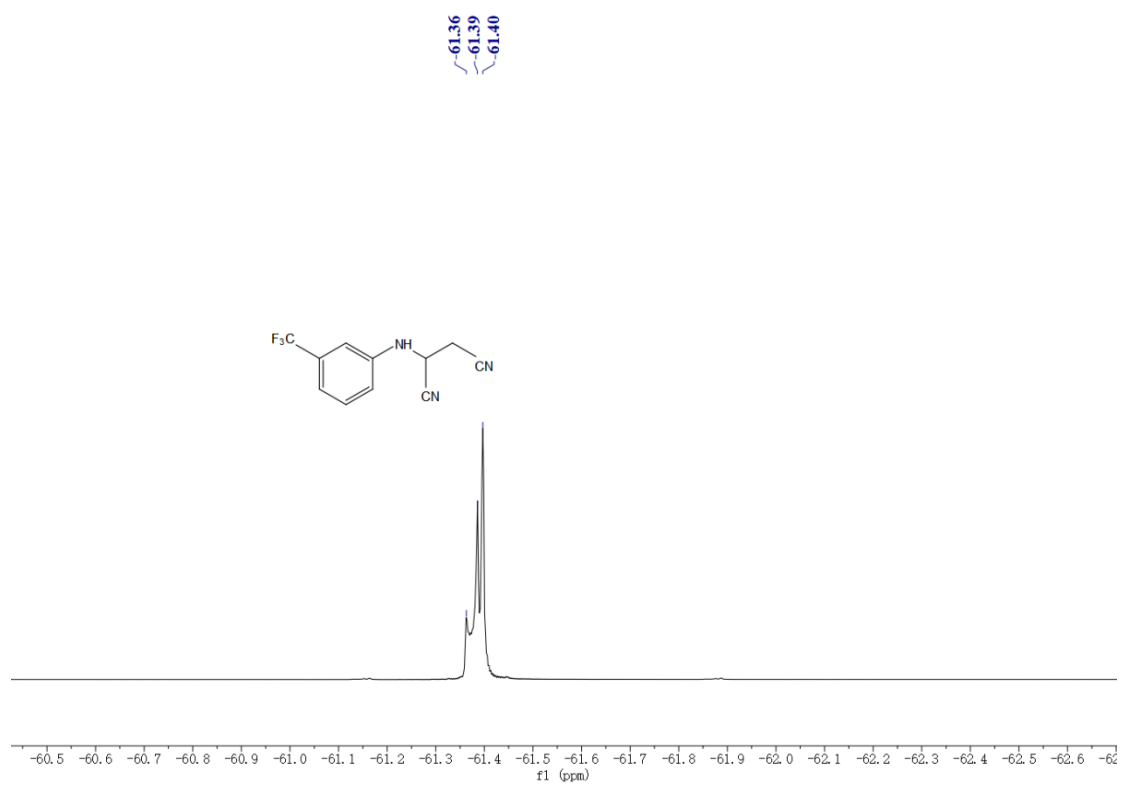



$^1\text{H}$  NMR (400 MHz,  $\text{DMSO}-d_6$ ),  $^{13}\text{C}$  NMR (100 MHz,  $\text{DMSO}-d_6$ ) and  $^{19}\text{F}$  (376 MHz,  $\text{DMSO}-d_6$ )

for **3m**

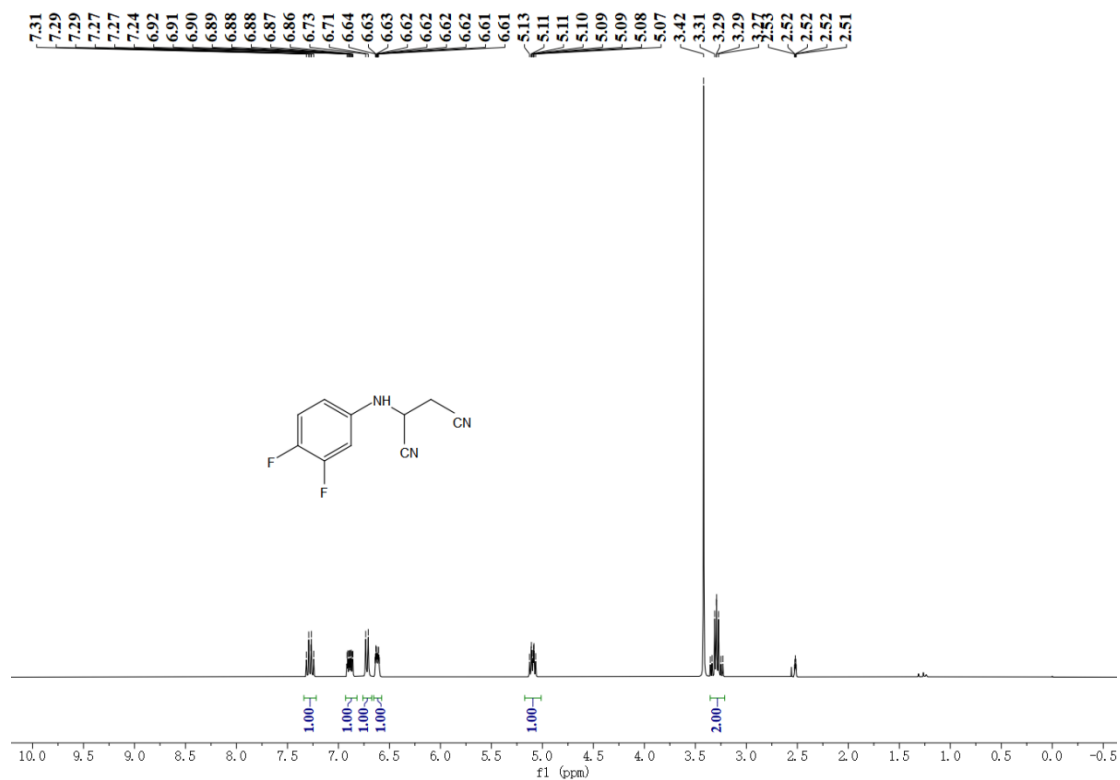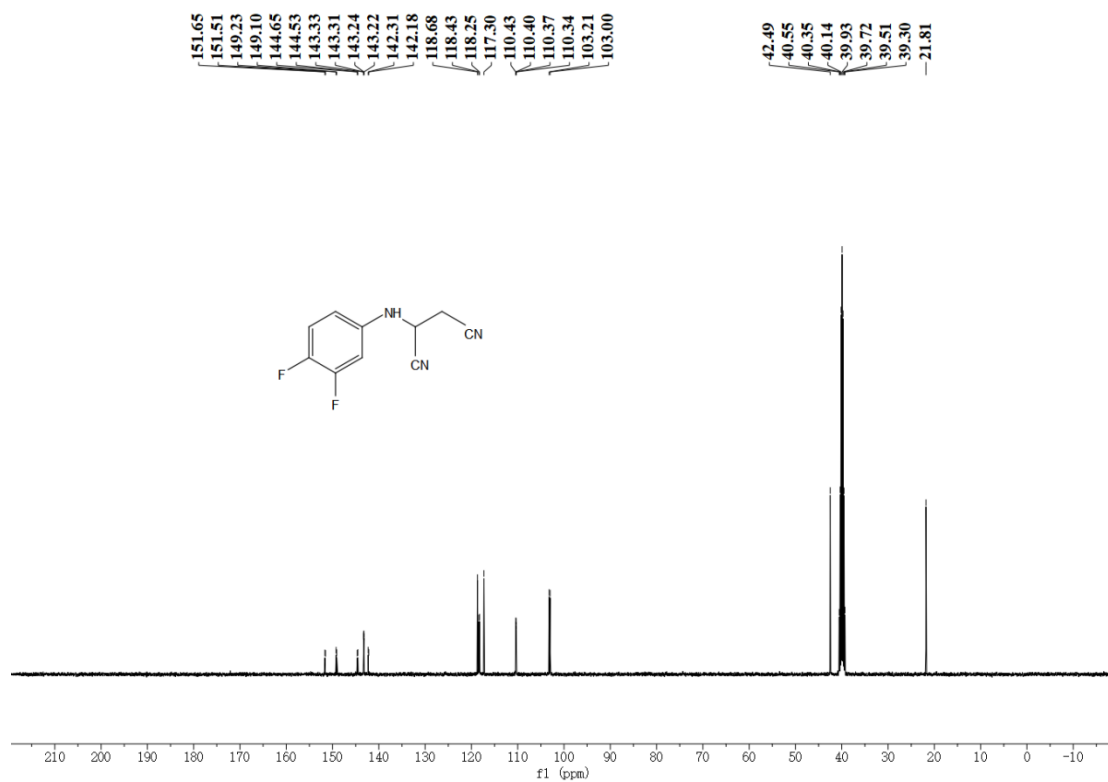

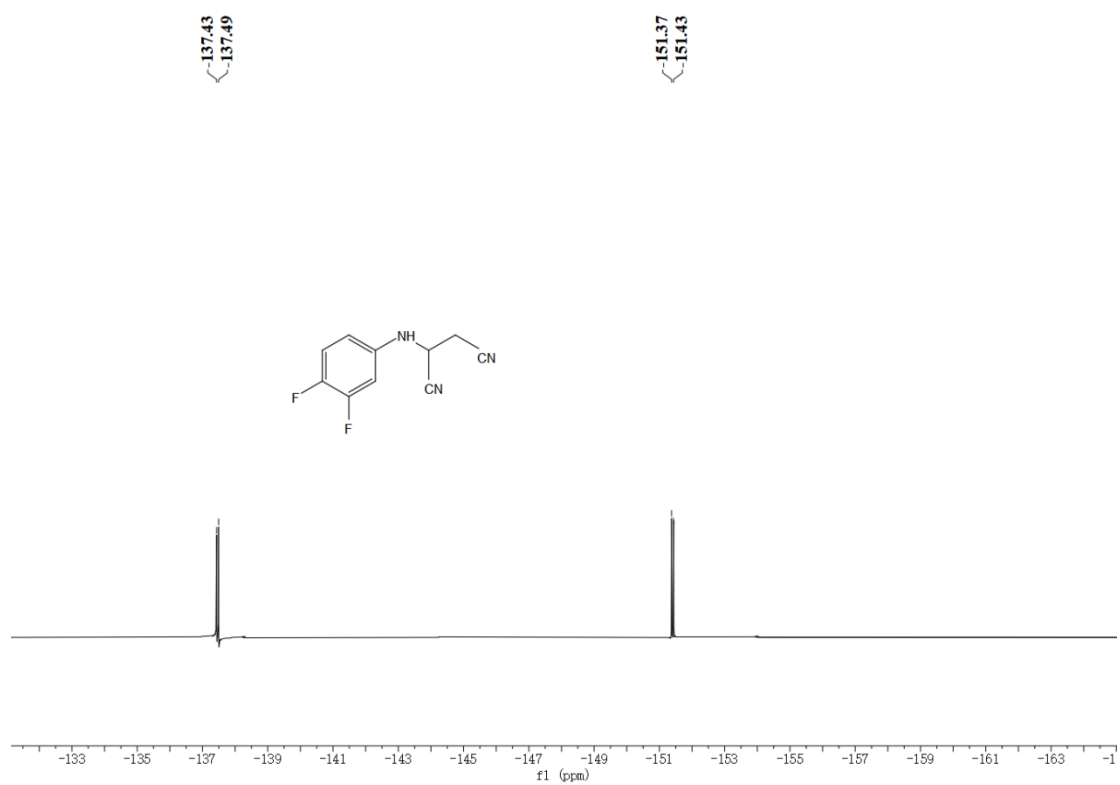

$^1\text{H}$  NMR (400 MHz,  $\text{DMSO-}d_6$ ) and  $^{13}\text{C}$  NMR (100 MHz,  $\text{DMSO-}d_6$ ) for **3n**

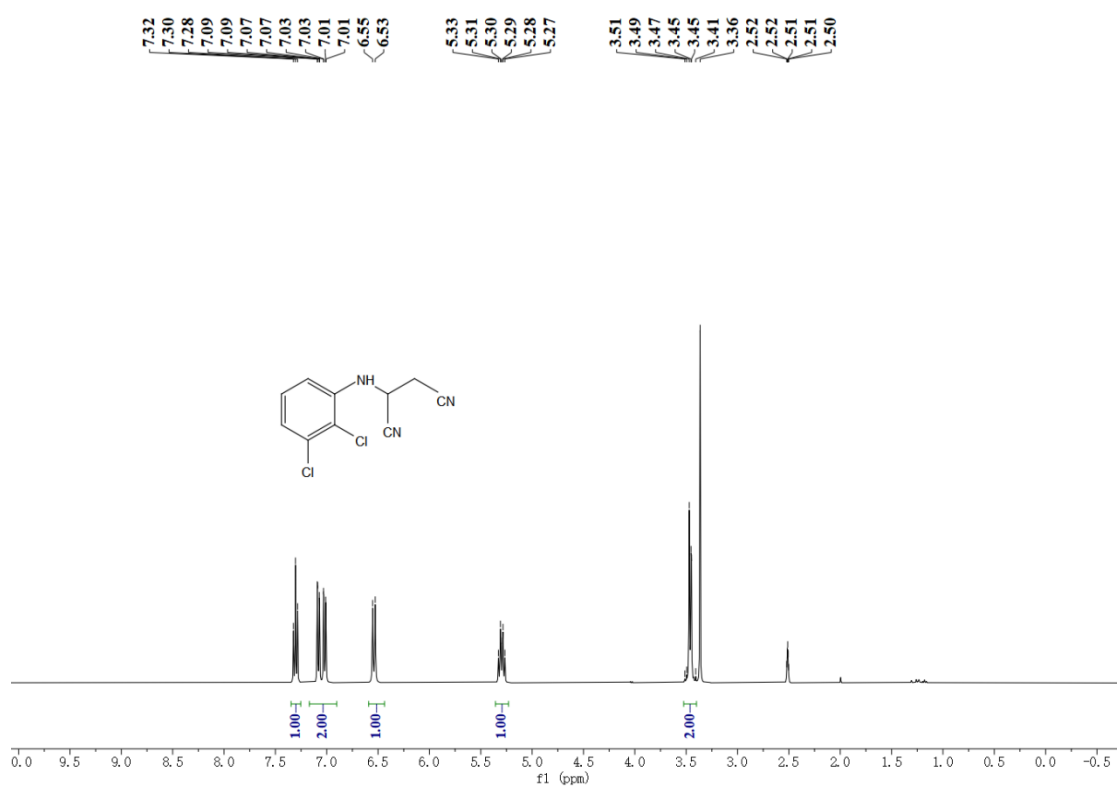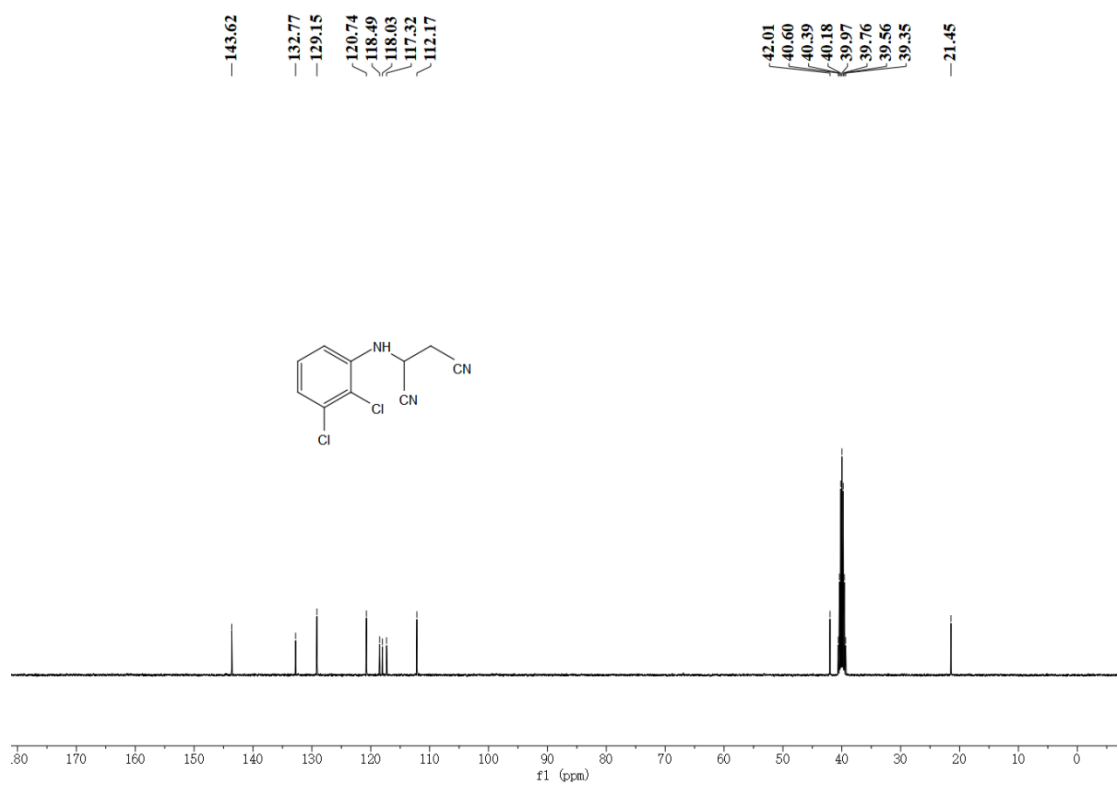

$^1\text{H}$  NMR (400 MHz,  $\text{DMSO-}d_6$ ) and  $^{13}\text{C}$  NMR (100 MHz,  $\text{DMSO-}d_6$ ) for **3o**

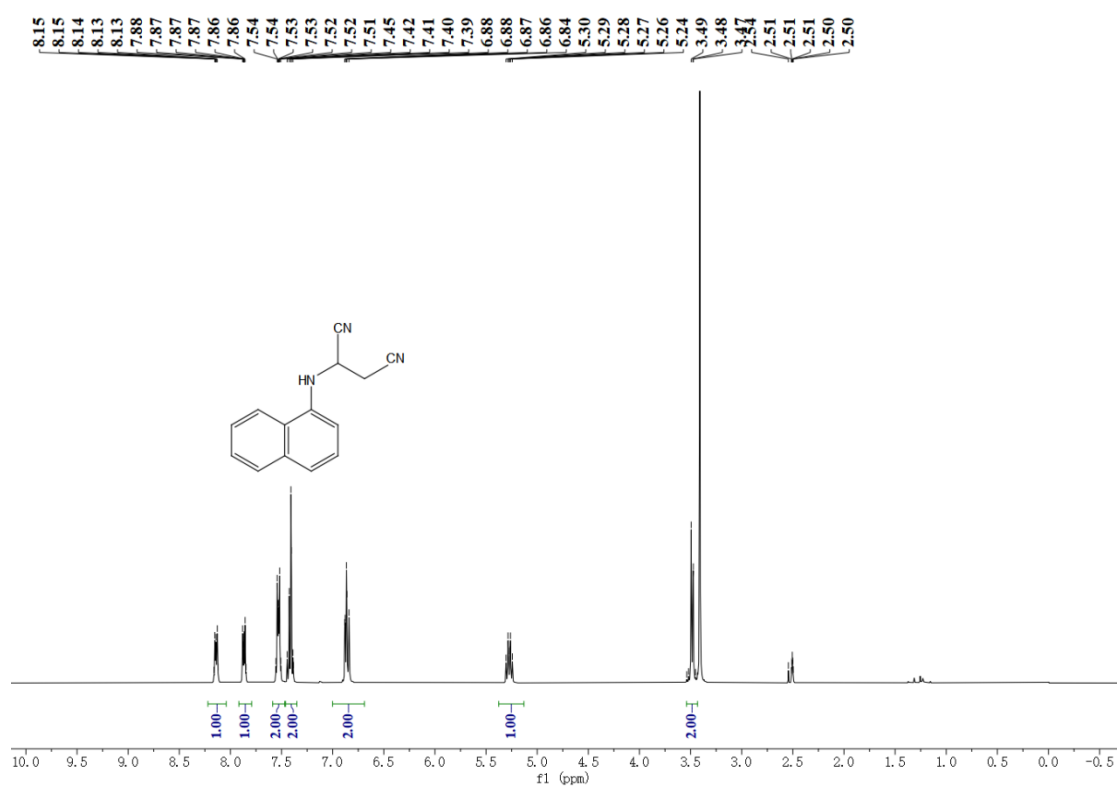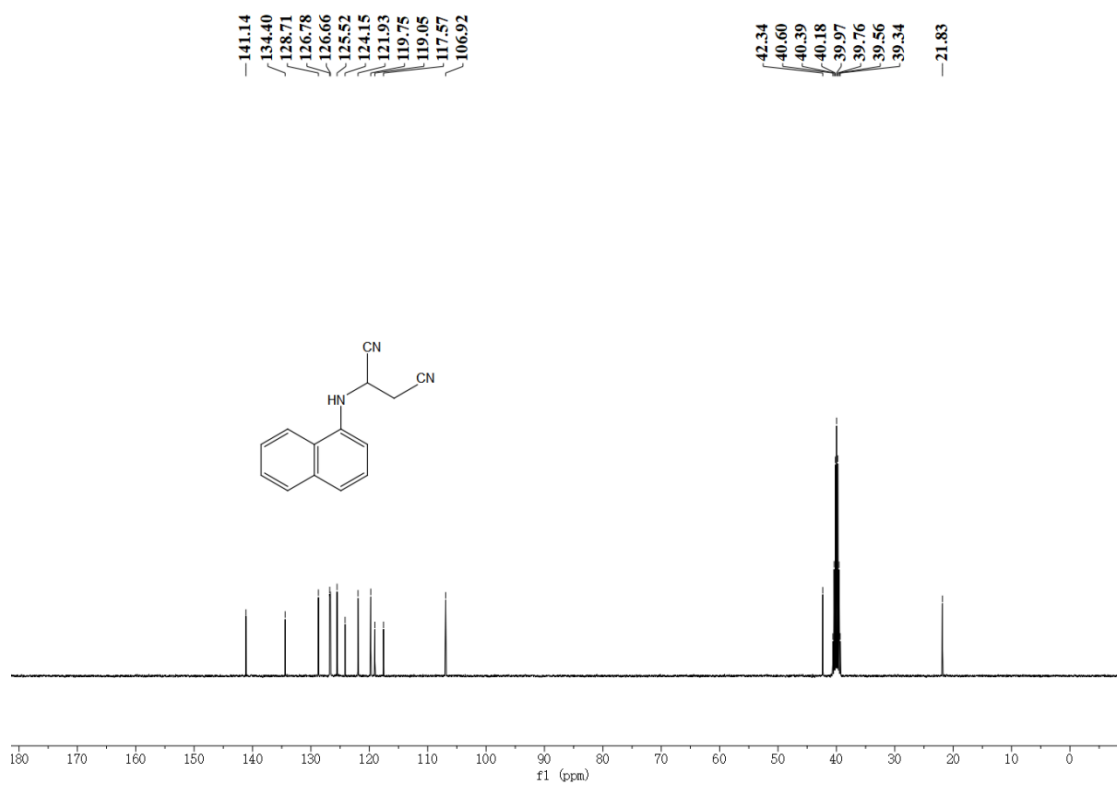

$^1\text{H}$  NMR (500 MHz,  $\text{CDCl}_3$ ) and  $^{13}\text{C}$  NMR (126 MHz,  $\text{CDCl}_3$ ) for **3p**

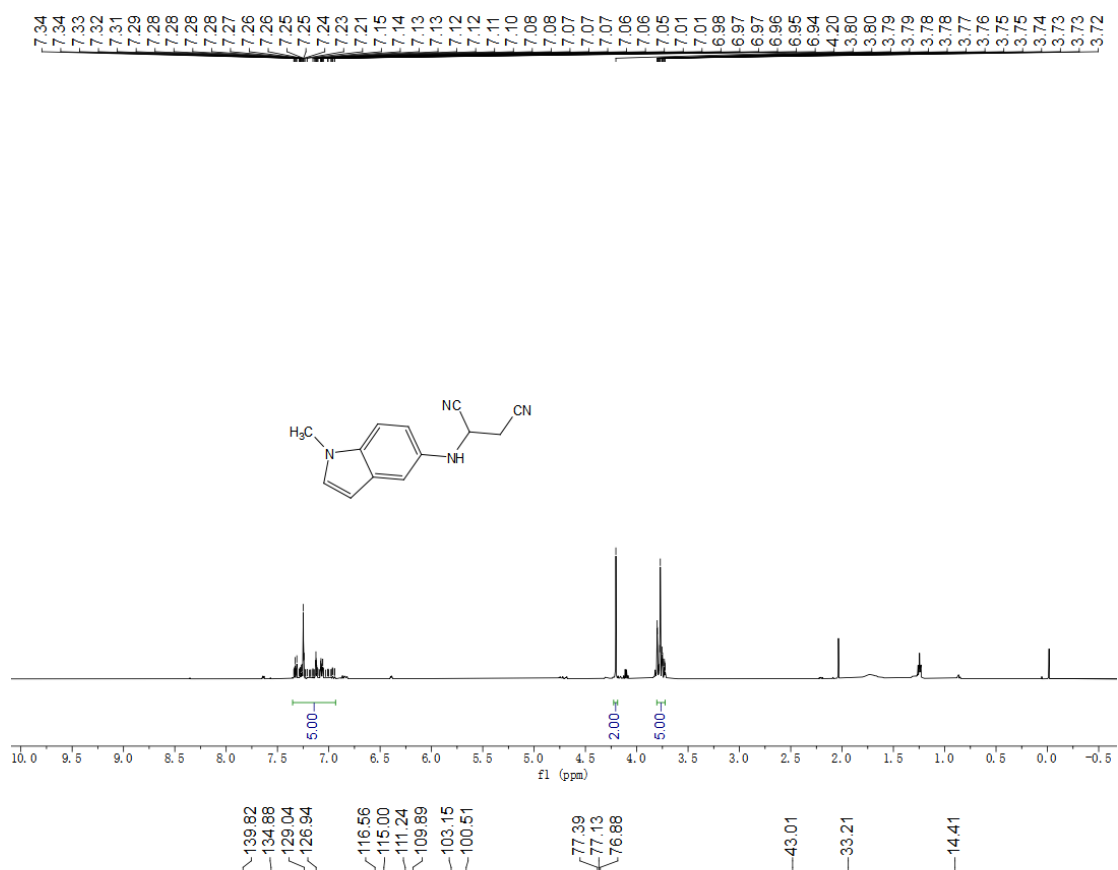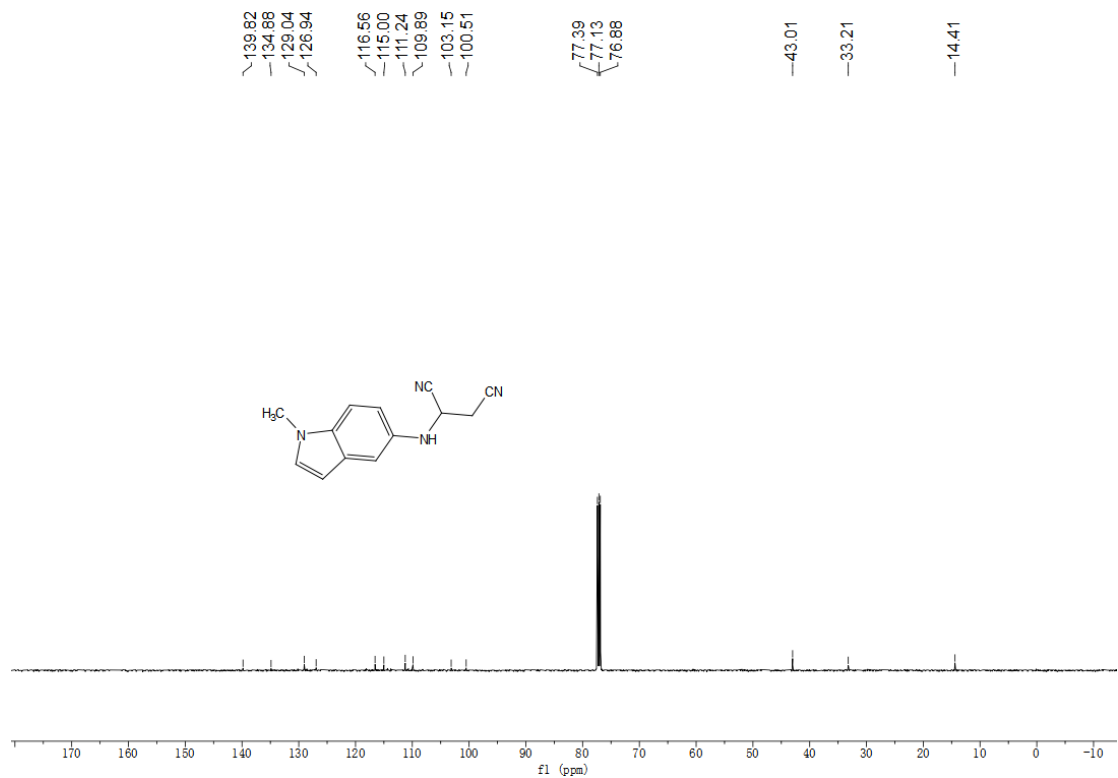

$^1\text{H}$  NMR (400 MHz,  $\text{CDCl}_3$ ) and  $^{13}\text{C}$  NMR (100 MHz,  $\text{CDCl}_3$ ) for **3q**

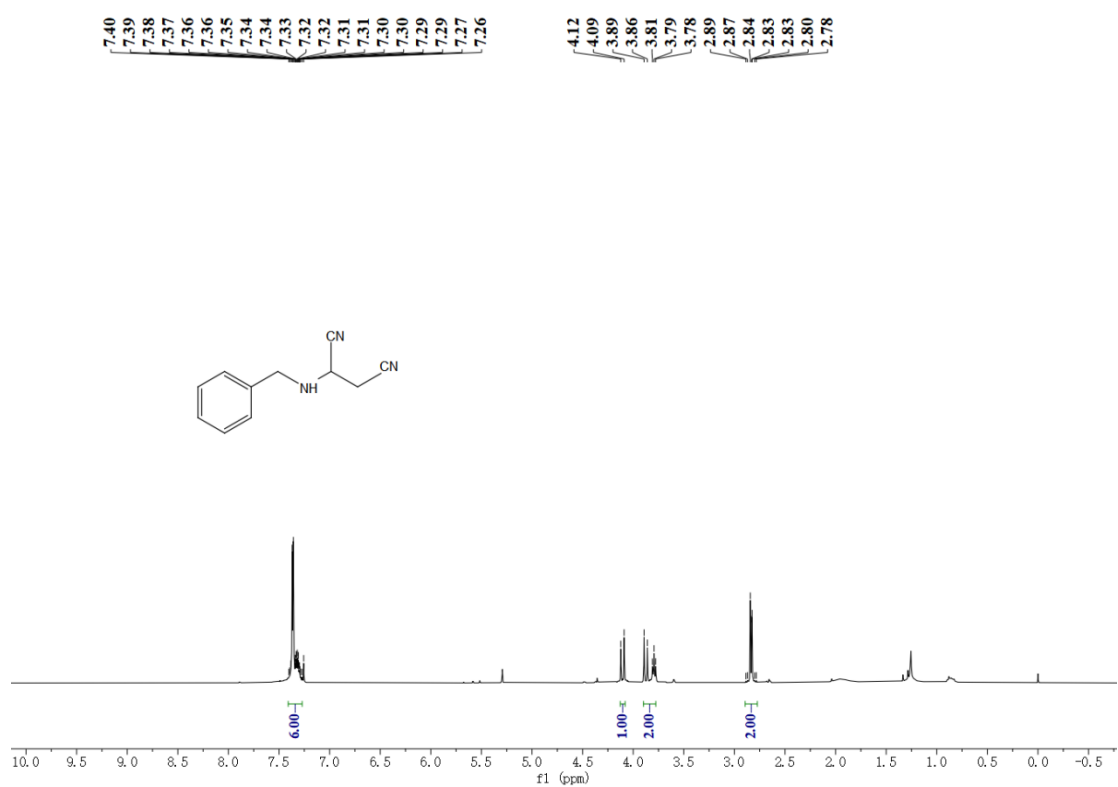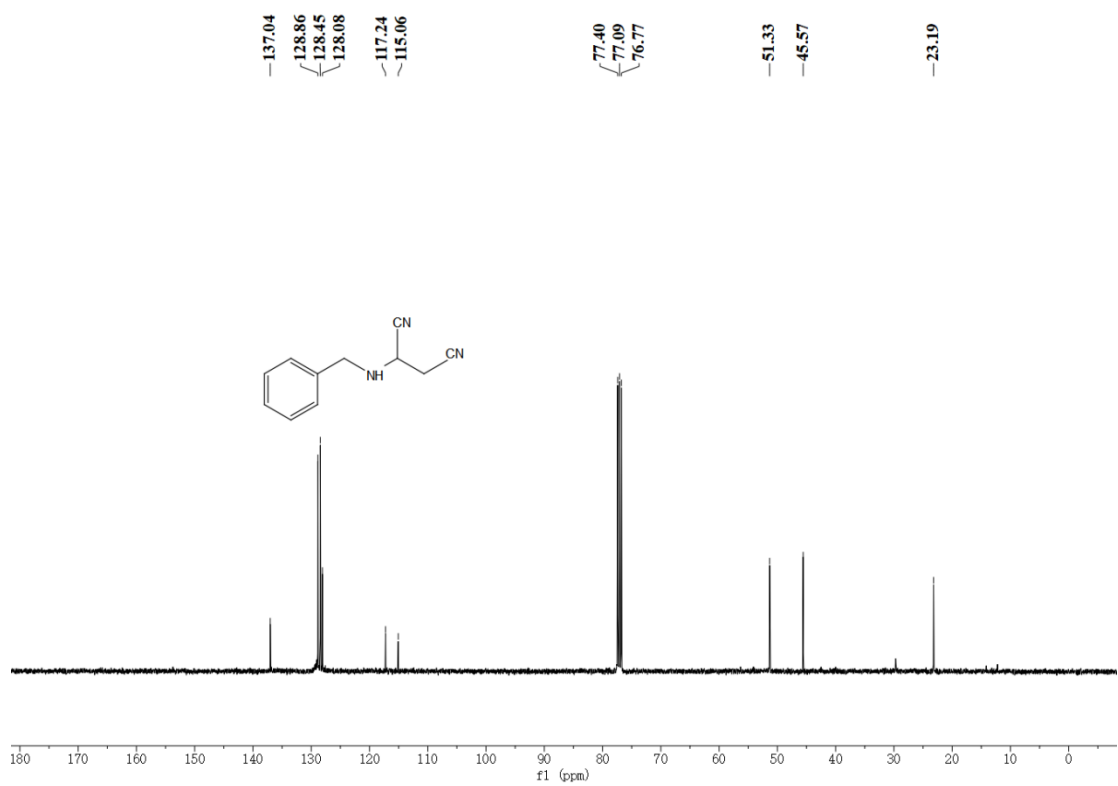

$^1\text{H}$  NMR (400 MHz,  $\text{CDCl}_3$ ) and  $^{13}\text{C}$  NMR (100 MHz,  $\text{CDCl}_3$ ) for **3r**

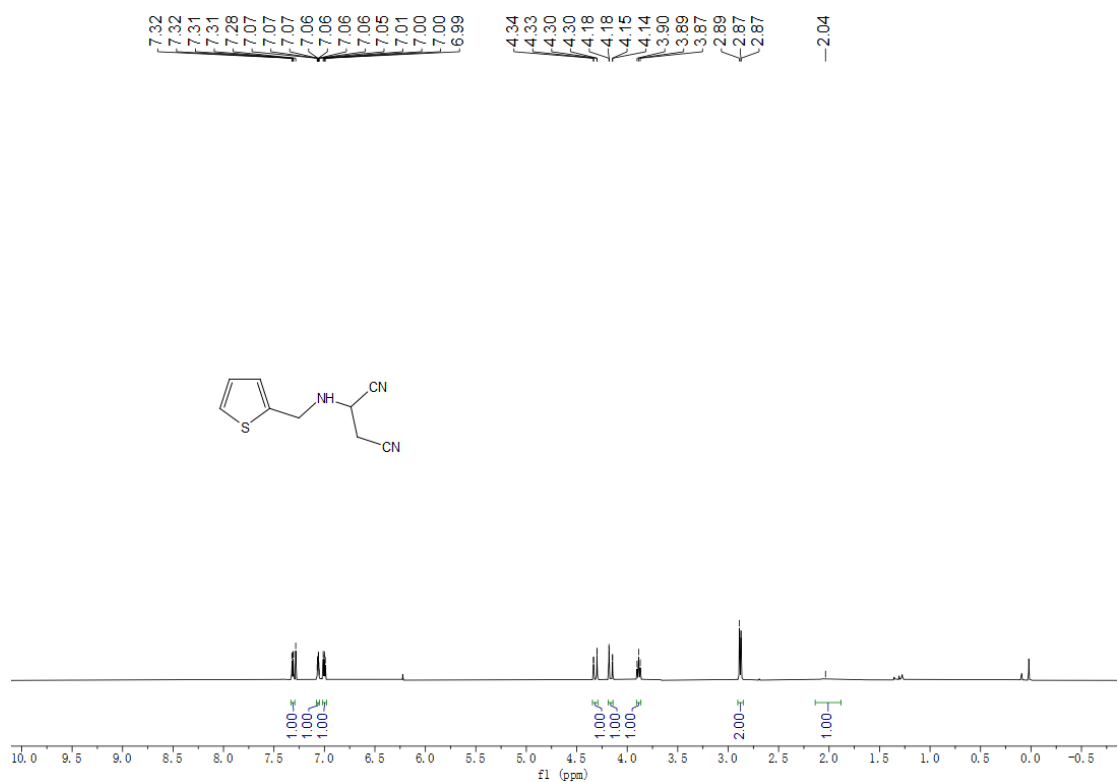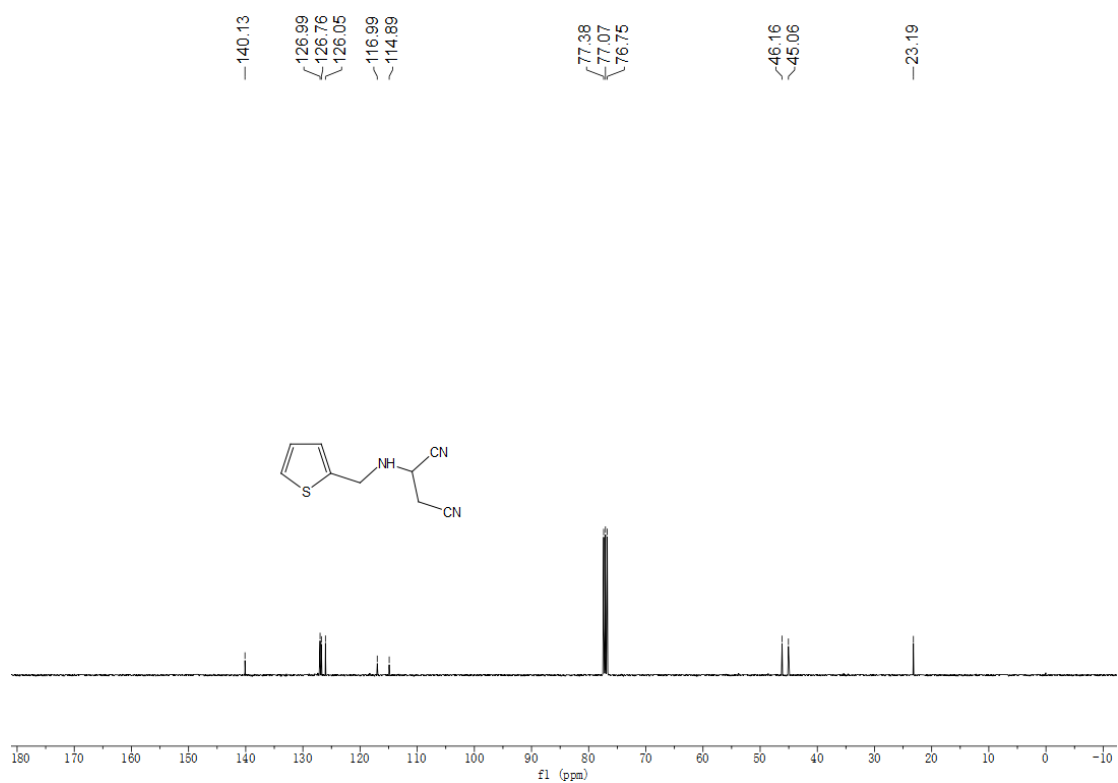

$^1\text{H}$  NMR (400 MHz,  $\text{CDCl}_3$ ) and  $^{13}\text{C}$  NMR (100 MHz,  $\text{CDCl}_3$ ) for **3s**

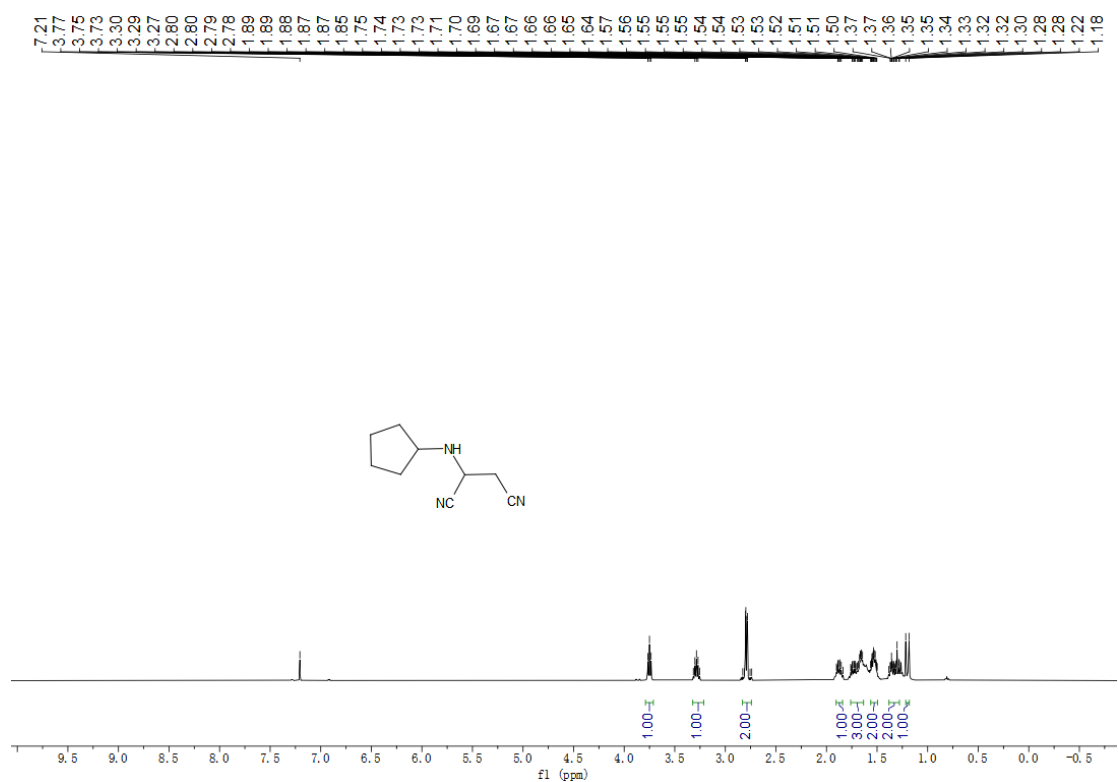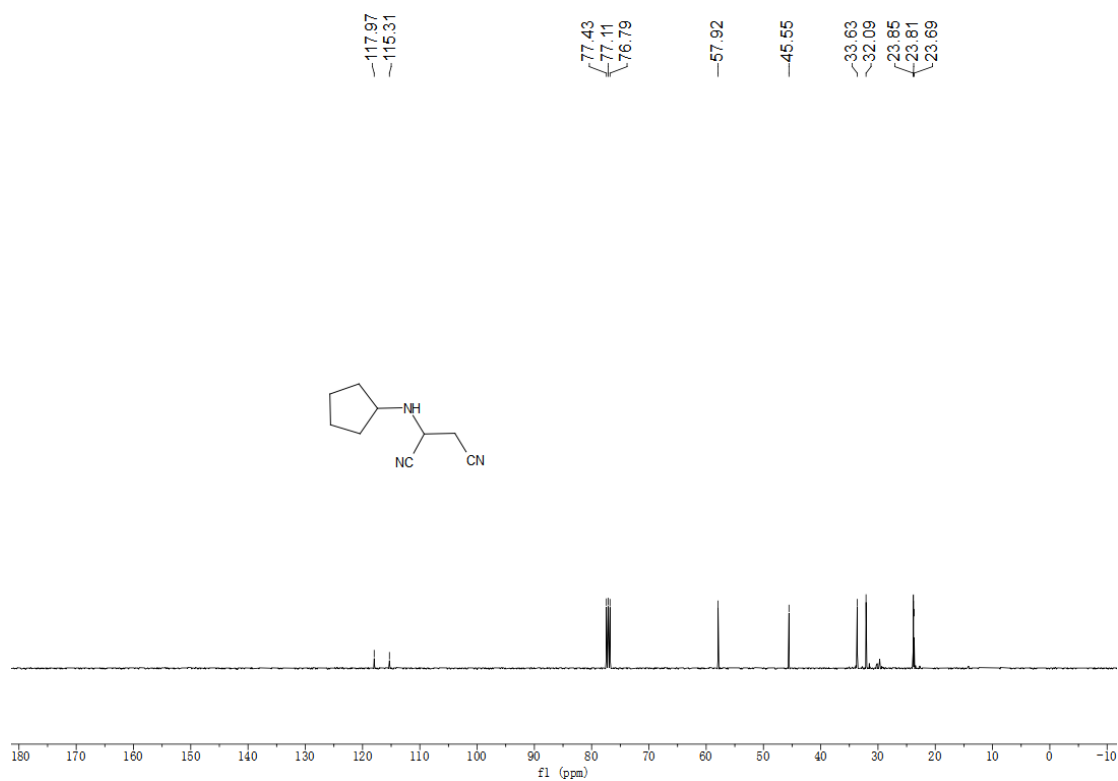



$^1\text{H}$  NMR (400 MHz,  $\text{CDCl}_3$ ) and  $^{13}\text{C}$  NMR (100 MHz,  $\text{CDCl}_3$ ) for **5a**

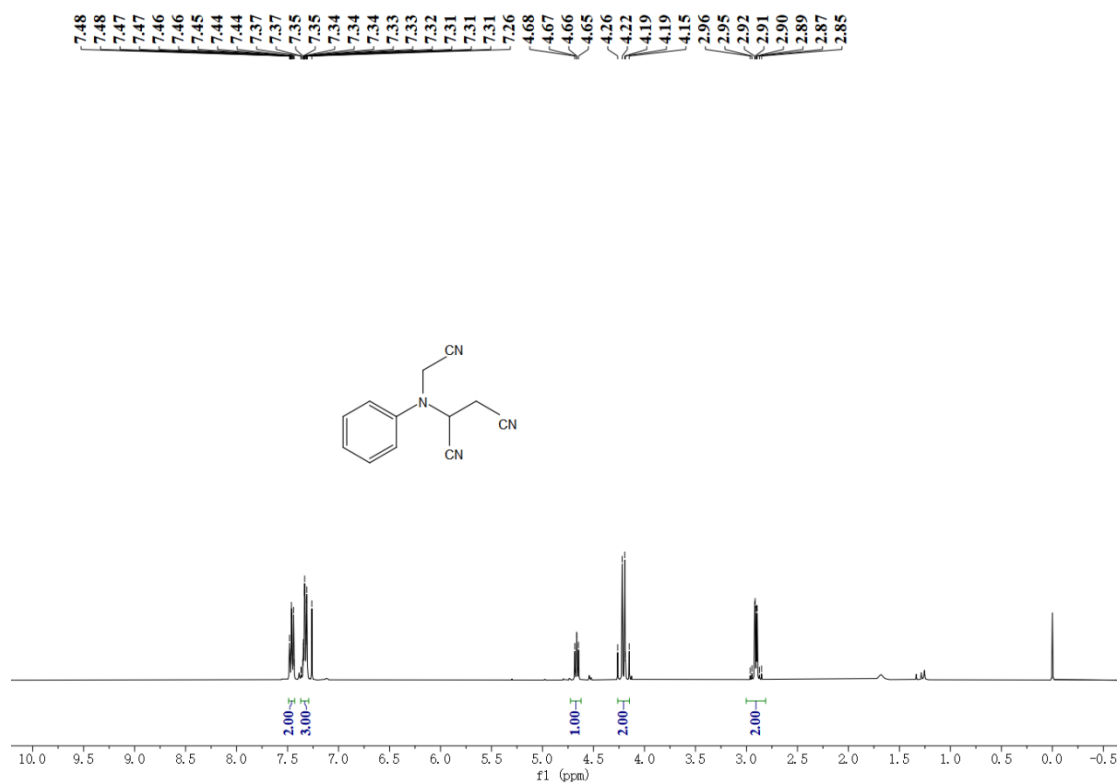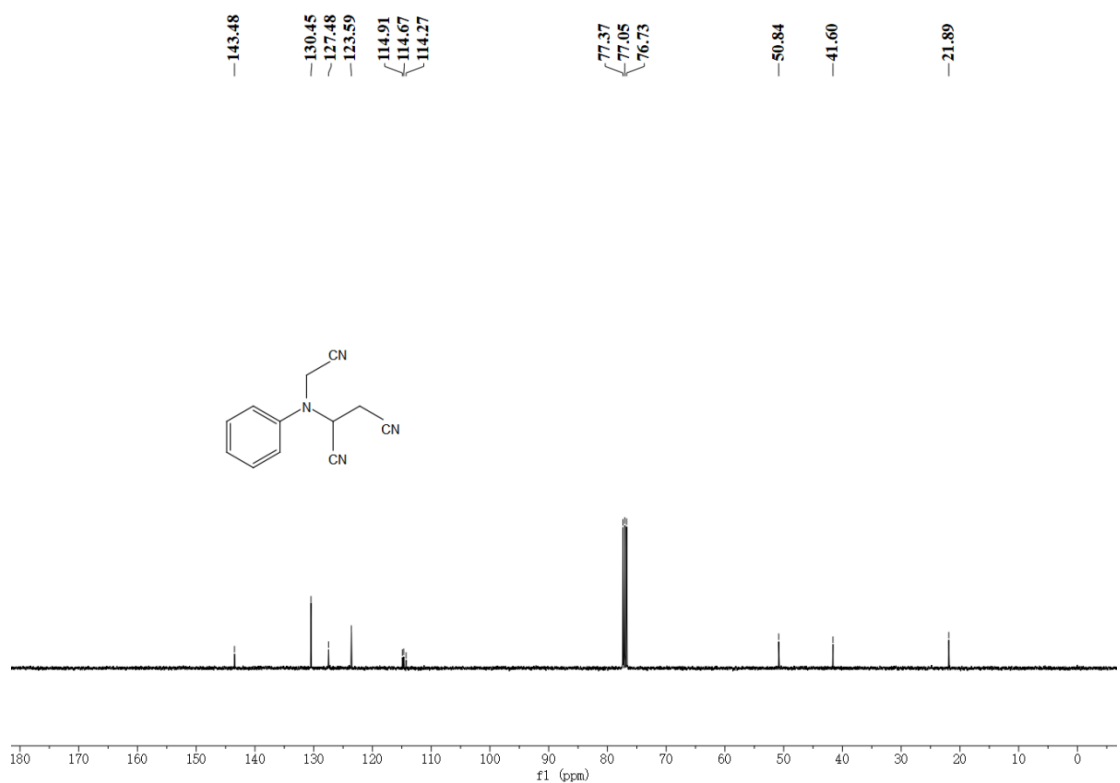

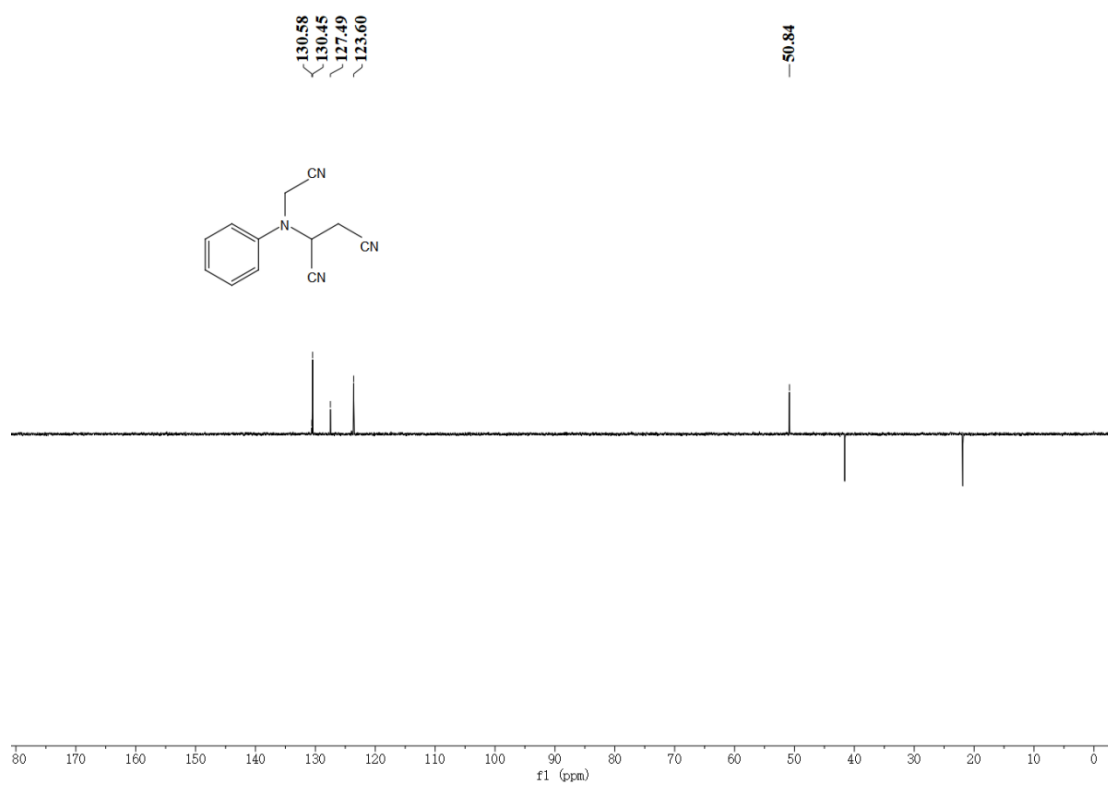

$^1\text{H}$  NMR (400 MHz,  $\text{DMSO-}d_6$ ) and  $^{13}\text{C}$  NMR (100 MHz,  $\text{DMSO-}d_6$ ) for **5b**

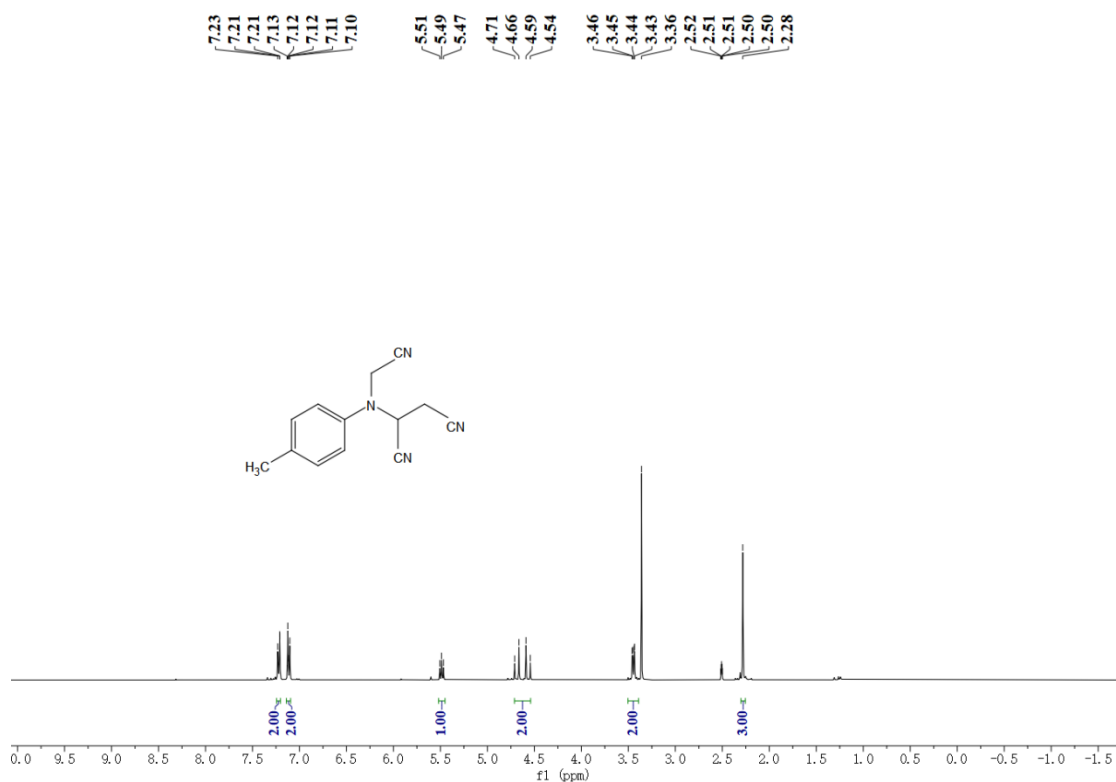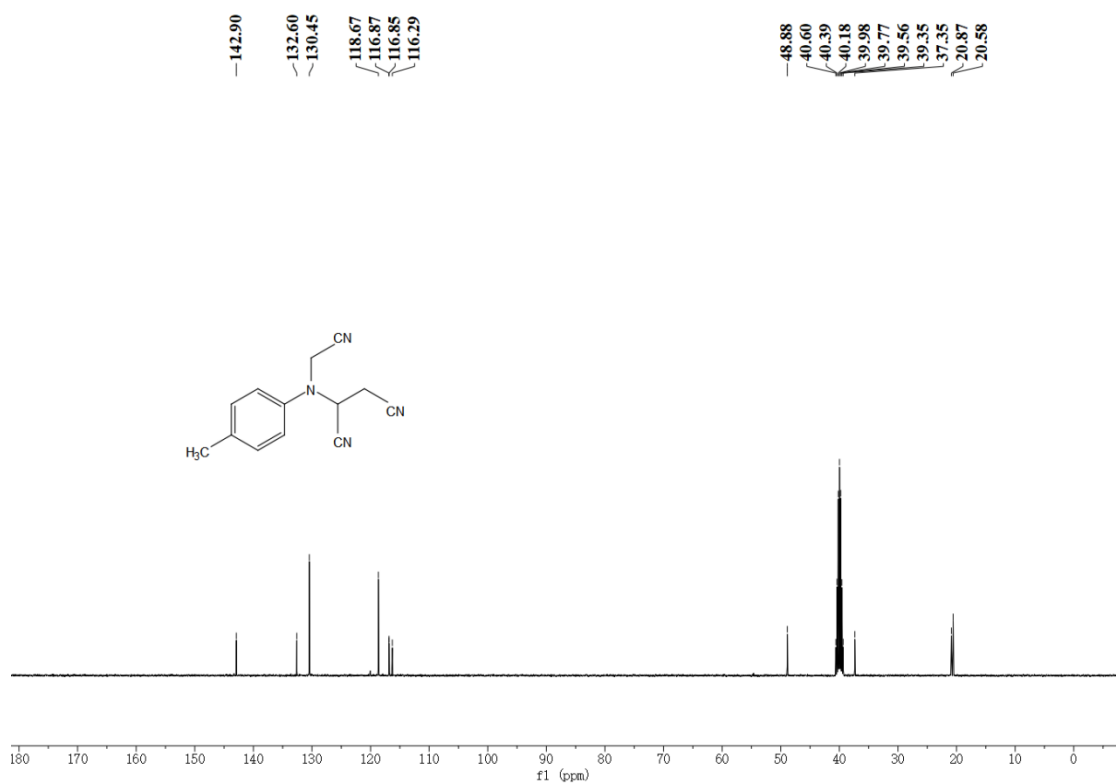

$^1\text{H}$  NMR (400 MHz,  $\text{CDCl}_3$ ) and  $^{13}\text{C}$  NMR (100 MHz,  $\text{CDCl}_3$ ) for **5c**

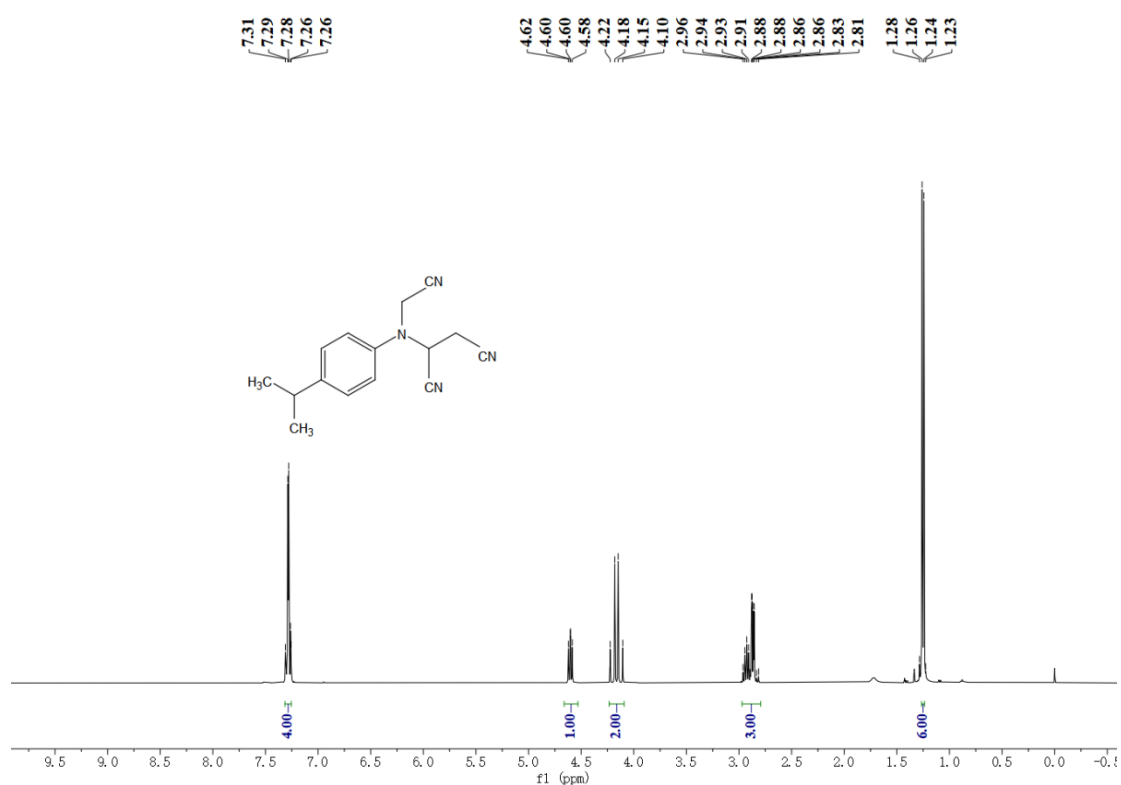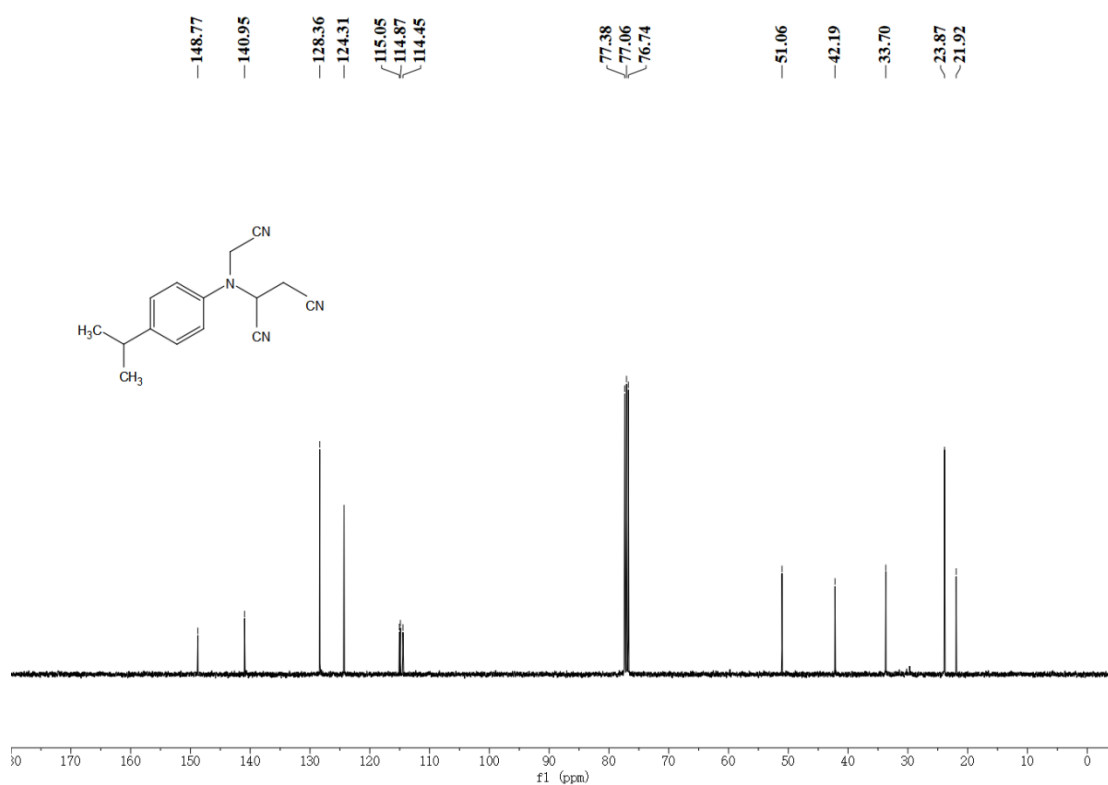

$^1\text{H}$  NMR (400 MHz,  $\text{CDCl}_3$ ) and  $^{13}\text{C}$  NMR (100 MHz,  $\text{CDCl}_3$ ) for **5d**

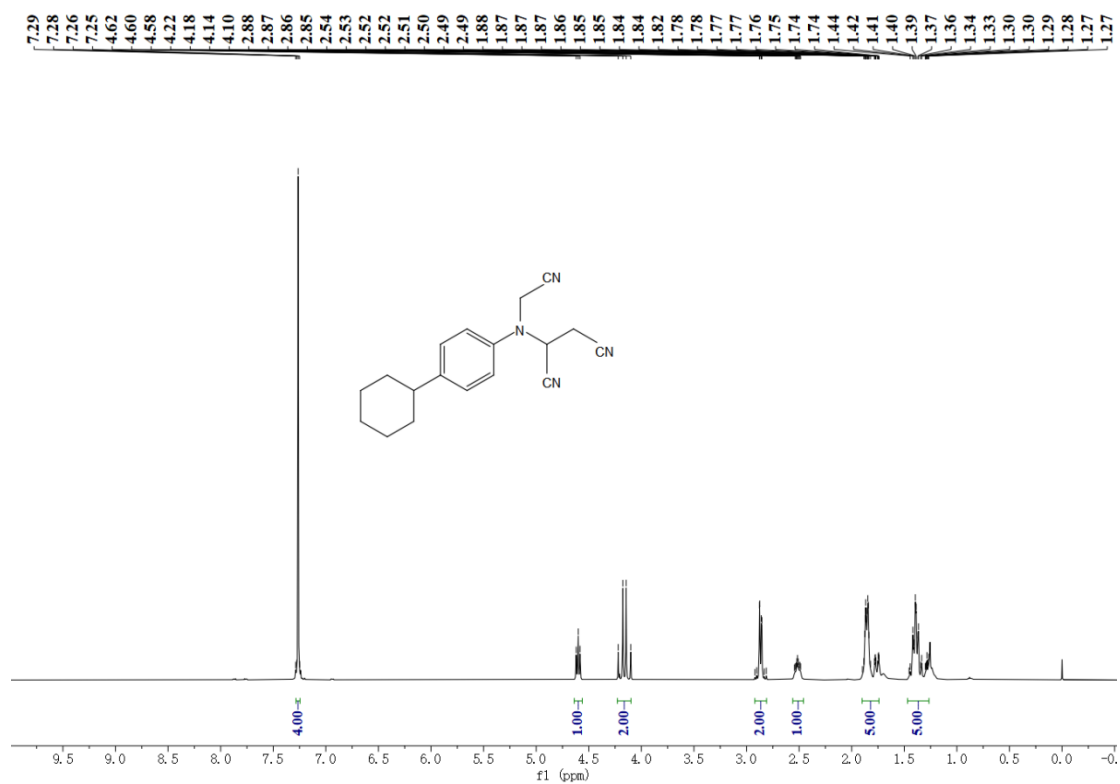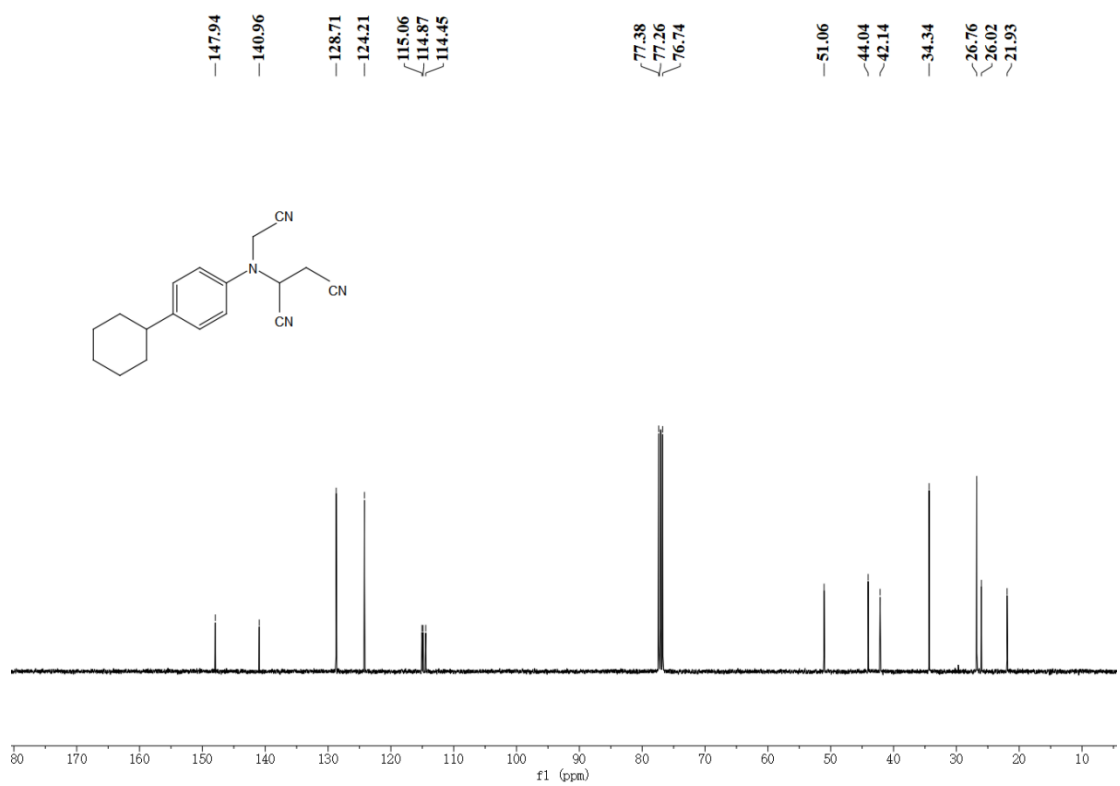

$^1\text{H}$  NMR (400 MHz,  $\text{DMSO-}d_6$ ),  $^{13}\text{C}$  NMR (100 MHz,  $\text{DMSO-}d_6$ ) and  $^{19}\text{F}$  NMR (376 MHz,  $\text{DMSO-}d_6$ ) spectra for **5e**

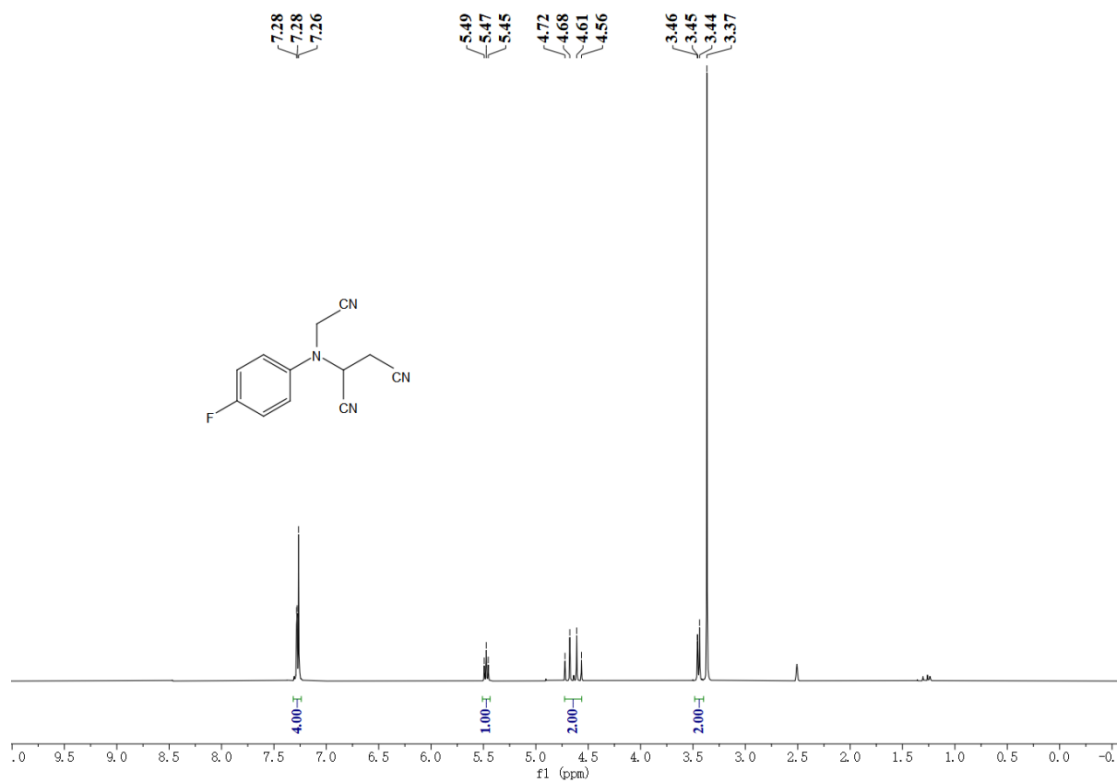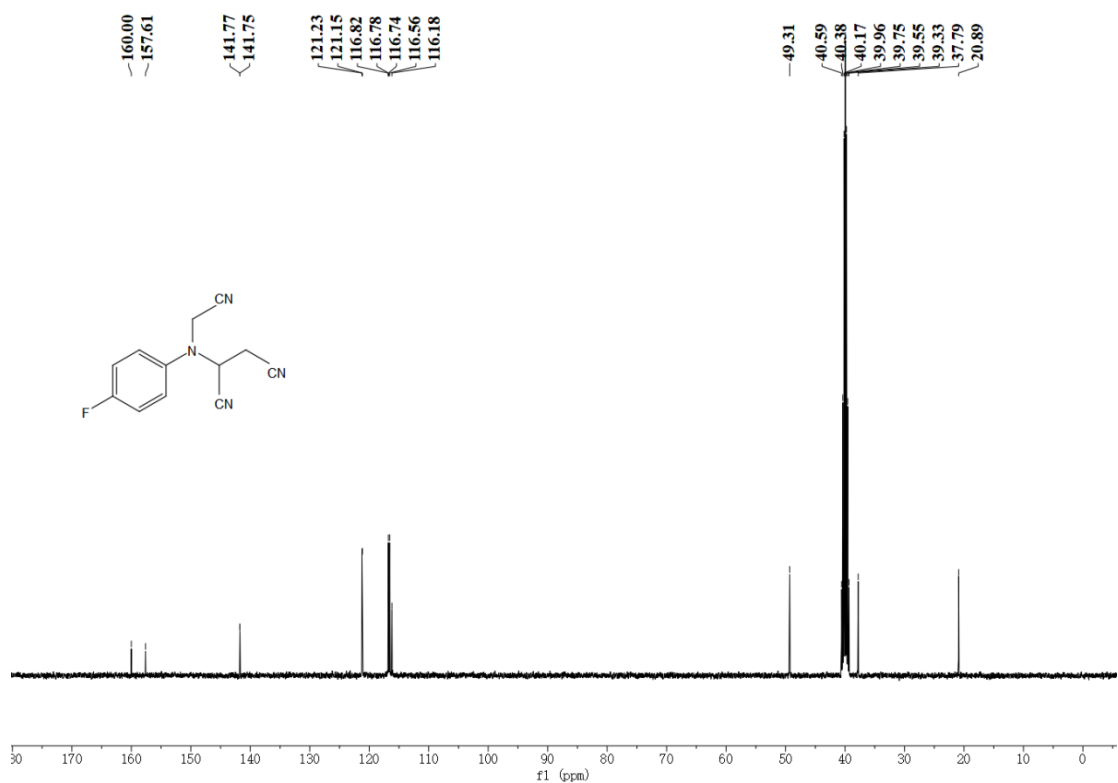

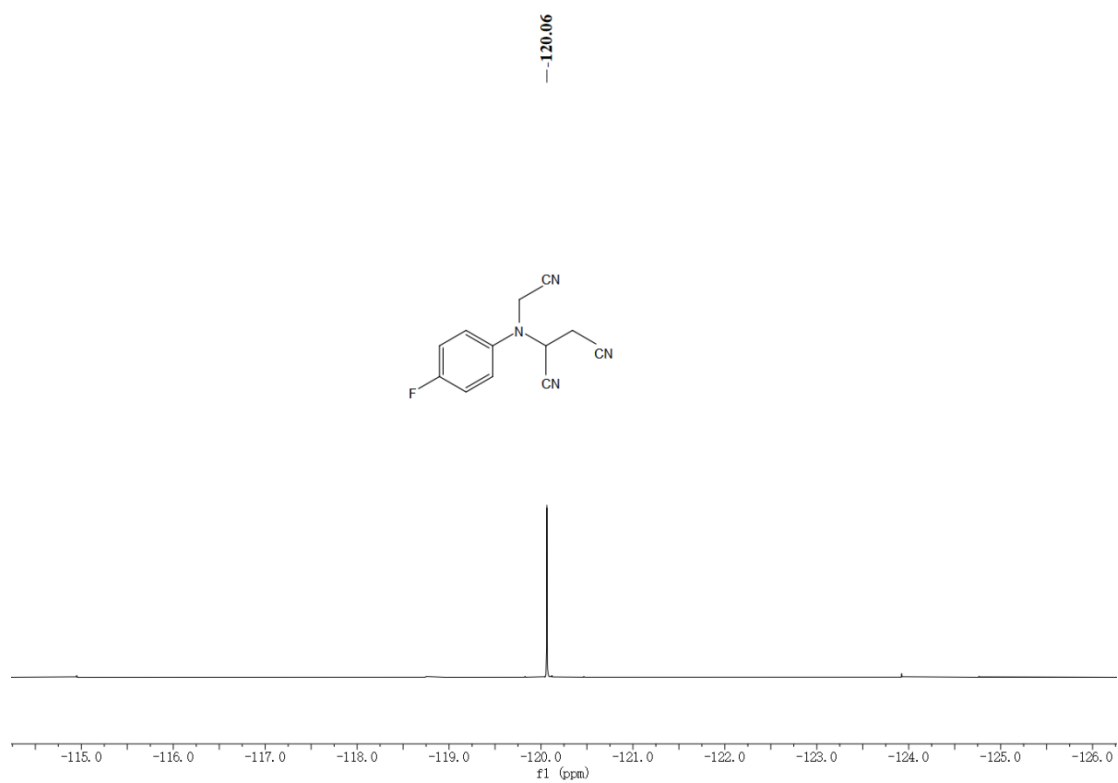

$^1\text{H}$  NMR (400 MHz,  $\text{DMSO-}d_6$ ) and  $^{13}\text{C}$  NMR (100 MHz,  $\text{DMSO-}d_6$ ) for **5f**

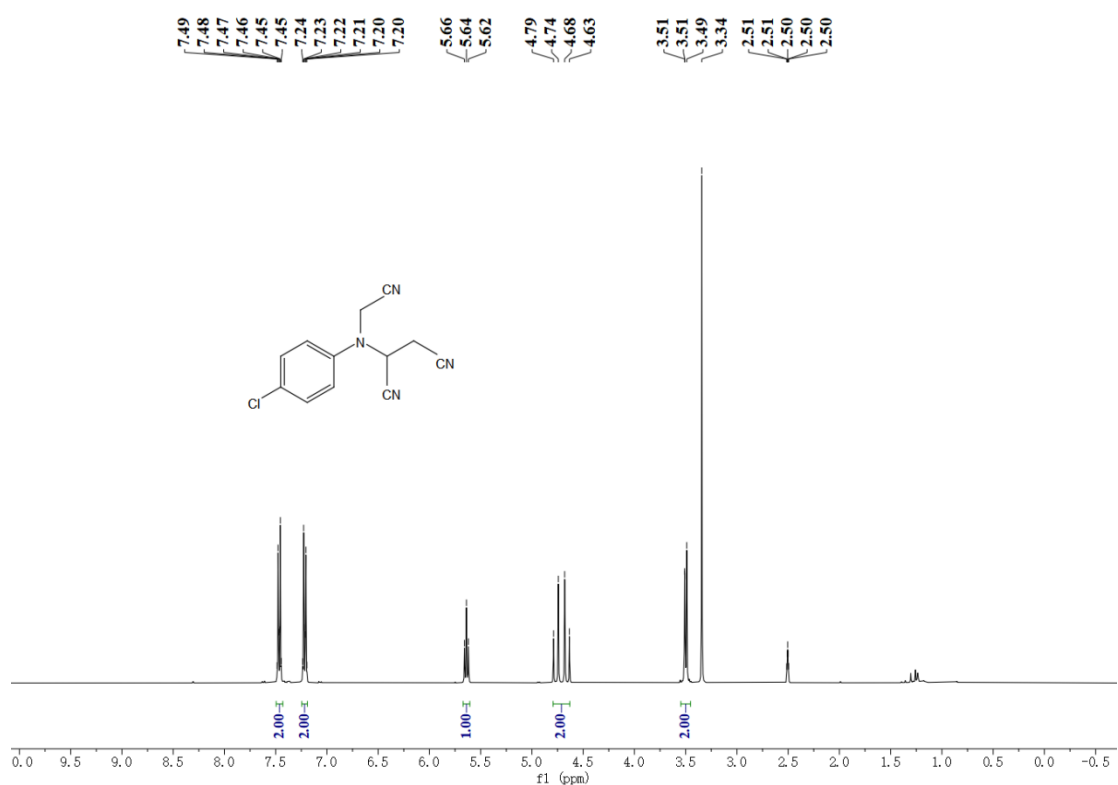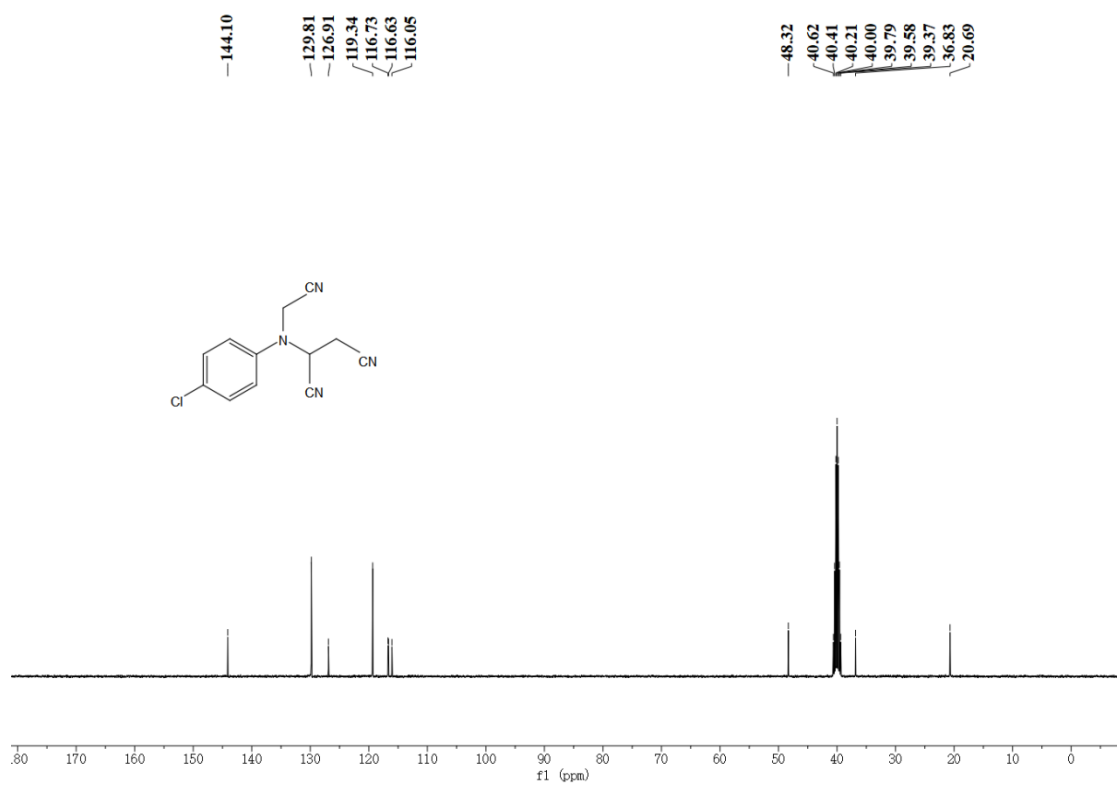



$^1\text{H}$  NMR (400 MHz,  $\text{DMSO-}d_6$ ) and  $^{13}\text{C}$  NMR (100 MHz,  $\text{DMSO-}d_6$ ) for **5g**

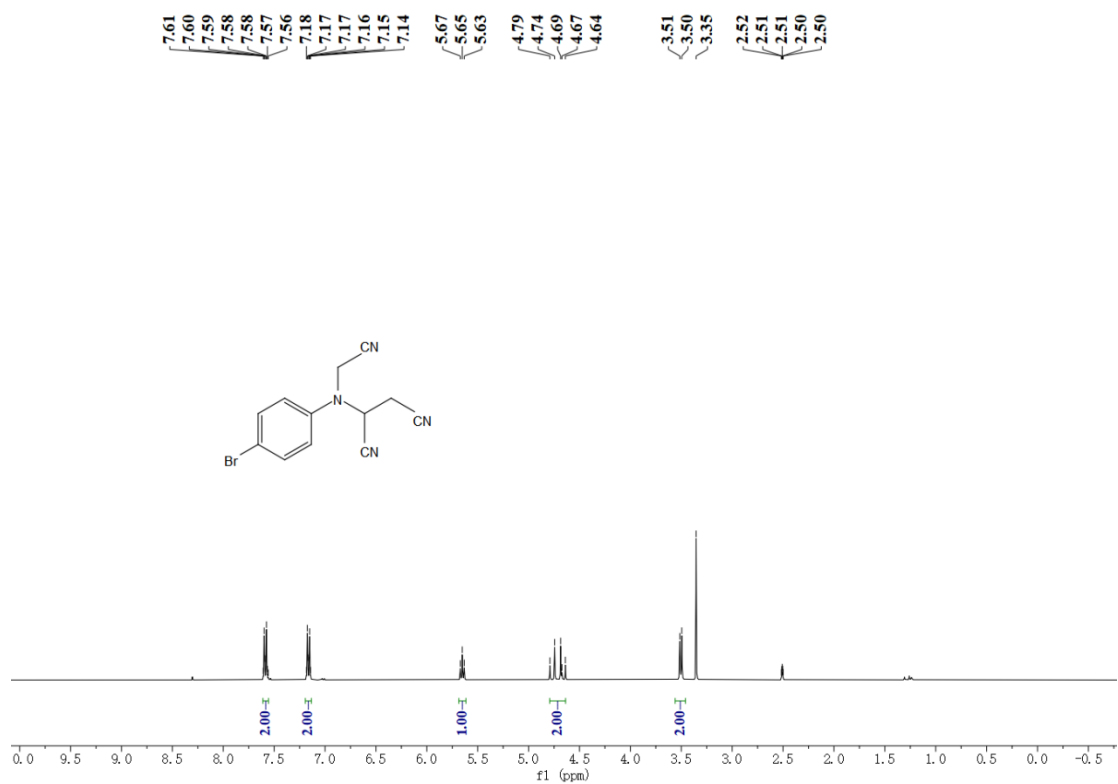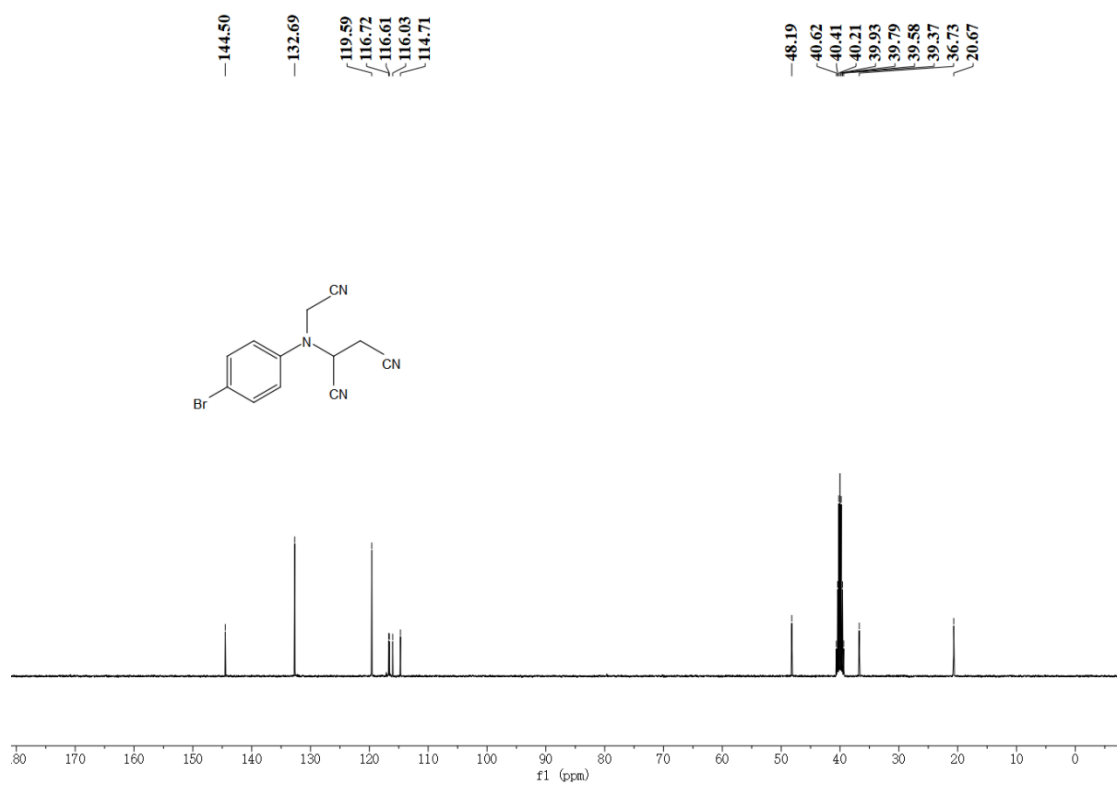

$^1\text{H}$  NMR (400 MHz,  $\text{CDCl}_3$ ) and  $^{13}\text{C}$  NMR (100 MHz,  $\text{CDCl}_3$ ) for **5h**

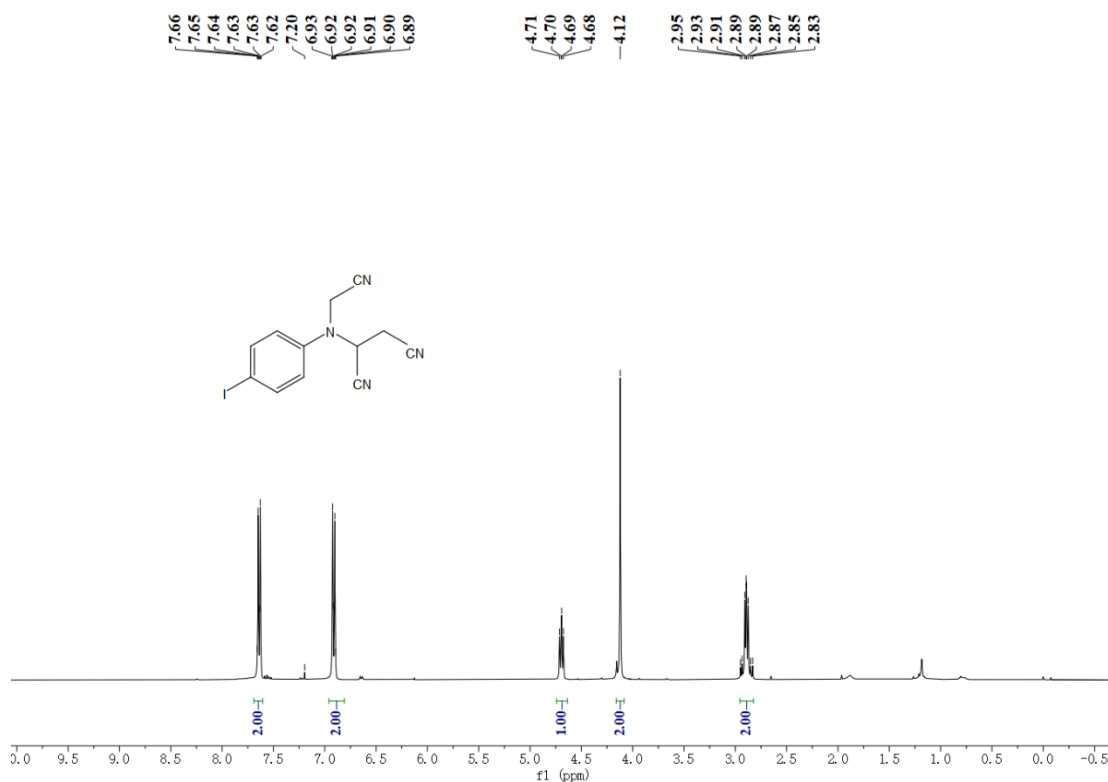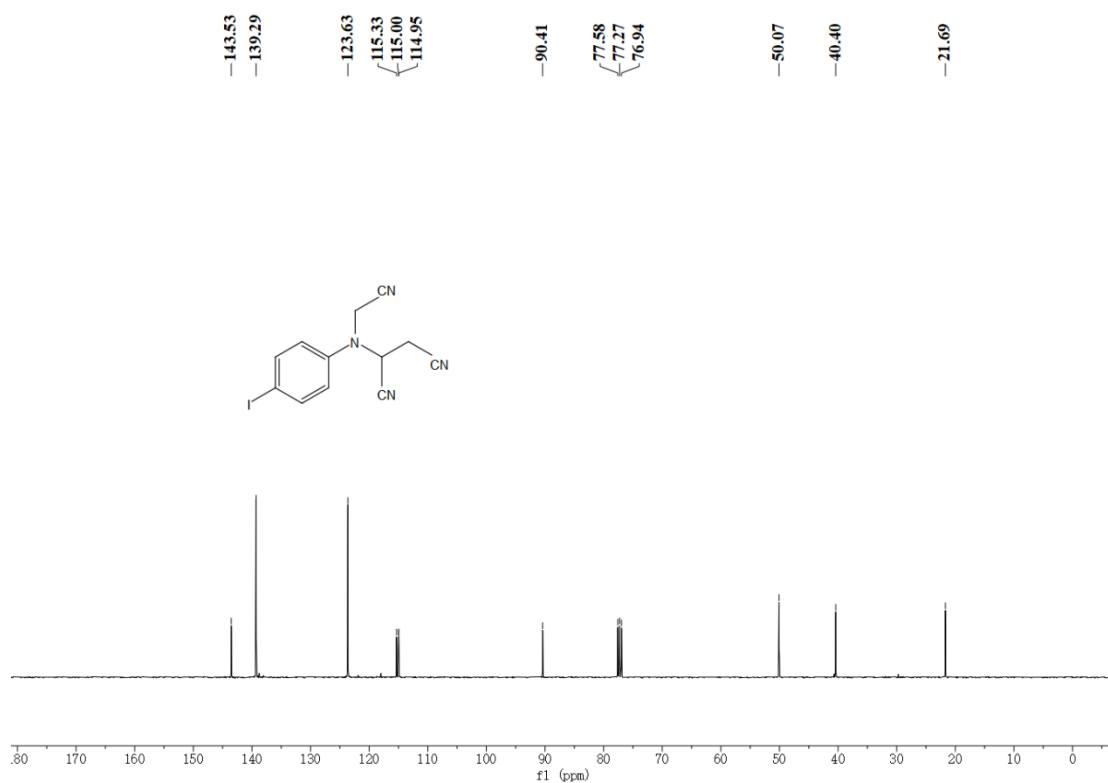

$^1\text{H}$  NMR (400 MHz,  $\text{CDCl}_3$ ) and  $^{13}\text{C}$  NMR (100 MHz,  $\text{CDCl}_3$ ) for **5k**

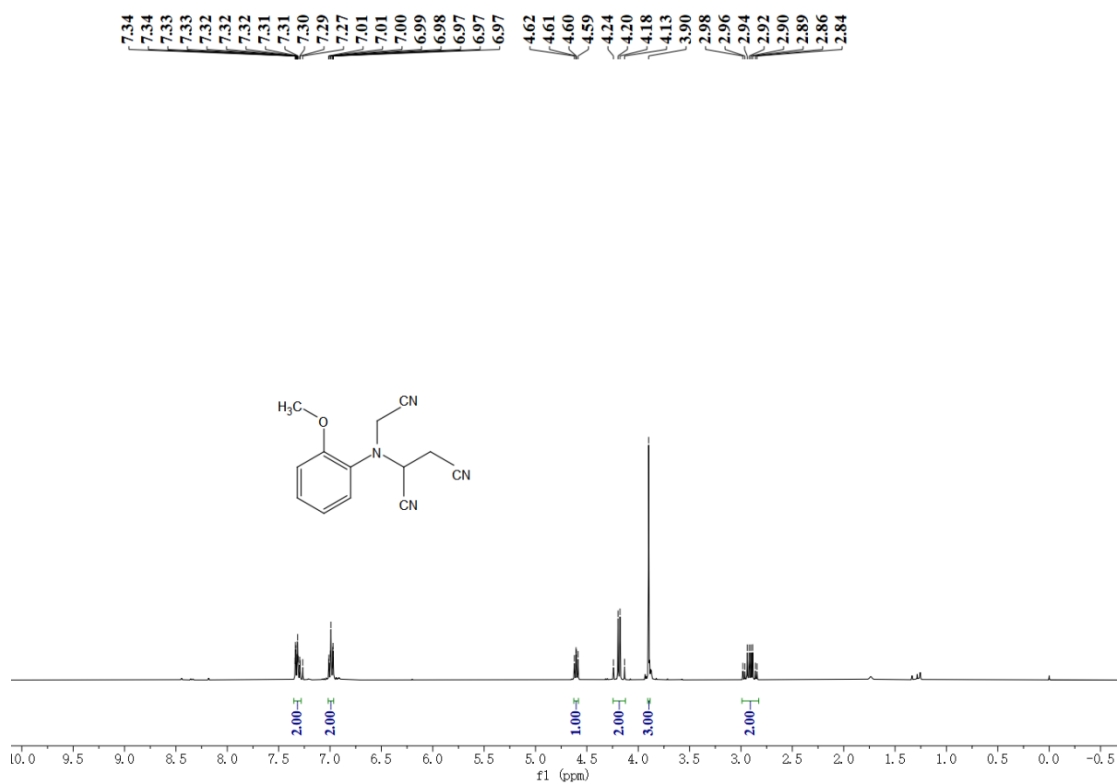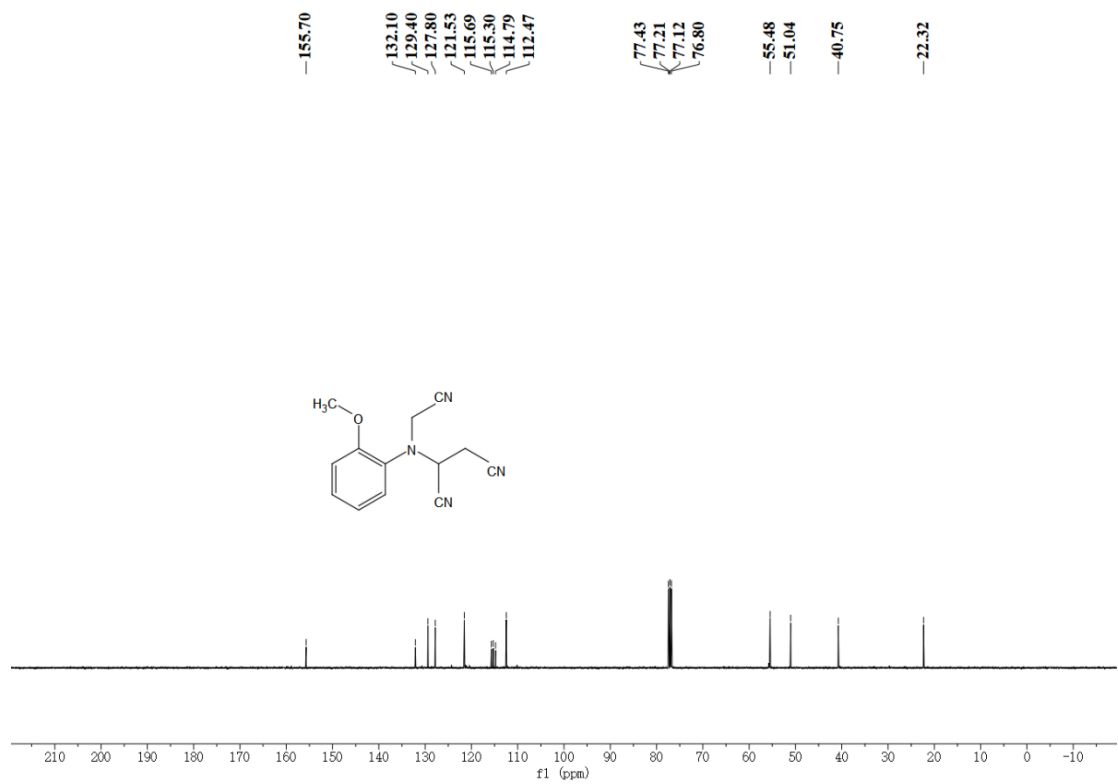

$^1\text{H}$  NMR (400 MHz,  $\text{CDCl}_3$ ) and  $^{13}\text{C}$  NMR (100 MHz,  $\text{CDCl}_3$ ) for **51**

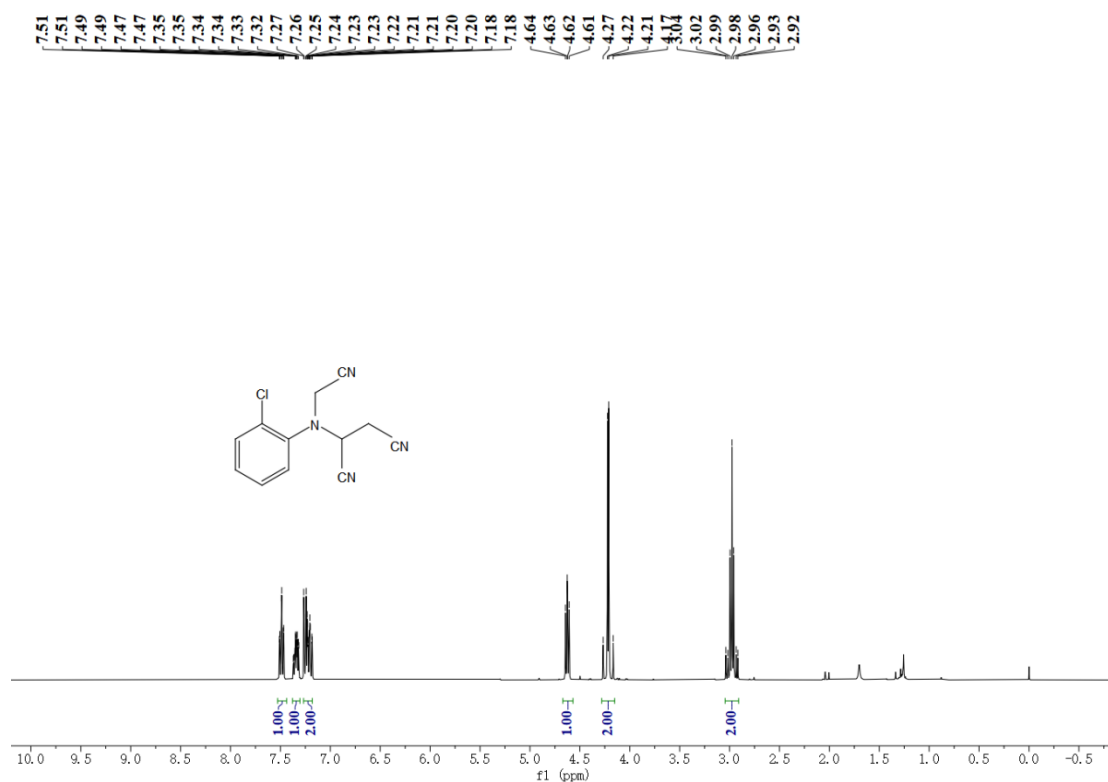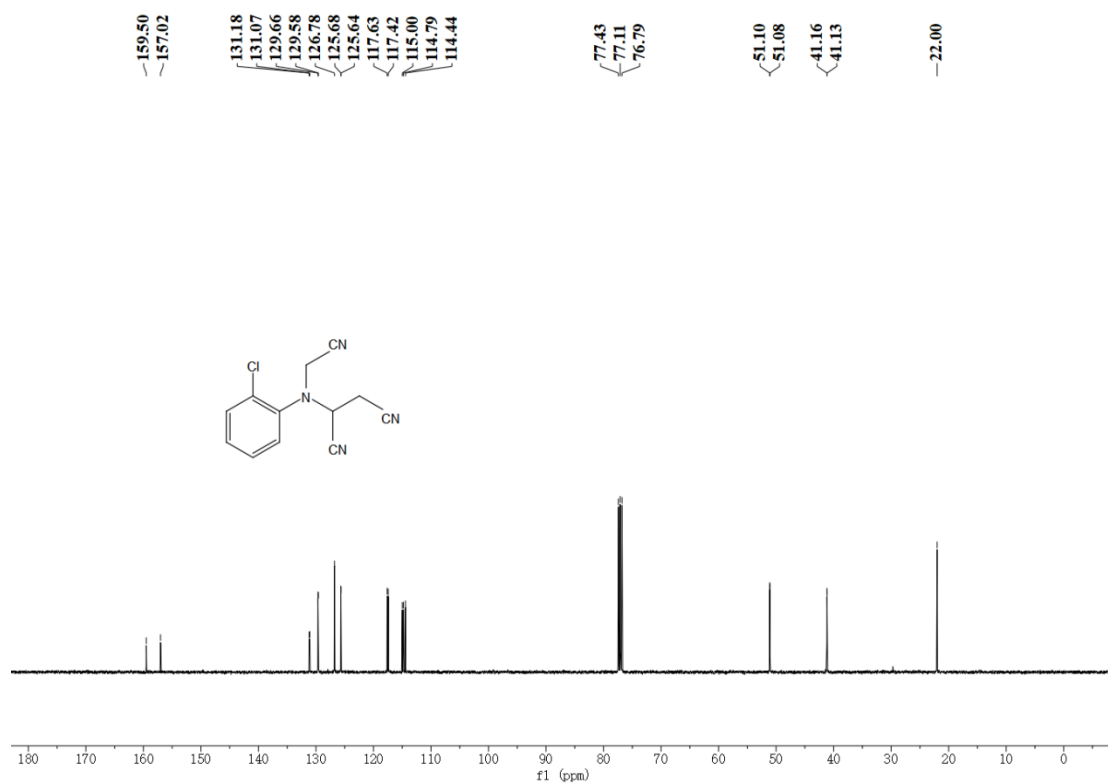

$^1\text{H}$  NMR (400 MHz,  $\text{DMSO-}d_6$ ) and  $^{13}\text{C}$  NMR (100 MHz,  $\text{DMSO-}d_6$ ) for **5m**

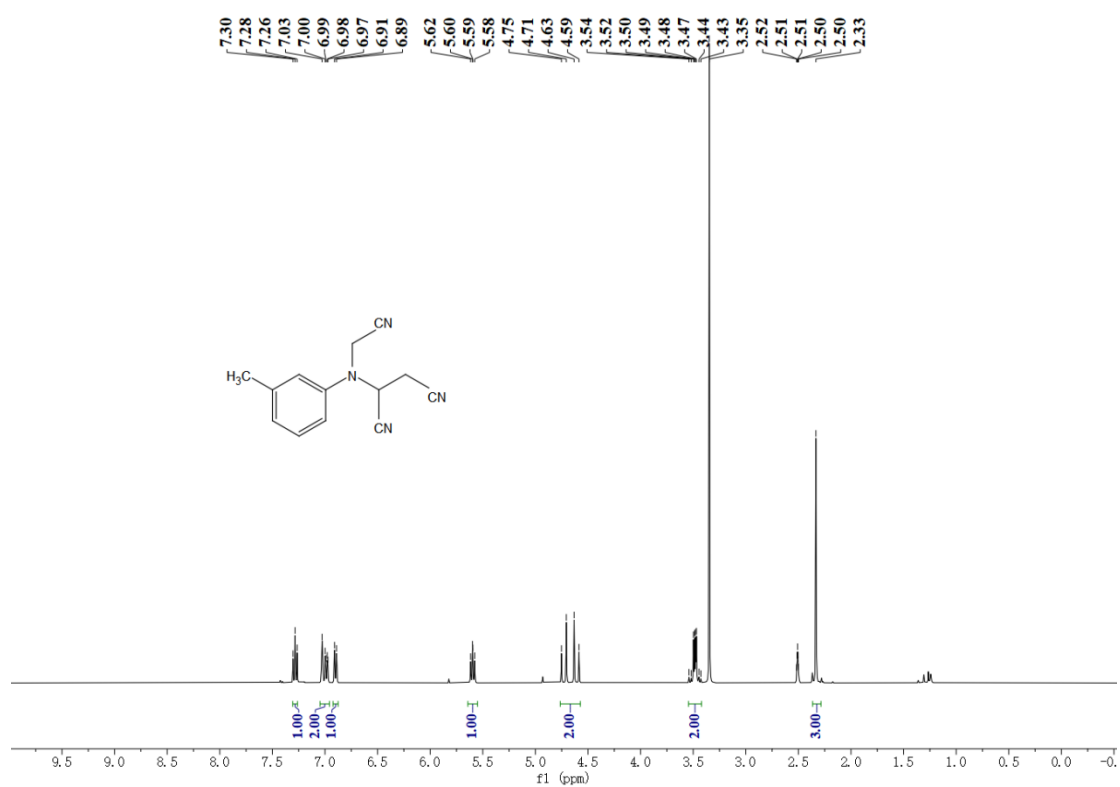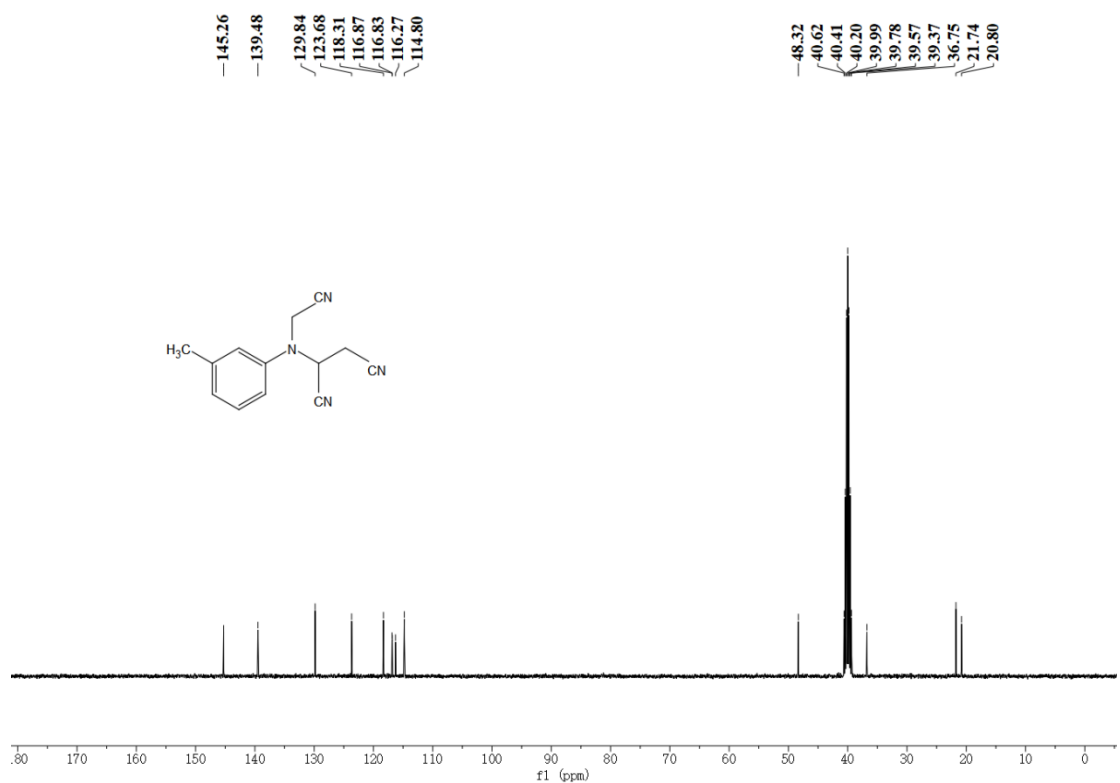

$^1\text{H}$  NMR (400 MHz,  $\text{CDCl}_3$ ),  $^{13}\text{C}$  NMR (100 MHz,  $\text{CDCl}_3$ ) and  $^{19}\text{F}$  NMR (376 MHz,  $\text{CDCl}_3$ ) spectra for **5n**

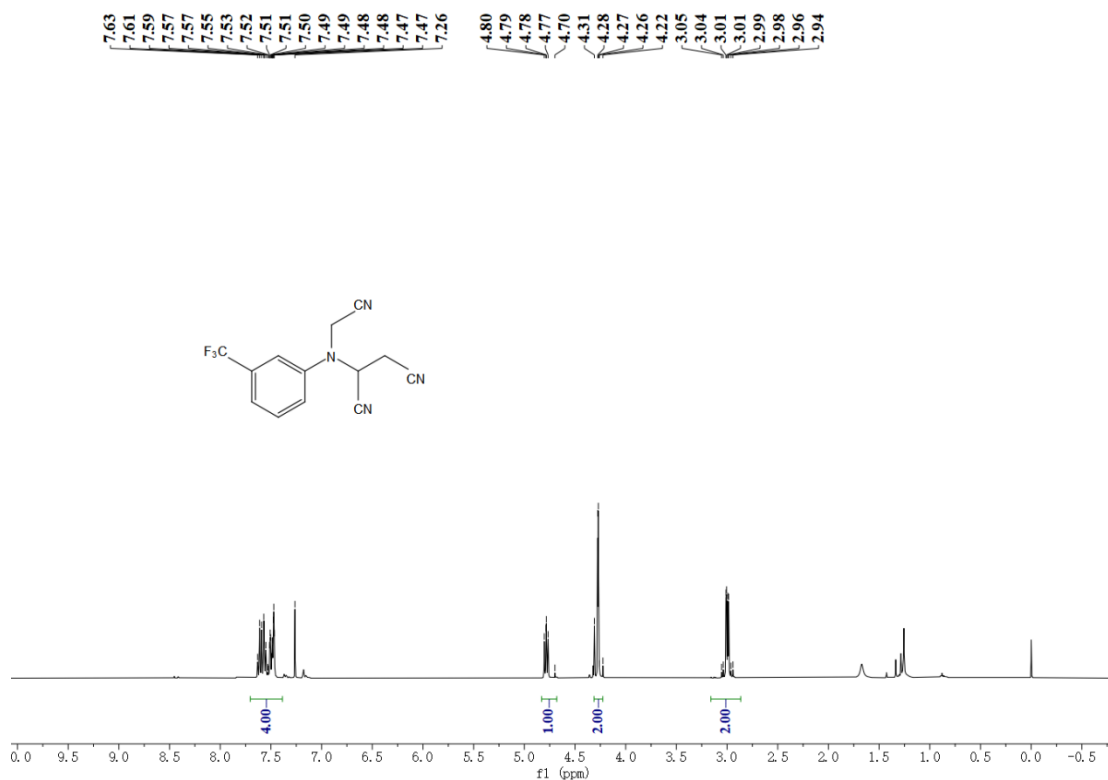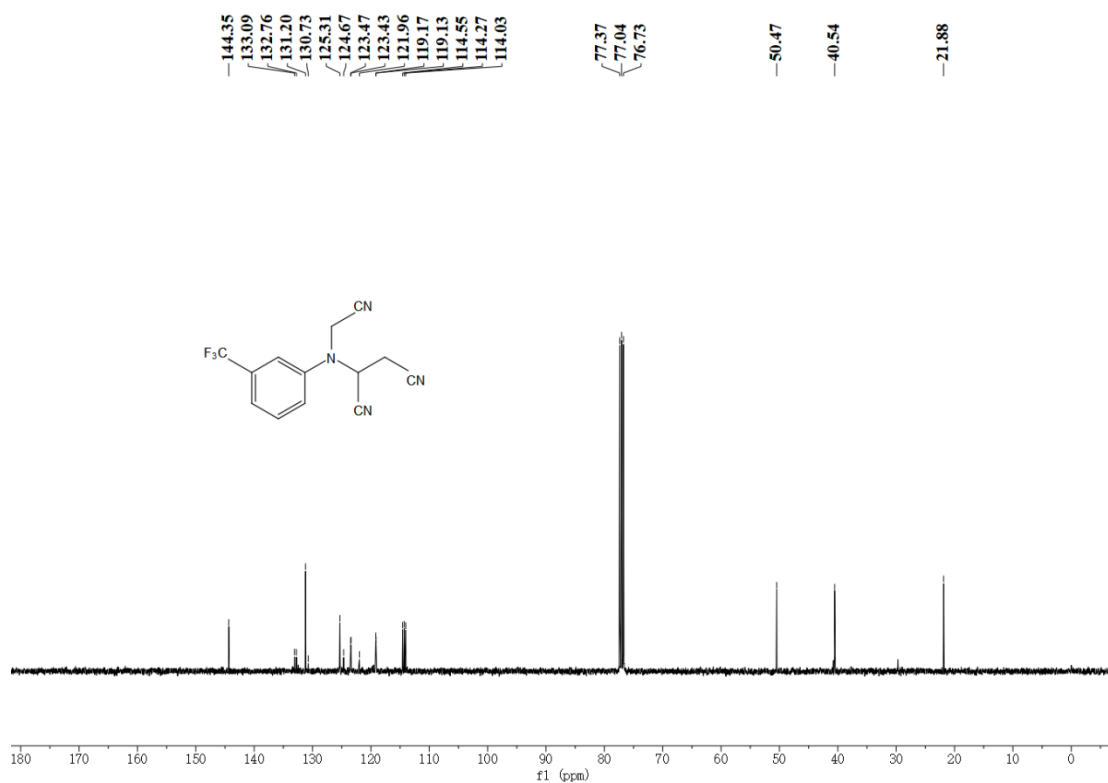

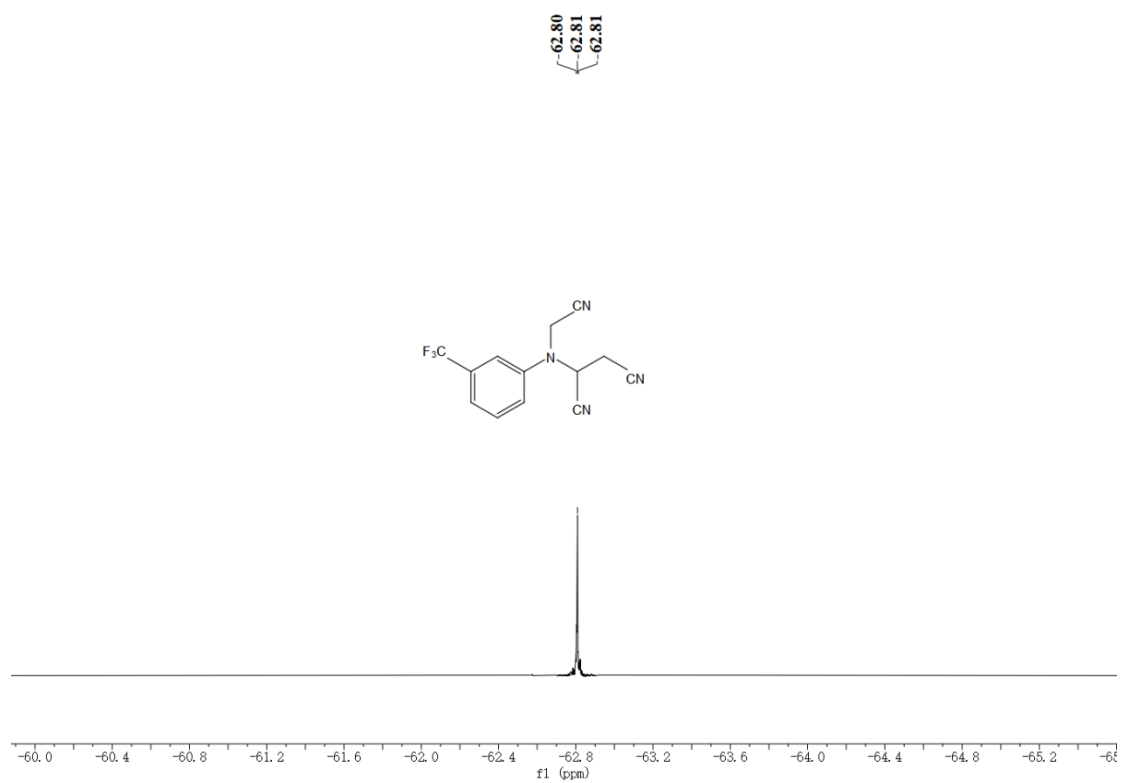

$^1\text{H}$  NMR (400 MHz,  $\text{CDCl}_3$ ),  $^{13}\text{C}$  NMR (100 MHz,  $\text{CDCl}_3$ ) and  $^{19}\text{F}$  NMR (376 MHz,  $\text{CDCl}_3$ )

spectra for **5o**

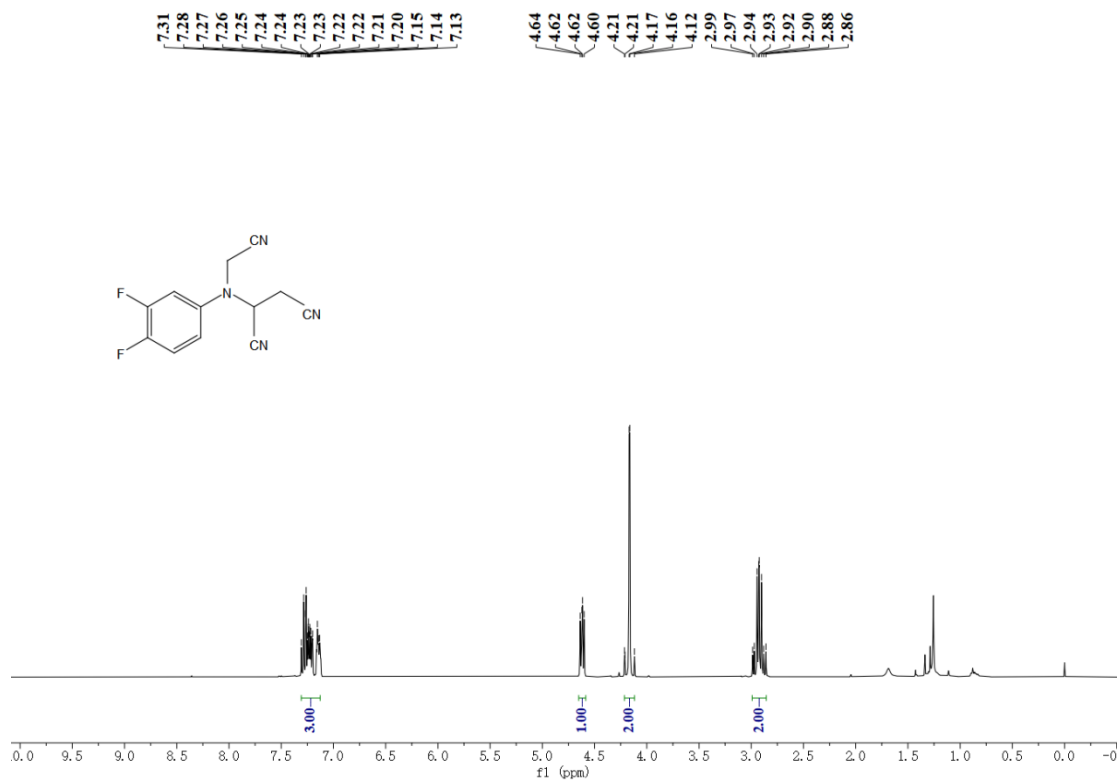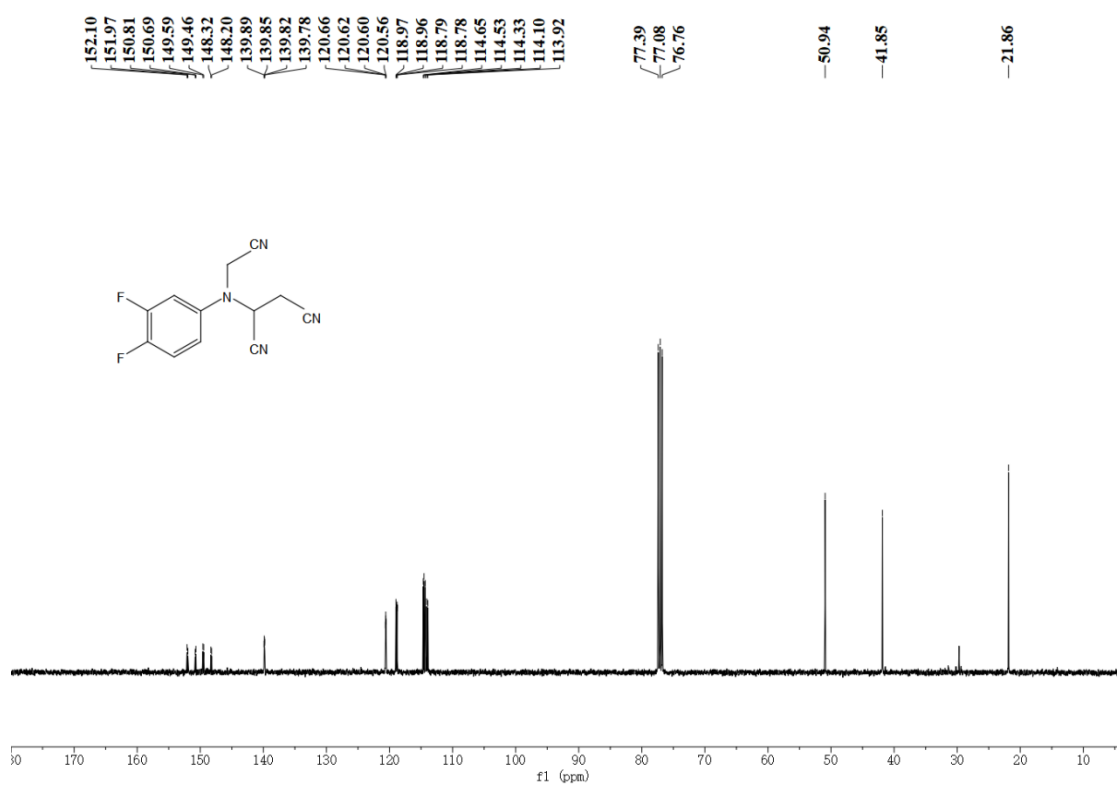



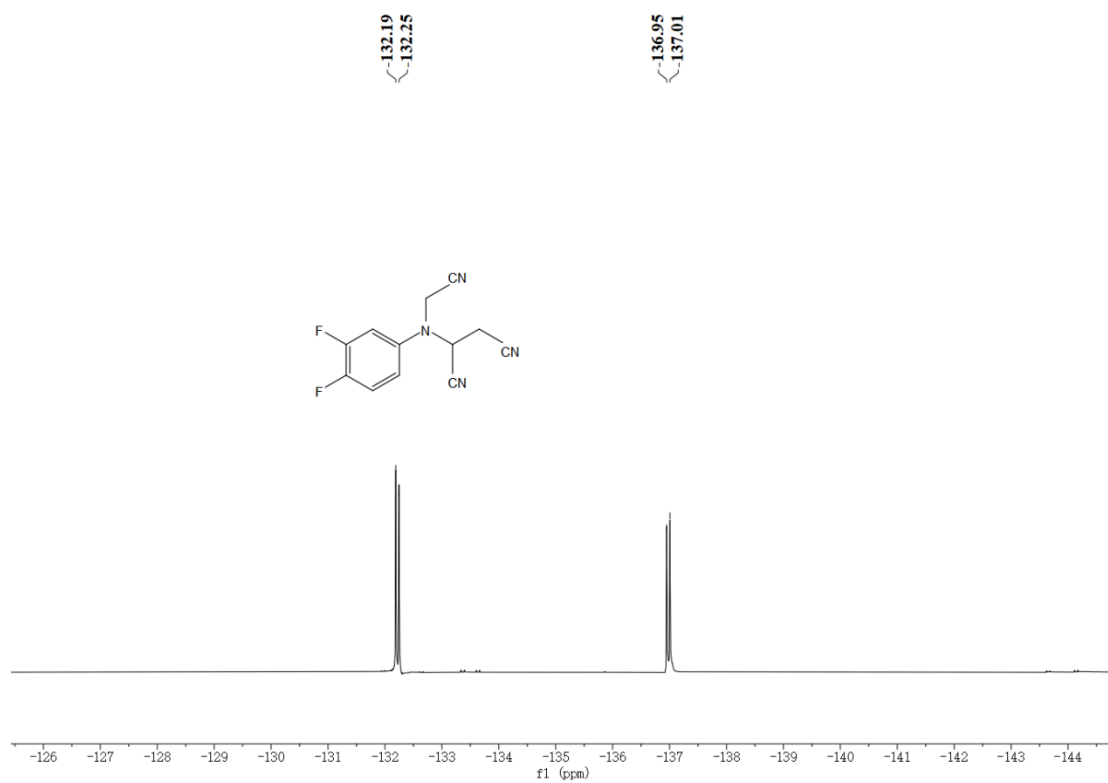

$^1\text{H}$  NMR (400 MHz,  $\text{CDCl}_3$ ),  $^{13}\text{C}$  NMR (100 MHz,  $\text{CDCl}_3$ ) and  $^{19}\text{F}$  NMR (376 MHz,  $\text{CDCl}_3$ ) spectra for **5p**

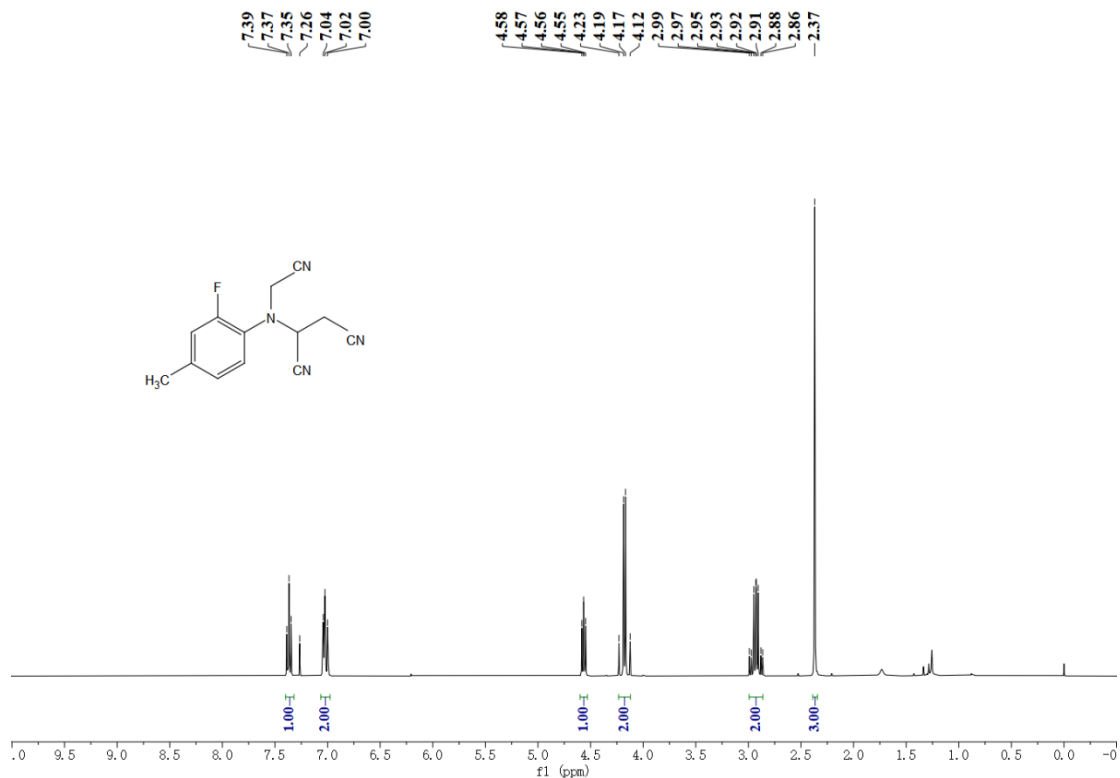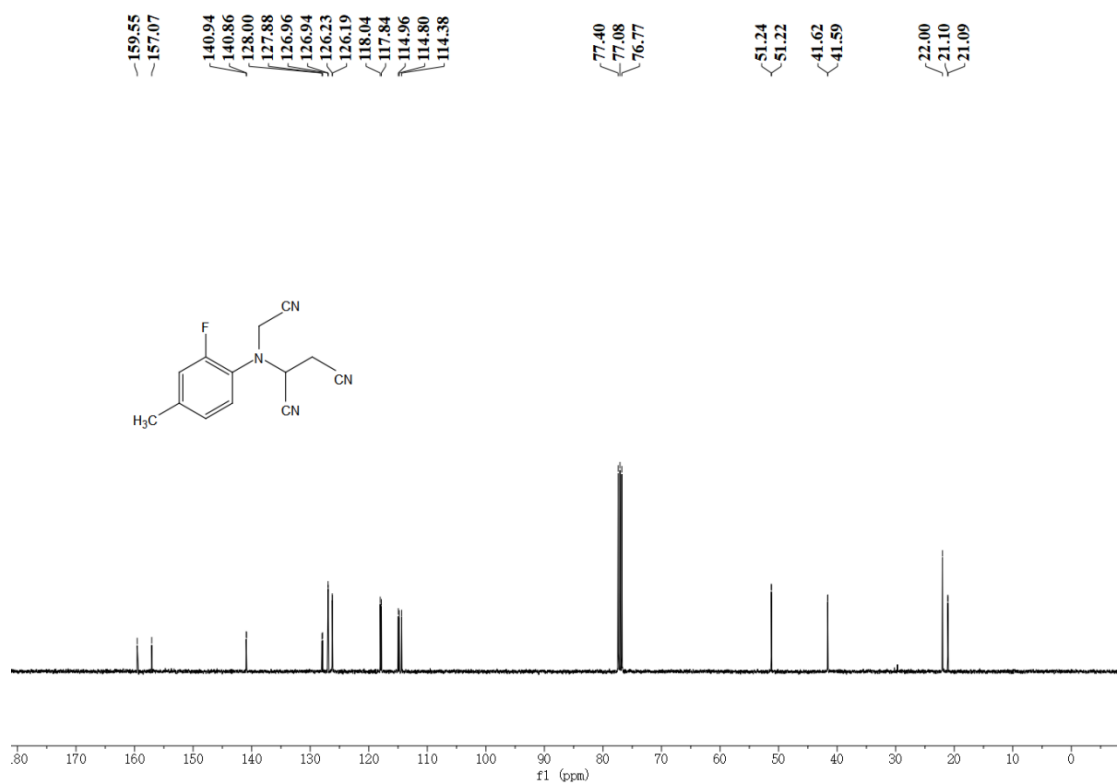

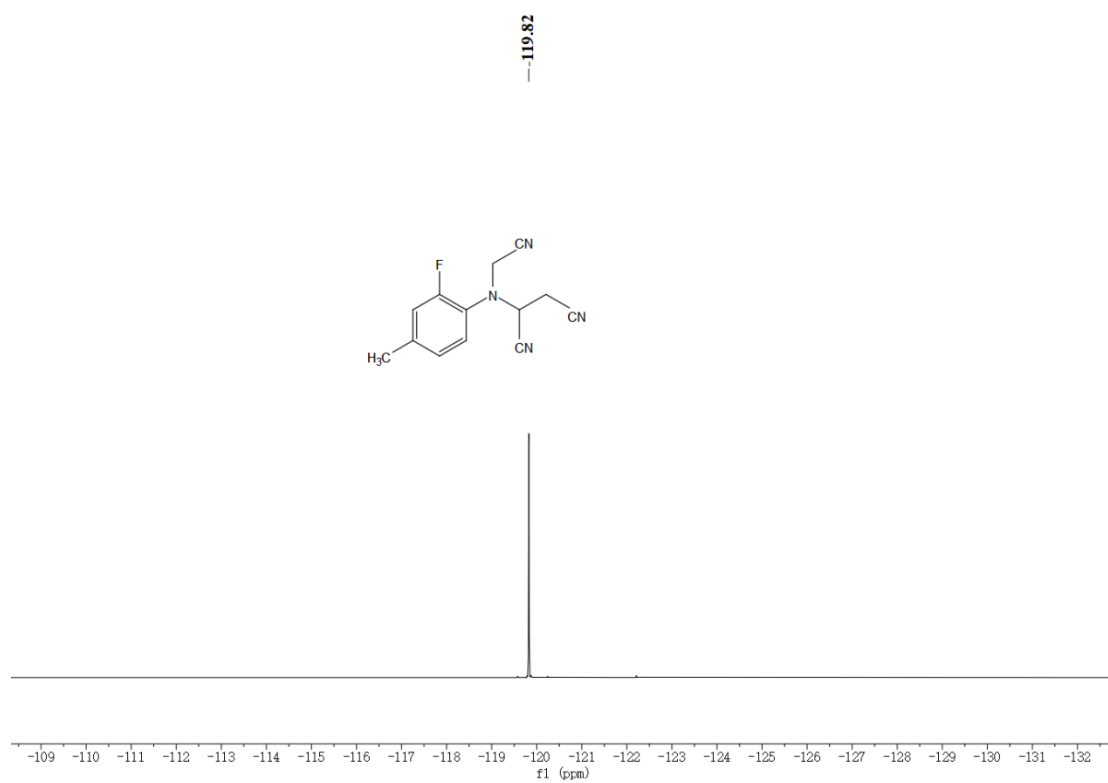

$^1\text{H}$  NMR (500 MHz,  $\text{DMSO-}d_6$ ) and  $^{13}\text{C}$  NMR (126 MHz,  $\text{DMSO-}d_6$ ) spectra for **5q**

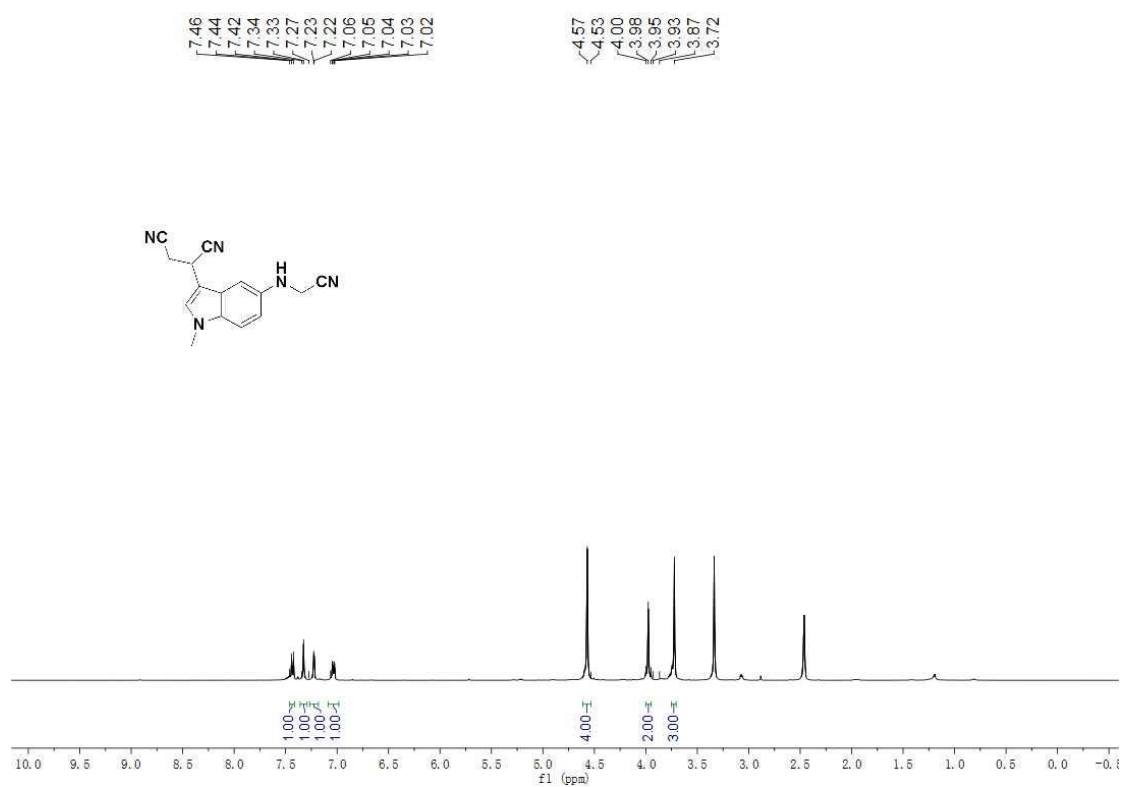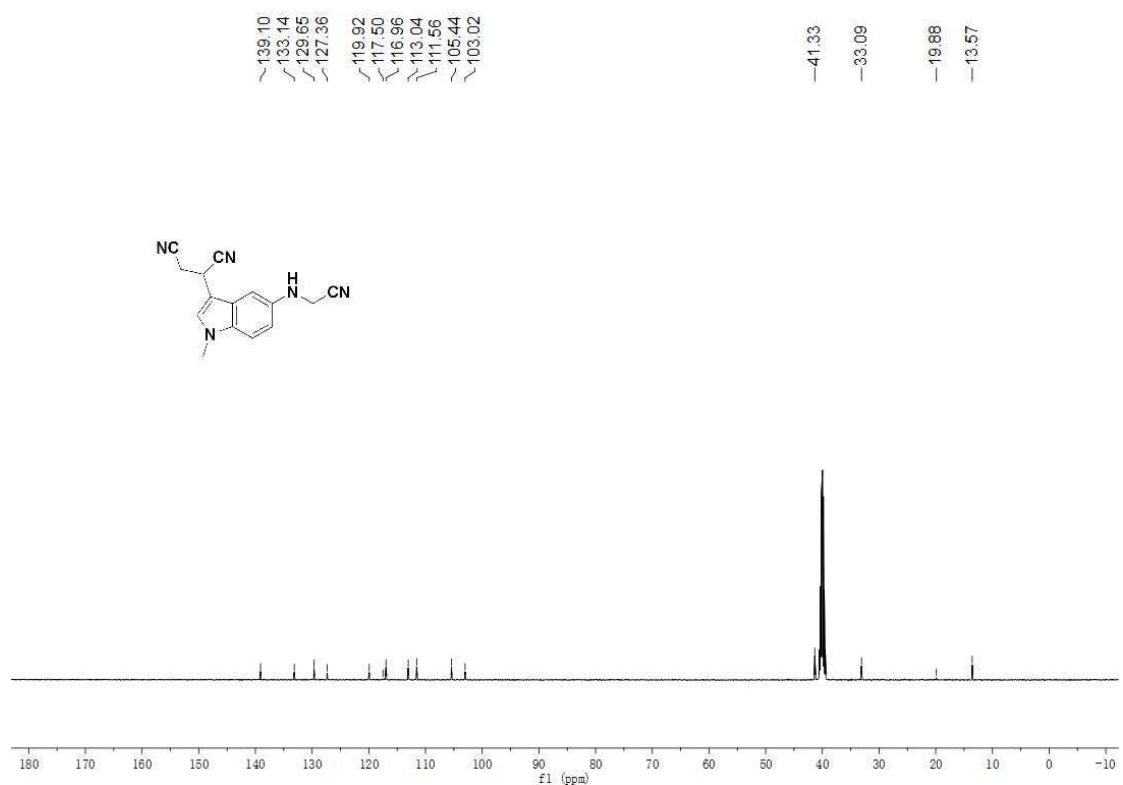

$^1\text{H}$  NMR (400 MHz,  $\text{CDCl}_3$ ),  $^{13}\text{C}$  NMR (100 MHz,  $\text{CDCl}_3$ ) and spectra for **5r**

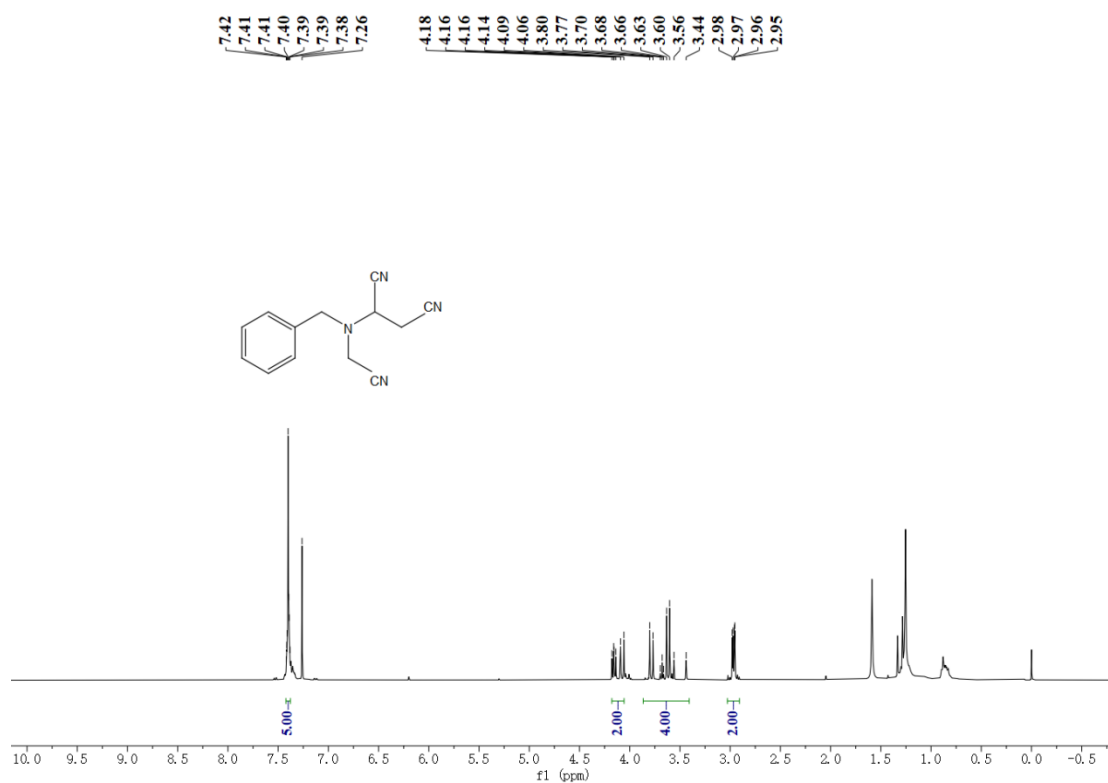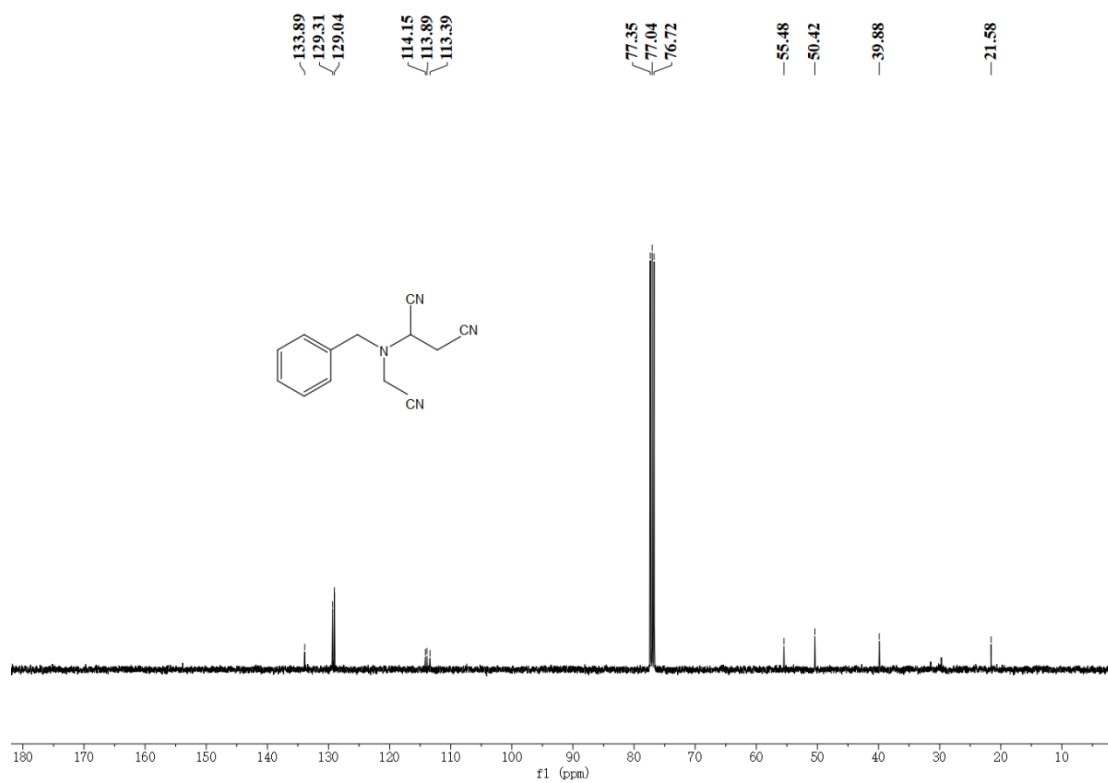

$^1\text{H}$  NMR (400 MHz,  $\text{CDCl}_3$ ) and  $^{13}\text{C}$  NMR (100 MHz,  $\text{CDCl}_3$ ) spectra for **5s**

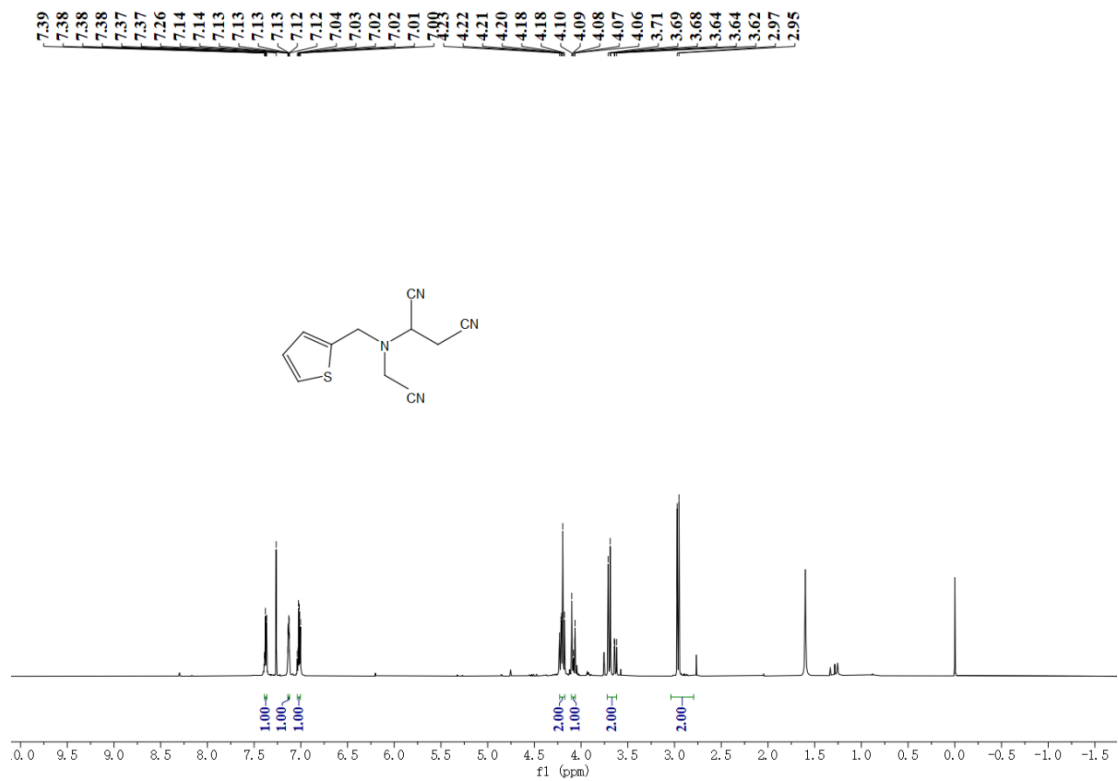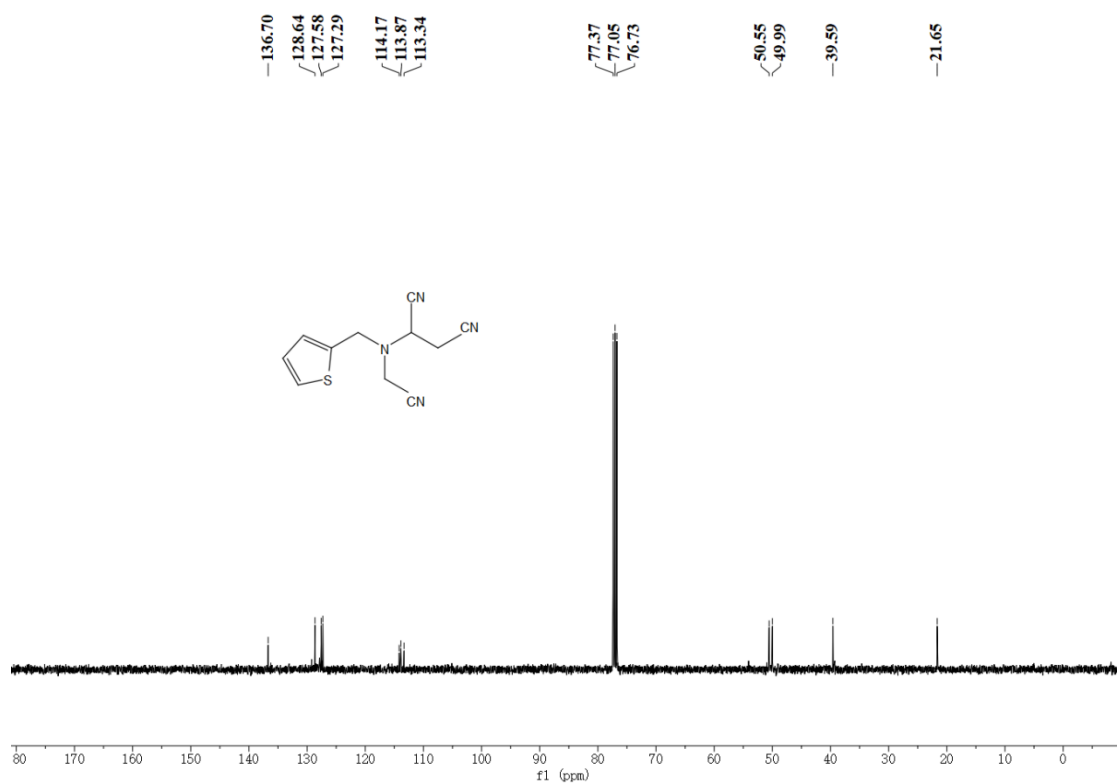

$^1\text{H}$  NMR (400 MHz,  $\text{CDCl}_3$ ) and  $^{13}\text{C}$  NMR (100 MHz,  $\text{CDCl}_3$ ) spectra for **3a'**

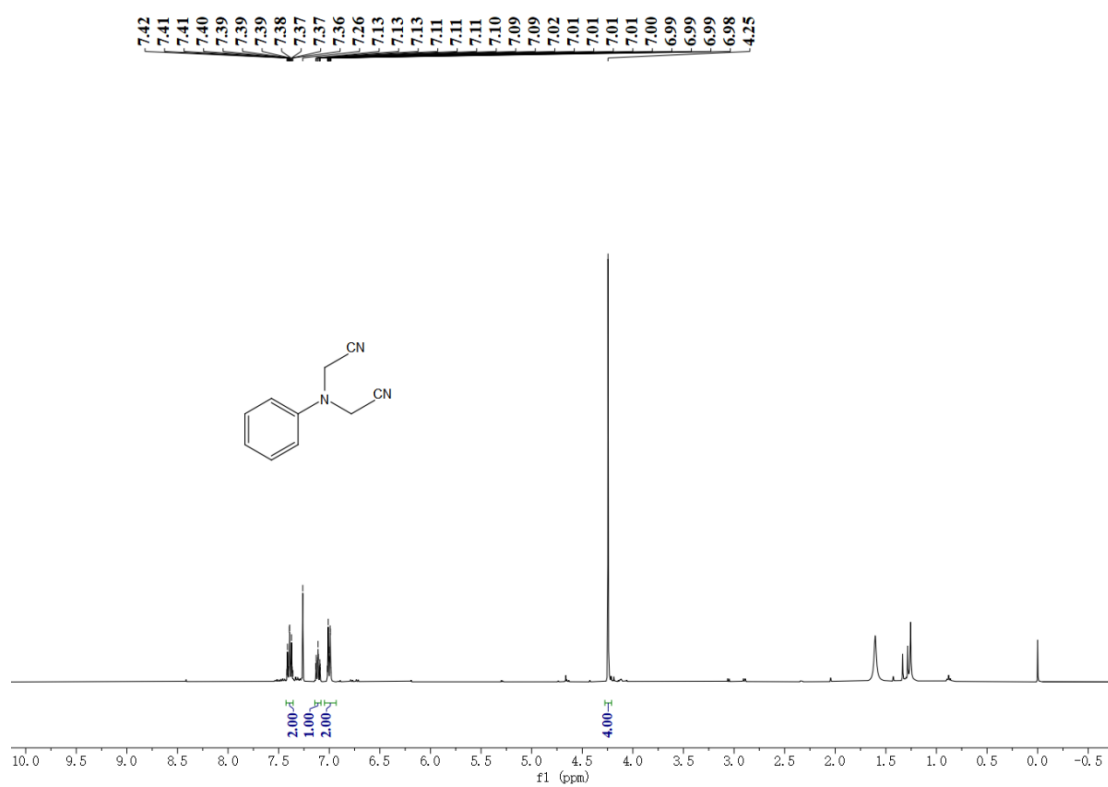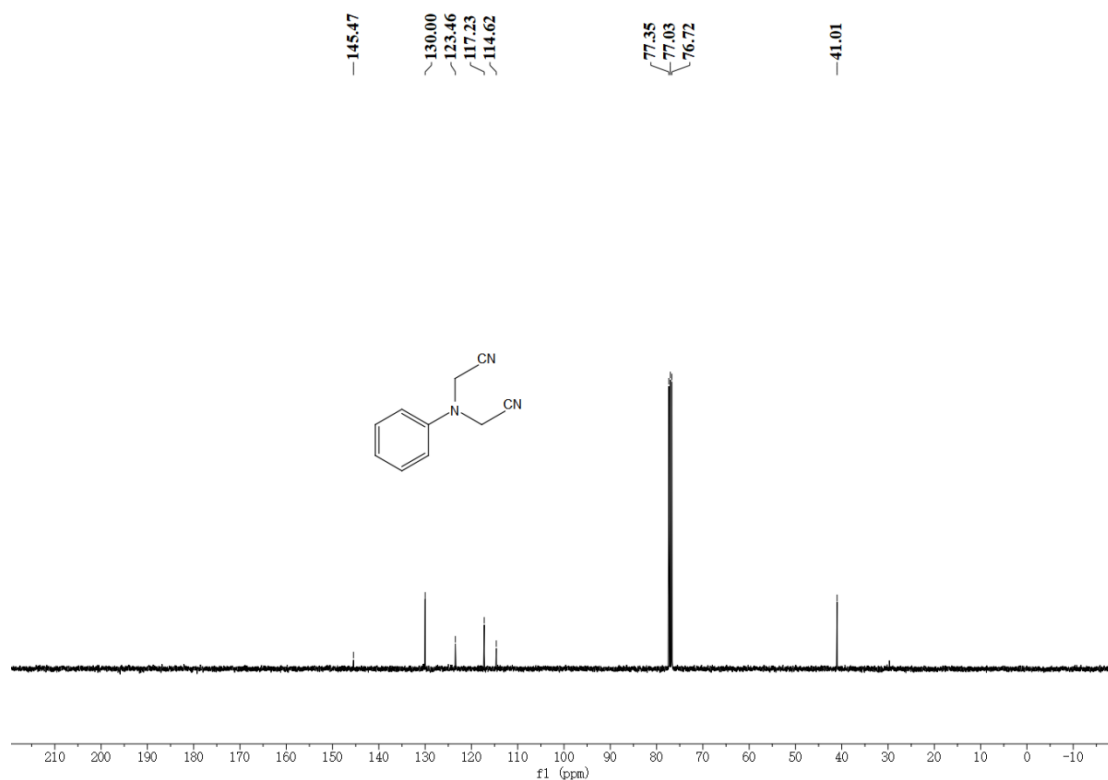

$^1\text{H}$  NMR (400 MHz,  $\text{CDCl}_3$ ) and  $^{13}\text{C}$  NMR (100 MHz,  $\text{CDCl}_3$ ) spectra for **6**

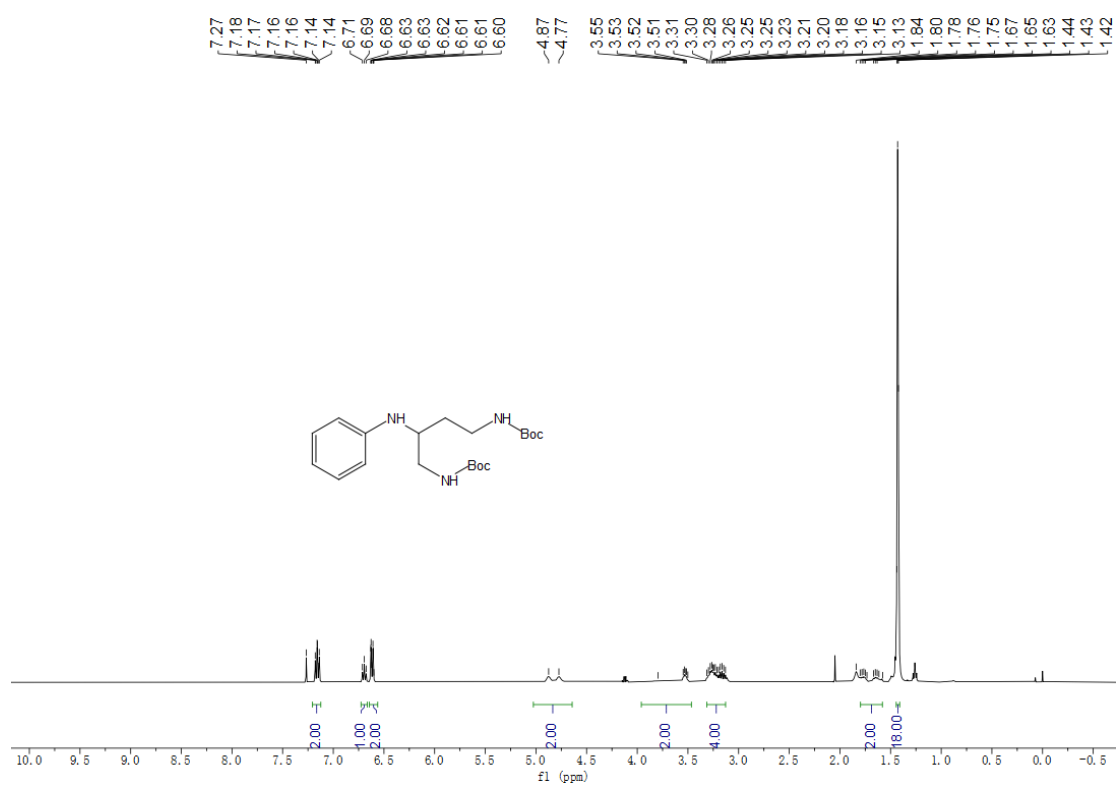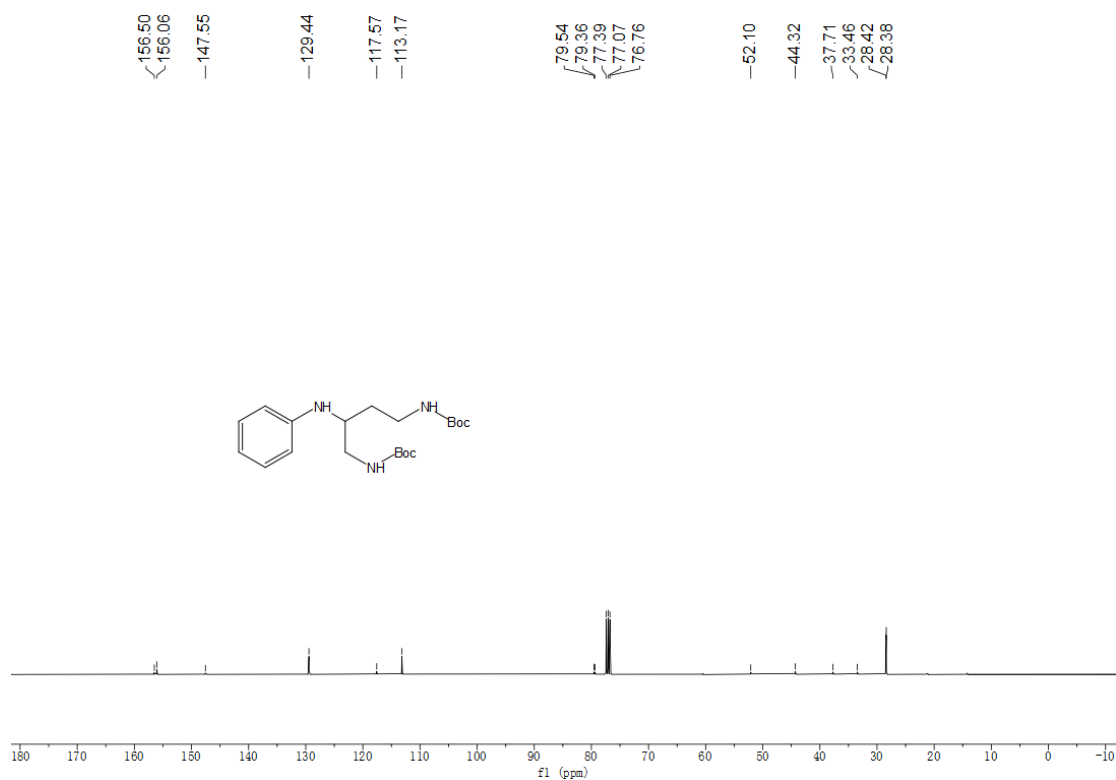

Supplement: d4qo02218a1.pdf [file d4qo02218a1.pdf]
